# Supplementary material
Source: publisher figshare collection journal article supplement (https://tandf.figshare.com/articles/dataset/_/8287793)
Supplement: Supplementary file 1 [file 15520142]

**Supplementary Appendix to**  
**Double Filter Instrumental Variable Estimation of Panel Data**  
**Models with Weakly Exogenous Variables**

Kazuhiko Hayakawa  
Department of Economics,  
Hiroshima University

Meng Qi  
School of Economics and Management  
Inner Mongolia University

Jörg Breitung  
Center of Econometrics and Statistics  
University of Cologne

# Mathematical appendix

## S.1 Derivation of $\mathbf{F}_T$

We derive the form of  $\mathbf{F}_T^l$  and  $\mathbf{F}_T^r$ . Although a brief derivation of  $\mathbf{F}_T^l$  is given in Arellano (2003), a complete derivation is not provided. Hence, we fill that gap. Let us define the following  $T_1 \times T$  matrix that takes the first difference:

$$\mathbf{D}_T = \begin{bmatrix} -1 & 1 & 0 & & 0 \\ 0 & -1 & 1 & & \\ & & & \ddots & \ddots \\ 0 & & & & -1 & 1 \end{bmatrix}.$$

Multiplying  $\mathbf{D}_T$  by (1) and noting that  $\mathbf{D}_T \boldsymbol{\iota}_T = \mathbf{0}$ , we have

$$\mathbf{D}_T \mathbf{y}_i = \mathbf{D}_T \mathbf{W}_i + \mathbf{D}_T \mathbf{v}_i$$

where it is simply assumed that  $\text{Var}(\mathbf{v}_i) = \sigma_v^2 \mathbf{I}_T$ . Since  $\text{Var}(\mathbf{D}_T \mathbf{v}_i) = \sigma_v^2 \mathbf{D}_T \mathbf{D}_T'$ , the transformed error is serially correlated. To correct for the serial correlation, we use the following transformation matrix, which is a GLS transformation:

$$\mathbf{F}_T^l = (\mathbf{D}_T \mathbf{D}_T')^{-1/2} \mathbf{D}_T,$$

where  $(\mathbf{D}_T \mathbf{D}_T')^{-1/2}$  is the *upper* triangular Cholesky factorization of  $(\mathbf{D}_T \mathbf{D}_T')^{-1}$  with<sup>S.1</sup>

$$\mathbf{D}_T \mathbf{D}_T' = \begin{matrix} (T_1 \times T_1) \\ \begin{bmatrix} 2 & -1 & 0 & & 0 \\ -1 & 2 & -1 & & \\ 0 & -1 & 2 & -1 & \\ & & \ddots & \ddots & \ddots & 0 \\ & & & -1 & 2 & -1 \\ 0 & & & 0 & -1 & 2 \end{bmatrix} \end{matrix}.$$

To compute  $(\mathbf{D}_T \mathbf{D}_T')^{-1/2}$ , we need to derive the inverse matrix  $\mathbf{H}^t = (\mathbf{D}_T \mathbf{D}_T')^{-1} = \{h_{st}^t\}$ .<sup>S.2</sup> Using the results by El-Mikkawy and Karawia (2006), we have

$$h_{st}^t = \begin{cases} \frac{T_1}{T_1+1} & \text{if } s = t = 1 \text{ or } s = t = T_1 \\ \frac{s(T_1-s+1)}{T_1+1} & \text{if } s = t < T_1 \\ \frac{s(T_1-t+1)}{T_1+1} & \text{if } s < t \\ \frac{t(T_1-s+1)}{T_1+1} & \text{if } s > t \end{cases}$$

Next, we need to compute the Cholesky factorization to  $\mathbf{H}^t$ . For a  $K \times K$  matrix  $\mathbf{A} = \{a_{ij}\}$ , its Cholesky factorization is given by

$$\mathbf{A} = \mathbf{L}\mathbf{L}'$$

where  $\mathbf{L} = (\ell_{ij})$  is the lower triangular matrix. Then using  $\ell_{ij}$ , we can write the elements of  $\mathbf{A}$  as follows:

$$a_{11} = \ell_{11}^2,$$

<sup>S.1</sup>A matrix with this structure is called *tridiagonal* matrix.

<sup>S.2</sup>Arellano (2003) does not provide the details how the upper triangular Cholesky factorization can be computed.

$$\begin{aligned}
a_{21} &= \ell_{21}\ell_{11}, & a_{22} &= \ell_{21}^2 + \ell_{22}^2, \\
a_{31} &= \ell_{31}\ell_{11}, & a_{32} &= \ell_{31}\ell_{21} + \ell_{32}\ell_{22}, & \ell_{33} &= \ell_{31}^2 + \ell_{32}^2 + \ell_{33}^2, \\
&\vdots & & \vdots & & \ddots \\
a_{K1} &= \ell_{K1}\ell_{11}, & a_{K2} &= \ell_{K1}\ell_{21} + \ell_{K2}\ell_{22}, & \cdots & , a_{KK} = \ell_{K1}^2 + \cdots + \ell_{KK}^2.
\end{aligned}$$

$\ell_{ij}$  can be solved sequentially as follows:

$$\begin{aligned}
\ell_{11} &= \sqrt{a_{11}}, \\
\ell_{21} &= a_{21}/\ell_{11}, & \ell_{22} &= \sqrt{a_{22} - \ell_{21}^2}, \\
\ell_{31} &= a_{31}/\ell_{11}, & \ell_{32} &= (a_{32} - \ell_{31}\ell_{21})/\ell_{22}, & \ell_{33} &= \sqrt{a_{33} - \ell_{31}^2 - \ell_{32}^2}, \\
&\vdots & & \vdots & & \ddots \\
\ell_{K1} &= a_{K1}/\ell_{11}, & \ell_{K2} &= (a_{K2} - \ell_{K1}\ell_{21})/a_{K2}, & \cdots & \ell_{KK} = \sqrt{a_{KK} - \ell_{K1}^2 - \cdots - \ell_{K,K-1}^2}.
\end{aligned}$$

The explicit form of  $\mathbf{F}_T^l$  is obtained by letting  $\mathbf{A} = \mathbf{H}^l$ .

Next, we consider a model with individual effects and heterogeneous time trends given by (12). To remove both  $\eta_i$  and  $\lambda_i$  from the model, we take second differences. In terms of a model in matrix, this corresponds to multiplying by  $\mathbf{D}_{T_1}\mathbf{D}_T$ ,  $(T_2 \times T)$ , we have

$$\mathbf{D}_{T_1}\mathbf{D}_T\mathbf{y}_i = \mathbf{D}_{T_1}\mathbf{D}_T\mathbf{W}_i\boldsymbol{\delta} + \mathbf{D}_{T_1}\mathbf{D}_T\mathbf{v}_i.$$

Since the transformed error is serially correlated, we consider the following GLS-type transformation matrix:

$$\mathbf{F}_T^r = (\mathbf{D}_{T_1}\mathbf{D}_T\mathbf{D}'_T\mathbf{D}'_{T_1})^{-1/2}\mathbf{D}_{T_1}\mathbf{D}_T,$$

where  $(\mathbf{D}_{T_1}\mathbf{D}_T\mathbf{D}'_T\mathbf{D}'_{T_1})^{-1/2}$  is the *upper* triangular Cholesky factorization of  $(\mathbf{D}_{T_1}\mathbf{D}_T\mathbf{D}'_T\mathbf{D}'_{T_1})^{-1}$ . To compute  $\mathbf{F}_T^r$ , we need to derive the inverse matrix  $\mathbf{H}^r = (\mathbf{D}_{T_1}\mathbf{D}_T\mathbf{D}'_T\mathbf{D}'_{T_1})^{-1} = \{h_{st}^r\}$  with<sup>S.3</sup>

$$\mathbf{D}_{T_1}\mathbf{D}_T\mathbf{D}'_T\mathbf{D}'_{T_1} = \begin{matrix} (T_2 \times T_2) \\ \begin{bmatrix} 6 & -4 & 1 & & 0 \\ -4 & 6 & -4 & & \\ 1 & -4 & 6 & -4 & \\ & & \ddots & \ddots & \ddots & 1 \\ & & & -4 & 6 & -4 \\ 0 & & & 1 & -4 & 6 \end{bmatrix} \end{matrix}.$$

Using the results by Dow (2003), we have<sup>S.4</sup>

$$h_{st}^r = \begin{cases} a_{t0}s^3 + a_{t1}s^2 + a_{t2}s, & s \leq t+1 \\ b_{t0}s^3 + b_{t1}s^2 + b_{t2}s + b_{t3}, & s \geq t+1 \end{cases}$$

where

$$\begin{aligned}
a_{t0} &= -(3 + 2t + T_2)d_t/c, & a_{t1} &= 3t(1 + T_2)d_t/c, & a_{t2} &= (3 + 5t + T_2 + 3tT_2)d_t/c, \\
b_{t0} &= (5 - 2t + 3T_2)e_t/c, & b_{t1} &= -3(1 + T_2)(4 - t + 2T_2)e_t/c, \\
b_{t2} &= (1 + 5t + 12T_2 + 3tT_2 + 12T_2^2 + 3T_2^3)e_t/c, & b_{t3} &= (1 - t)e_t/6, \\
d_t &= (T_2 - t + 1)(T_2 - t + 2), & e_t &= t(t + 1), & c &= 6(T_2 + 1)(T_2 + 2)(T_2 + 3).
\end{aligned}$$

Using these results and applying the algorithm of Cholesky factorization introduced above where  $\mathbf{A} = \mathbf{H}^r$ , after a lengthy calculation, we obtain the explicit expression of  $\mathbf{F}_T^r$  as in (13).

<sup>S.3</sup>A matrix with this structure is called *pentadiagonal* matrix.

<sup>S.4</sup>See also Chen (2013) for an alternative expression.

## S.2 Derivation of asymptotic variances (36) and (37)

Let us define  $\mathbf{y}_{i,-1} = (y_{i0}, \dots, y_{i,T-1})'$  and  $\text{Var}(\mathbf{y}_{i,-1}) = \mathbf{V}_T = \sigma_\mu^2 \boldsymbol{\nu}_T \boldsymbol{\nu}_T' + \sigma_v^2 \boldsymbol{\Phi}_T$  where  $\sigma_\mu^2 = \sigma_\eta^2 / (1 - \alpha)^2$  and  $\boldsymbol{\Phi}_T = \{\phi_{st}\} = \alpha^{|s-t|} / (1 - \alpha^2)$ . Also, let  $\mathbf{f}'_t$  be the  $t$ th row of  $\mathbf{F}'_T$ ,  $\mathbf{L}_{(s:t)}$  be the  $s$ th to  $t$ th rows of  $\mathbf{I}_T$  and  $\mathbf{B}_{(s:t)}$  be the  $s$ th to  $t$ th rows of  $\mathbf{B}'_T$ . Then, we obtain  $y_{i,t-1}^* = \mathbf{f}'_t \mathbf{y}_{i,-1}$  and

$$\mathbf{z}_{it}^L = (y_{i,t-\ell}, \dots, y_{i,t-1})' = \mathbf{L}_{(t-\ell+1:t)} \mathbf{y}_{i,-1}, \quad \mathbf{z}_{it}^B = (y_{i,t-\ell}^*, \dots, y_{i,t-1}^*)' = \mathbf{B}_{(t-\ell+1:t)} \mathbf{y}_{i,-1}.$$

Using this, we have

$$\begin{aligned} E\left(\mathbf{z}_{it}^{L(\ell)} y_{i,t-1}^*\right) &= \mathbf{L}_{(t-\ell+1:t)} \mathbf{V}_T \mathbf{f}_t, & E\left(\mathbf{z}_{it}^{B(\ell)} y_{i,t-1}^*\right) &= \mathbf{B}_{(t-\ell+1:t)} \mathbf{V}_T \mathbf{f}_t, \\ E\left(\mathbf{z}_{it}^{L(\ell)} \mathbf{z}_{it}^{L(\ell)'}\right) &= \mathbf{L}_{(t-\ell+1:t)} \mathbf{V}_T \mathbf{L}'_{(t-\ell+1:t)}, & E\left(\mathbf{z}_{it}^{B(\ell)} \mathbf{z}_{it}^{B(\ell)'}\right) &= \mathbf{B}_{(t-\ell+1:t)} \mathbf{V}_T \mathbf{B}'_{(t-\ell+1:t)}. \end{aligned}$$

Hence, (36) and (37) can be written as

$$\text{Avar}(\widehat{\alpha}_{GMM}^L) = \sigma_v^2 \left[ \sum_{t=1}^{T-1} \mathbf{f}'_t \mathbf{V}_T \mathbf{L}'_{(t-\ell+1:t)} \left[ \mathbf{L}_{(t-\ell+1:t)} \mathbf{V}_T \mathbf{L}'_{(t-\ell+1:t)} \right]^{-1} \mathbf{L}_{(t-\ell+1:t)} \mathbf{V}_T \mathbf{f}_t \right]^{-1} \quad (\text{S.1})$$

$$\text{Avar}(\widehat{\alpha}_{GMM}^B) = \sigma_v^2 \left[ \sum_{t=2}^{T-1} \mathbf{f}'_t \mathbf{V}_T \mathbf{B}'_{(t-\ell+1:t)} \left[ \mathbf{B}_{(t-\ell+1:t)} \mathbf{V}_T \mathbf{B}'_{(t-\ell+1:t)} \right]^{-1} \mathbf{B}_{(t-\ell+1:t)} \mathbf{V}_T \mathbf{f}_t \right]^{-1} \quad (\text{S.2})$$

Figure 1 is described based on (S.1) and (S.2) numerically without deriving the explicit form of expectations such as  $E\left(\mathbf{z}_{it}^{L(\ell)} y_{i,t-1}^*\right)$ .

## S.3 Proof of Theorem 1

We derive the explicit formula for asymptotic variances of IV and GMM estimators. First, consider  $\text{Avar}(\widehat{\alpha}_{GMM}^{L(t)})$ . Note that under Assumption 1,  $y_{i,t-1}$  can be written as

$$y_{i,t-1} = \frac{\eta_i}{1 - \alpha} + \xi_{i,t-1} \quad (\text{S.3})$$

where  $\xi_{i,t-1} = \sum_{j=0}^{\infty} \alpha^j v_{i,t-1-j}$ . Also, from (A43) of Alvarez and Arellano (2003), we have

$$y_{i,t-1}^* = \psi_t \xi_{i,t-1} - c_t \left( \frac{\phi_{T-t} v_{it} + \dots + \phi_1 v_{i,T-1}}{T-t} \right). \quad (\text{S.4})$$

where  $\phi$  is defined in (45). Using (S.3) and (S.4), and under Assumption 1, we have

$$E(\mathbf{z}_{it}^L y_{i,t-1}^*) = \psi_t \left( \frac{\sigma_v^2}{1 - \alpha^2} \right) (\alpha^{\ell-1}, \dots, 1)', \quad (\text{S.5})$$

$$[E(\mathbf{z}_{it}^L \mathbf{z}_{it}^{L'})]^{-1} = \mathbf{V}_\ell^{-1} = \frac{1}{\sigma_v^2} \left[ (\sqrt{\lambda} \boldsymbol{\nu}_\ell) (\sqrt{\lambda} \boldsymbol{\nu}_\ell)' + \boldsymbol{\Phi}_\ell \right]^{-1} \quad (\text{S.6})$$

where  $\lambda = \sigma_\mu^2 / \sigma_v^2 = r / (1 - \alpha)^2$ ,  $\boldsymbol{\nu}_\ell$  is an  $\ell$  dimensional column vector of ones, and  $\mathbf{V}_\ell$  is the upper-left  $\ell \times \ell$  matrix of  $\mathbf{V}_T$ . The explicit expression of (S.6) is obtained as follows. By using the Sherman-Morrison-Woodbury inversion formula

$$[\mathbf{A} + \mathbf{b}\mathbf{b}']^{-1} = \mathbf{A}^{-1} - \left[ \frac{1}{1 + \mathbf{b}'\mathbf{A}^{-1}\mathbf{b}} \right] \mathbf{A}^{-1} \mathbf{b}\mathbf{b}' \mathbf{A}^{-1}$$

and the decomposition of  $\mathbf{V}_\ell^{-1}$  <sup>S.5</sup>

$$\mathbf{V}_\ell^{-1} = \mathbf{C}'\mathbf{C}$$

where

$$\mathbf{C} = \begin{bmatrix} \sqrt{1-\alpha^2} & 0 & 0 & \cdots & 0 & 0 \\ -\alpha & 1 & 0 & \cdots & 0 & 0 \\ 0 & -\alpha & 1 & \cdots & 0 & 0 \\ \vdots & \vdots & \vdots & \vdots & \vdots & \vdots \\ 0 & 0 & 0 & \cdots & -\alpha & 1 \end{bmatrix}$$

we obtain

$$[E(\mathbf{z}_{it}^L \mathbf{z}_{it}^{L'})]^{-1} = \sigma_v^{-2} \left[ \mathbf{C}'\mathbf{C} - \frac{\lambda}{1 + \lambda \boldsymbol{\iota}'_\ell \mathbf{C}' \mathbf{C} \boldsymbol{\iota}_\ell} \mathbf{C}' \mathbf{C} \boldsymbol{\iota}_\ell \boldsymbol{\iota}'_\ell \mathbf{C}' \mathbf{C} \right]. \quad (\text{S.7})$$

By substituting (S.5) and (S.7) into (36), we obtain (38). The results (39) and (40) are obtained from (38). Next, we consider  $Var(\hat{\alpha}_{GMM}^{B(1)})$ . First, note that  $y_{i,t-1}^{**}$  can be written as

$$y_{i,t-1}^{**} = c_{T-t+1}^t \left[ \xi_{i,t-1} - \frac{\xi_{i,t-2} + \cdots + \xi_{i0}}{t-1} \right]. \quad (\text{S.8})$$

Then, using (S.4) and (S.8), we obtain

$$E(y_{i,t-1}^{**} y_{i,t-1}^*) = \left( \frac{\sigma_v^2}{1-\alpha^2} \right) \psi_t c_{T-t+1}^t \left( 1 - \frac{\phi_{t-1}}{t-1} \right). \quad (\text{S.9})$$

Also, from (S.3), we obtain

$$\begin{aligned} E[(y_{i,t-1}^{**})^2] &= c_{T-t+1}^{2t} E \left[ \xi_{i,t-1} - \frac{1}{t-1} (\xi_{i,0} + \cdots + w_{i,t-2}) \right]^2 \\ &= c_{T-t+1}^{2t} \left[ \frac{\sigma_v^2}{1-\alpha^2} \left( 1 - \frac{2\alpha\phi_{t-1}}{t-1} \right) + \frac{1}{(t-1)^2} E(\xi_{i0} + \cdots + \xi_{i,t-1})^2 \right]. \end{aligned} \quad (\text{S.10})$$

Using the result of (A8) in Alvarez and Arellano (2003), we have

$$E(\xi_{i0} + \cdots + \xi_{i,t-1})^2 = \frac{\sigma_v^2}{1-\alpha^2} \left[ \frac{(t-1)(1+\alpha)}{1-\alpha} - \frac{2\alpha(1-\alpha^{t-1})}{(1-\alpha)^2} \right]. \quad (\text{S.11})$$

By substituting this into (S.10), we get

$$E[(y_{i,t-1}^{**})^2] = \left( \frac{\sigma_v^2}{1-\alpha^2} \right) c_{T-t+1}^{2t} A_t \quad (\text{S.12})$$

where  $A_t$  is defined in (46). The result (42) is obtained by substituting (S.9) and (S.12) into (36).

Next, we derive the asymptotic variances of  $\hat{\alpha}_{IV}^L$  and  $\hat{\alpha}_{IV}^B$ . Using (S.3) and (S.4) and the fact that  $v_{it}^*$  is serially uncorrelated, we obtain

$$\begin{aligned} \frac{1}{N} \sum_{i=1}^N \sum_{t=1}^{T-1} E(y_{i,t-1} y_{i,t-1}^*) &= \left( \frac{\sigma_v^2}{1-\alpha^2} \right) \sum_{t=1}^{T-1} \psi_t, \\ Var \left( \frac{1}{\sqrt{N}} \sum_{i=1}^N \sum_{t=1}^{T-1} y_{i,t-1} v_{it}^* \right) &= Var \left( \sum_{t=1}^{T-1} y_{i,t-1} v_{it}^* \right) = \sigma_v^2 \sum_{t=1}^{T-1} E(y_{i,t-1}^2) = \sigma_v^2 \sigma_\mu^2 + \frac{\sigma_v^4}{1-\alpha^2}. \end{aligned}$$

<sup>S.5</sup>See Amemiya (1985, p.164) and Hamilton (1994, p.120).

Using these, we obtain the asymptotic variance of  $\widehat{\alpha}_{IV}^L$  as in (41). The asymptotic variance of  $\widehat{\alpha}_{IV}^B$  can be derived similarly. Using (S.9) and (S.12), and under Assumption 1, we obtain

$$\begin{aligned} \frac{1}{N} \sum_{i=1}^N \sum_{t=2}^{T-1} E(y_{i,t-1}^{**} y_{i,t-1}^*) &= \left( \frac{\sigma_v^2}{1-\alpha^2} \right) \sum_{t=2}^{T-1} \psi_t c_{T-t+1}^t \left( 1 - \frac{\phi_{t-1}}{t-1} \right), \\ \text{Var} \left( \frac{1}{\sqrt{N}} \sum_{i=1}^N \sum_{t=2}^{T-1} y_{i,t-1}^{**} v_{it}^* \right) &= \text{Var} \left( \sum_{t=2}^{T-1} y_{i,t-1}^{**} v_{it}^* \right) = \sigma_v^2 \sum_{t=2}^{T-1} E[(y_{i,t-1}^{**})^2] = \left( \frac{\sigma_v^4}{1-\alpha^2} \right) \sum_{t=2}^{T-1} c_{T-t+1}^{2t} A_t. \end{aligned}$$

From these, the asymptotic variance of  $\widehat{\alpha}_{IV}^L$  is obtained as (43).

## S.4 Proof of Lemma 1 for models with time trend

We provide the proof of Lemma 1 for models with time trend.<sup>S.6</sup> First, we decompose  $T_d \times T$  matrix  $\mathbf{F}_T$  as

$$\mathbf{F}_T = \begin{bmatrix} \mathbf{F}_{11} & \mathbf{F}_{12} & \mathbf{F}_{13} \\ \mathbf{0}_{T_{2d} \times d} & \mathbf{F}_{22} & \mathbf{F}_{23} \end{bmatrix} = \{f_{st}\}, (s = 1, \dots, T_d; t = 1, \dots, T)$$

where  $\mathbf{F}_{11}$  is  $d \times d$ ,  $\mathbf{F}_{12}$  is  $d \times T_{2d}$ ,  $\mathbf{F}_{13}$  is  $d \times d$ ,  $\mathbf{F}_{22}$  is  $T_{2d} \times T_{2d}$ , and  $\mathbf{F}_{23}$  is  $T_{2d} \times d$ . Note that  $\mathbf{B}_T$  and  $\mathbf{F}_T$  have the following relationship

$$\mathbf{B}_T = \mathcal{I}_{T_d} \mathbf{F}_T \mathcal{I}_T \quad (\text{S.13})$$

where

$$\mathcal{I}_T = \begin{bmatrix} 0 & 1 \\ & \ddots \\ 1 & 0 \end{bmatrix}$$

and  $\mathcal{I}_T^2 = \mathcal{I}_T' \mathcal{I}_T = \mathbf{I}_T$ . Furthermore, using (47),  $\mathbf{W}_i$  can be written as

$$\mathbf{W}_i = \nu_T \boldsymbol{\mu}'_i + \tau_T \boldsymbol{\kappa}'_i + \boldsymbol{\Xi}_i = \mathbf{C}_T \boldsymbol{\Psi}_i + \boldsymbol{\Xi}_i$$

where  $\boldsymbol{\Xi}_i = (\boldsymbol{\xi}'_{i1}, \dots, \boldsymbol{\xi}'_{iT})'$  and  $\boldsymbol{\Psi}_i = (\boldsymbol{\mu}_i, \boldsymbol{\kappa}_i)'$ .

**Proof of (a):** Note the following decomposition:

$$\frac{1}{NT} \sum_{i=1}^N \mathbf{W}'_i \mathbf{K}'_T \mathbf{B}'_{T_d} \mathbf{F}_{T_d} \mathbf{L}_T \mathbf{W}_i = \frac{1}{NT} \sum_{i=1}^N \mathbf{W}'_i \mathbf{Q}_T \mathbf{W}_i + \frac{1}{NT} \sum_{i=1}^N \mathbf{W}'_i (\mathbf{K}'_T \mathbf{B}'_{T_d} \mathbf{F}_{T_d} \mathbf{L}_T - \mathbf{Q}_T) \mathbf{W}_i. \quad (\text{S.14})$$

Using  $\mathbf{F}_{T_d} \mathbf{L}_T \mathbf{C}_T = \mathbf{B}_{T_d} \mathbf{K}_T \mathbf{C}_T = \mathbf{Q}_T \mathbf{C}_T = \mathbf{0}$  and (20), the second term of (S.14) can be further decomposed as

$$\frac{1}{NT} \sum_{i=1}^N \mathbf{W}'_i (\mathbf{K}'_T \mathbf{B}'_{T_d} \mathbf{F}_{T_d} \mathbf{L}_T - \mathbf{Q}_T) \mathbf{W}_i = \frac{1}{NT} \sum_{i=1}^N \boldsymbol{\Xi}'_i (\mathbf{K}'_T \mathbf{B}'_{T_d} \mathbf{F}_{T_d} \mathbf{L}_T - \mathbf{I}_T) \boldsymbol{\Xi}_i + \frac{1}{NT} \sum_{i=1}^N \boldsymbol{\Xi}'_i \mathbf{R}_T \boldsymbol{\Xi}_i. \quad (\text{S.15})$$

<sup>S.6</sup>Although some equations are already introduced in the main body, we provide them for completeness.

To consider the first term of right-hand side of (S.15), we derive the explicit form of  $\mathbf{A}_T = \mathbf{K}'_T \mathbf{B}'_{T_d} \mathbf{F}_{T_d} \mathbf{L}_T - \mathbf{I}_T$ . Using (S.13),  $\mathbf{F}_{T_d} = \mathbf{L}_{T_d} \mathbf{F}_T \mathbf{L}'_T$  and

$$\begin{aligned} \mathbf{K}'_T \mathcal{I}_{T_d} \mathbf{L}_T &= \begin{bmatrix} \mathbf{0}_{d \times d} & \mathbf{0}_{d \times T_{2d}} & \mathcal{I}_d \\ \mathbf{0}_{T_{2d} \times d} & \mathcal{I}_{T_{2d}} & \mathbf{0}_{T_{2d} \times d} \\ \mathbf{0}_{d \times d} & \mathbf{0}_{d \times T_{2d}} & \mathbf{0}_{d \times d} \end{bmatrix}, & \mathbf{L}'_{T_d} \mathcal{I}_{T_{2d}} \mathbf{L}_{T_d} &= \begin{bmatrix} \mathbf{0}_{d \times d} & \mathbf{0}_{d \times T_{2d}} \\ \mathbf{0}_{T_{2d} \times d} & \mathcal{I}_{T_{2d}} \end{bmatrix}, \\ \mathbf{L}'_T \mathbf{L}_T &= \begin{bmatrix} \mathbf{0}_{d \times d} & \mathbf{0}_{d \times T_{2d}} & \mathbf{0}_{d \times d} \\ \mathbf{0}_{T_{2d} \times d} & \mathbf{I}_{T_{2d}} & \mathbf{0}_{T_{2d} \times d} \\ \mathbf{0}_{d \times d} & \mathbf{0}_{d \times T_{2d}} & \mathbf{I}_d \end{bmatrix}, \end{aligned}$$

we have

$$\begin{aligned} \mathbf{A}_T &= \mathbf{K}'_T \mathbf{B}'_{T_d} \mathbf{L}_{T_d} \mathbf{F}_T \mathbf{L}'_T \mathbf{L}_T - \mathbf{I}_T = \mathbf{K}'_T \mathcal{I}_{T_d} \mathbf{F}'_{T_d} \mathcal{I}_{T_{2d}} \mathbf{L}_{T_d} \mathbf{F}_T \mathbf{L}'_T \mathbf{L}_T - \mathbf{I}_T \\ &= (\mathbf{K}'_T \mathcal{I}_{T_d} \mathbf{L}_T) \mathbf{F}'_T (\mathbf{L}'_{T_d} \mathcal{I}_{T_{2d}} \mathbf{L}_{T_d}) \mathbf{F}_T (\mathbf{L}'_T \mathbf{L}_T) - \mathbf{I}_T \\ &= \begin{bmatrix} -\mathbf{I}_d & \mathcal{I}_d \mathbf{F}'_{23} \mathcal{I}_{T_{2d}} \mathbf{F}_{22} & \mathcal{I}_d \mathbf{F}'_{23} \mathcal{I}_{T_{2d}} \mathbf{F}_{23} \\ \mathbf{0}_{T_{2d} \times d} & \mathcal{I}_{T_{2d}} \mathbf{F}'_{22} \mathcal{I}_{T_{2d}} \mathbf{F}_{22} - \mathbf{I}_{T_{2d}} & \mathcal{I}_{T_{2d}} \mathbf{F}'_{22} \mathcal{I}_{T_{2d}} \mathbf{F}_{23} \\ \mathbf{0}_{d \times d} & \mathbf{0}_{d \times T_{2d}} & -\mathbf{I}_d \end{bmatrix} \quad (\text{S.16}) \\ &= \{\mathbf{A}_{ij}\}, (i, j = 1, 2, 3). \end{aligned}$$

Next, we derive the form of each  $\mathbf{A}_{ij}$ . Using

$$\begin{aligned} \mathcal{I}_{T_{2d}} \mathbf{F}_{22} &= \begin{bmatrix} 0 & \cdots & 0 & f_{T_d T_d} \\ \vdots & \ddots & \ddots & \vdots \\ 0 & f_{d+2, d+2} & \cdots & f_{d+2, T_d} \\ f_{d+1, d+1} & f_{d+1, d+2} & \cdots & f_{d+1, T_d} \end{bmatrix}, & \mathcal{I}_{T_{2d}} \mathbf{F}'_{22} &= \begin{bmatrix} f_{d+1, T_d} & f_{d+2, T_d} & \cdots & f_{T_d T_d} \\ \vdots & \vdots & \ddots & 0 \\ f_{d+1, d+2} & f_{d+2, d+2} & & \vdots \\ f_{d+1, d+1} & 0 & \cdots & 0 \end{bmatrix}, \\ \mathcal{I}_{T_{2d}} \mathbf{F}_{23} &= \begin{bmatrix} f_{T_d, T_d+1} & f_{T_d, T} \\ \vdots & \vdots \\ f_{d+2, T_d+1} & f_{d+2, T} \\ f_{d+1, T_d+1} & f_{d+1, T} \end{bmatrix}, & \mathcal{I}_d \mathbf{F}'_{23} &= \begin{bmatrix} f_{d+1, T} & f_{d+2, T} & \cdots & f_{T_d, T} \\ f_{d+1, T_d+1} & f_{d+2, T_d+1} & \cdots & f_{T_d, T_d+1} \end{bmatrix} \end{aligned}$$

we have

$$\begin{aligned} \mathbf{A}_{12} &= \mathcal{I}_d \mathbf{F}'_{23} \mathcal{I}_{T_{2d}} \mathbf{F}_{22} = \{a_{12}^{jk}\} \\ &= \begin{bmatrix} f_{T_d, T} f_{d+1, d+1} & f_{T_d-1, T} f_{d+2, d+2} + f_{T_d, T} f_{d+1, d+2} & \cdots & \sum_{\ell=1}^{T_{2d}} f_{d+\ell, T} f_{T_d-\ell+1, T_d} \\ f_{T_d, T_d+1} f_{d+1, d+1} & f_{T_d-1, T_d+1} f_{d+2, d+2} + f_{T_d, T_d+1} f_{d+1, d+2} & \cdots & \sum_{\ell=1}^{T_{2d}} f_{d+\ell, T_d+1} f_{T_d-\ell+1, T_d} \end{bmatrix} \end{aligned}$$

with

$$\begin{aligned} \{a_{12}^{jk}\} &= \sum_{\ell=1}^k f_{T_d-\ell+1, T-j+1} f_{d+\ell, d+k} = \sum_{\ell=1}^{k-1} f_{T_d-\ell+1, T-j+1} f_{d+\ell, d+k} + f_{T_d-k+1, T-j+1} f_{d+k, d+k} \\ &= \sum_{\ell=1}^{k-1} \frac{4c_{\ell+2}^T c_{T-\ell-1}^T (3j-\ell-3) (2T-3k+\ell-3)}{\ell(\ell+1)(T-\ell-2)(T-\ell-3)} - \frac{2c_{k+2}^T c_{T-k-1}^T (3j-k-3)}{k(k+1)} \\ &= O\left(\frac{\log T}{T}\right), \quad \text{for } (j=1, 2; k=1, \dots, T_{2d}). \end{aligned}$$

$$\mathbf{A}_{13} = \mathcal{I}_d \mathbf{F}'_{23} \mathcal{I}_{T_{2d}} \mathbf{F}_{23} = \{a_{13}^{jk}\} = \begin{bmatrix} \sum_{\ell=1}^{T_{2d}} f_{d+\ell, T} f_{T_d-\ell+1, T_d+1} & \sum_{\ell=1}^{T_{2d}} f_{d+\ell, T} f_{T_d-\ell+1, T} \\ \sum_{\ell=1}^{T_{2d}} f_{d+\ell, T_d+1} f_{T_d-\ell+1, T_d+1} & \sum_{\ell=1}^{T_{2d}} f_{d+\ell, T_d+1} f_{T_d-\ell+1, T} \end{bmatrix}$$

with

$$\begin{aligned} \left\{ a_{13}^{jk} \right\} &= \sum_{\ell=1}^{T_{2d}} f_{d+\ell, T-j+1} f_{T_d-\ell+1, T_d+k} = \sum_{\ell=1}^{T_{2d}} \frac{4c_{\ell+2}^{\tau} c_{T-\ell-1}^{\tau} (3k + \ell - 6) (T - 3j - \ell)}{\ell(\ell+1)(T-\ell-2)(T-\ell-3)} \\ &= O\left(\frac{\log T}{T}\right) \quad \text{for } j = 1, 2; k = 1, 2. \end{aligned}$$

$$\mathbf{A}_{22} \underset{(T_{2d} \times T_{2d})}{=} \mathcal{I}_{T_{2d}} \mathbf{F}'_{22} \mathcal{I}_{T_{2d}} \mathbf{F}_{22} - \mathbf{I}_{T_{2d}} = \left\{ a_{22}^{jk} \right\} = \begin{bmatrix} a_{22}^{11} & a_{22}^{12} & \cdots & a_{22}^{1, T_{2d}} \\ 0 & a_{22}^{22} & \cdots & a_{22}^{2, T_{2d}} \\ \vdots & \ddots & \ddots & \vdots \\ 0 & \cdots & 0 & a_{22}^{T_{2d}, T_{2d}} \end{bmatrix}$$

with

$$\begin{aligned} \left\{ a_{22}^{jk} \right\} &= \begin{cases} 0 & \text{if } j > k \\ f_{T_d-j+1, T_d-j+1} f_{d+j, d+j} - 1 & \text{if } j = k \\ \sum_{\ell=1}^k f_{T_d-\ell+1, T_d-j+1} f_{d+\ell, d+k} & \text{if } j < k \end{cases} \\ &= \begin{cases} 0 & \text{if } j > k \\ c_{T-j-1}^{\tau} c_{j+2}^{\tau} - 1 = O\left(\frac{1}{j}\right) + O\left(\frac{1}{(T-j)}\right) & \text{if } j = k \\ -\frac{2c_{j+2}^{\tau} c_{T-j-1}^{\tau} (2T+j-3k-3)}{(T-j-2)(T-j-3)} - \frac{\sum_{\ell=1, \ell > j, \ell < k}^k \frac{4c_{\ell+2}^{\tau} c_{T-\ell-1}^{\tau} (3j-\ell+3)(2T-3k+\ell-3)}{\ell(\ell+1)(T-\ell-2)(T-\ell-3)}}{k(k+1)} & \text{if } j < k \end{cases} \\ &\quad (j, k = 1, \dots, T_{2d}) \end{aligned}$$

$$\mathbf{A}_{23} \underset{(T_{2d} \times d)}{=} \mathcal{I}_{T_{2d}} \mathbf{F}'_{22} \mathcal{I}_{T_{2d}} \mathbf{F}_{23} = \left\{ a_{23}^{jk} \right\} = \begin{bmatrix} \sum_{\ell=1}^{T_{2d}} f_{d+\ell, T_d} f_{T_d-\ell+1, T_d+1} & \sum_{\ell=1}^{T_{2d}} f_{d+\ell, T_d} f_{T_d-\ell+1, T} \\ \vdots & \vdots \\ \sum_{\ell=1}^2 f_{d+\ell, d+2} f_{T_d-\ell+1, T_d+1} & \sum_{\ell=1}^2 f_{d+\ell, d+2} f_{T_d-\ell+1, T} \\ \sum_{\ell=1}^1 f_{d+\ell, d+1} f_{T_d-\ell+1, T_d+1} & \sum_{\ell=1}^1 f_{d+\ell, d+1} f_{T_d-\ell+1, T} \end{bmatrix}$$

with

$$\begin{aligned} \left\{ a_{23}^{jk} \right\} &= \sum_{\ell=1}^{T_{2d}-j+1} f_{d+\ell, T_d-j+1} f_{T_d-\ell+1, T_d+k} = \sum_{\ell=1}^{T_{2d}-j} f_{d+\ell, T_d-j+1} f_{T_d-\ell+1, T_d+k} + f_{T_d-j+1, T_d-j+1} f_{d+j, T_d+k} \\ &= \sum_{\ell=1}^{T_{2d}-j} \frac{4c_{\ell+2}^{\tau} c_{T-\ell-1}^{\tau} (3k + \ell - 6) (T - 3j - \ell - 6)}{\ell(\ell+1)(T-\ell-2)(T-\ell-3)} + \frac{2c_{j+2}^{\tau} c_{T-j-1}^{\tau} (T - j + 3k - 9)}{(T - j - 2)(T - j - 3)} \\ &= O\left(\frac{\log T}{T}\right) \quad \text{for } j = 1, \dots, T_{2d}; k = 1, 2. \end{aligned}$$

We now assess the first term of (S.15). Using  $\Xi_i = (\Xi_{1i}, \Xi_{2i}, \Xi_{3i})'$  where  $\Xi_{1i}$  is  $d \times k$ ,  $\Xi_{2i}$  is  $T_{2d} \times k$ , and  $\Xi_{3i}$  is  $d \times k$ , we have

$$\mathbf{S}_i = \Xi_i' \mathbf{A}_T \Xi_i = \mathbf{S}_{1i} + \mathbf{S}_{2i} + \mathbf{S}_{3i} + \mathbf{S}_{4i} + \mathbf{S}_{5i} + \mathbf{S}_{6i}$$

where

$$\begin{aligned} \mathbf{S}_{1i} &= -\Xi_{1i}' \Xi_{1i}, & \mathbf{S}_{2i} &= \Xi_{1i}' \mathbf{A}_{12} \Xi_{2i}, & \mathbf{S}_{3i} &= \Xi_{1i}' \mathbf{A}_{13} \Xi_{3i}, & \mathbf{S}_{4i} &= \Xi_{2i}' \mathbf{A}_{22} \Xi_{2i}, \\ \mathbf{S}_{5i} &= \Xi_{2i}' \mathbf{A}_{23} \Xi_{3i}, & \mathbf{S}_{6i} &= -\Xi_{3i}' \Xi_{3i}. \end{aligned}$$

We now evaluate each term. From the definition of  $\Xi_{1i}$ , we have

$$E(\mathbf{S}_{1i}) = -E(\xi_{i1}\xi'_{i1}) - E(\xi_{i2}\xi'_{i2}) = -2\Gamma_{i0} = O(1).$$

Since  $a_{12}^{1,t-1}$ ,  $a_{12}^{2,t-1}$ ,  $a_{13}^{1k}$  and  $a_{13}^{2k}$  are  $O\left(\frac{\log T}{T}\right)$  for all  $t$  and  $k$ , using Assumption 3, we have

$$\begin{aligned} E(\mathbf{S}_{2i}) &= \sum_{t=2}^{T_d} \left[ a_{12}^{1,t-1} E(\xi_{i1}\xi'_{it}) + a_{12}^{2,t-1} E(\xi_{i2}\xi'_{it}) \right] \\ &= O\left(\frac{\log T}{T}\right) \sum_{t=2}^{T_1} \Gamma_{i,t-1} + O\left(\frac{\log T}{T}\right) \sum_{t=2}^{T_1} \Gamma_{i,t-2} = O\left(\frac{\log T}{T}\right), \end{aligned}$$

$$\begin{aligned} E(\mathbf{S}_{3i}) &= \sum_{t=T-1}^T \left[ \left( a_{13}^{1,1} + a_{13}^{1,2} \right) E(\xi_{i1}\xi'_{it}) + \left( a_{13}^{2,1} + a_{13}^{2,2} \right) E(\xi_{i2}\xi'_{it}) \right] \\ &= O\left(\frac{\log T}{T}\right) (\Gamma_{i,T-1} + 2\Gamma_{i,T-2} + \Gamma_{i,T-3}) = O\left(\frac{\log T}{T}\right). \end{aligned}$$

Similarly, using  $a_{22}^{t-1,t-1} = O(1/(t+1)) + O(1/(T-t))$  and  $a_{22}^{s-1,t-1} = O(\log T/T)$  for all  $s \neq t$ , we have

$$\begin{aligned} E(\mathbf{S}_{4i}) &= \sum_{s=3}^{T_d} \sum_{t=3}^{T_d} a_{22}^{s-1,t-1} E(\xi_{is}\xi'_{it}) = \sum_{t=3}^{T_d} a_{22}^{t-1,t-1} E(\xi_{it}\xi'_{it}) + \sum_{s=3}^{T_d-1} \sum_{t=s+1}^{T_d} a_{22}^{s-1,t-1} E(\xi_{is}\xi'_{it}) \\ &= \sum_{t=3}^{T_d} \left[ O\left(\frac{1}{t+1}\right) + O\left(\frac{1}{T-t}\right) \right] E(\xi_{it}\xi'_{it}) + O\left(\frac{\log T}{T}\right) \sum_{s=3}^{T_d-1} \sum_{t=s+1}^{T_d} \Gamma_{t-s,i} \\ &= O(\log T). \end{aligned}$$

Finally, using  $a_{23}^{t-1,1} = O(\log T/T)$  and  $a_{23}^{t-1,2} = O(\log T/T)$  for all  $t$ , and the definition of  $\Xi_{3i}$ , we have

$$\begin{aligned} E(\mathbf{S}_{5i}) &= \sum_{t=2}^{T_d} a_{23}^{t-1,1} E(\xi_{it}\xi'_{iT_1}) + \sum_{t=2}^{T_d} a_{23}^{t-1,2} E(\xi_{it}\xi'_{iT}) \\ &= \sum_{t=2}^{T_d} O\left(\frac{\log T}{T}\right) (\Gamma_{i,T-t-1} + \Gamma_{i,T-t}) = O\left(\frac{\log T}{T}\right), \end{aligned}$$

$$E(\mathbf{S}_{6i}) = -E(\xi_{iT}\xi'_{iT}) - E(\xi_{iT_1}\xi'_{iT_1}) = -2\Gamma_{i0} = O(1).$$

Thus, we have  $\mathbf{S}_i = \sum_{l=1}^6 \mathbf{S}_{li} = O(\log T)$  for all  $i$  and obtain

$$\frac{1}{NT} \sum_{i=1}^N \Xi'_i \mathbf{A}_T \Xi_i = O_p\left(\frac{\log T}{T}\right). \quad (\text{S.17})$$

Next, we consider the second term of (S.15). Let us define  $\mathbf{H}_i = \Xi'_i \mathbf{R}_T \Xi_i$ . Then, using (21), we have

$$\begin{aligned} \mathbf{H}_i &= \frac{2(2T+1)}{T(T-1)} \Xi'_i \boldsymbol{\nu}_T \boldsymbol{\nu}'_T \Xi_i + \frac{12\Xi'_i \boldsymbol{\tau}_T \boldsymbol{\tau}'_T \Xi_i}{T(T-1)(T+1)} - \frac{6(\Xi'_i \boldsymbol{\nu}_T \boldsymbol{\tau}'_T \Xi_i + \Xi'_i \boldsymbol{\tau}_T \boldsymbol{\nu}'_T \Xi_i)}{T(T-1)} \\ &= \mathbf{H}_{1i} + \mathbf{H}_{2i} + \mathbf{H}_{3i}. \end{aligned}$$

Using Assumption 3 and (54), we have

$$\begin{aligned}
E(\mathbf{H}_{1i}) &= \frac{2(2T+1)}{T(T-1)} E \left[ \left( \sum_{t=1}^T \boldsymbol{\xi}_{it} \right) \left( \sum_{s=1}^T \boldsymbol{\xi}'_{is} \right) \right] = O(1), \\
E(\mathbf{H}_{2i}) &= \frac{12}{T(T-1)(T+1)} E \left( \left( \sum_{t=1}^T t \boldsymbol{\xi}_{it} \right) \left( \sum_{s=1}^T s \boldsymbol{\xi}'_{is} \right) \right) \\
&= \frac{12T}{(T-1)(T+1)} \sum_{s=1}^T \sum_{t=1}^T \left( \frac{t}{T} \right) \left( \frac{s}{T} \right) E(\boldsymbol{\xi}_{it} \boldsymbol{\xi}'_{is}) = O(1), \\
E(\mathbf{H}_{3i}) &= \frac{6}{T(T-1)} \left( \sum_{t=1}^T \sum_{s=1}^T s E(\boldsymbol{\xi}_{it} \boldsymbol{\xi}'_{is}) + \sum_{t=1}^T \sum_{s=1}^T t E(\boldsymbol{\xi}_{it} \boldsymbol{\xi}'_{is}) \right) \\
&= \frac{6}{(T-1)} \left( \sum_{s=1}^T \sum_{t=1}^T \left( \frac{s}{T} \right) E(\boldsymbol{\xi}_{it} \boldsymbol{\xi}'_{is}) + \sum_{s=1}^T \sum_{t=1}^T \left( \frac{t}{T} \right) E(\boldsymbol{\xi}_{it} \boldsymbol{\xi}'_{is}) \right) = O(1)
\end{aligned}$$

where we used  $0 < t/T \leq 1$  and  $0 < s/T \leq 1$  for all  $s$  and  $t$ . Hence, for each  $i$ , we have  $E(\mathbf{H}_i) = O(1)$  and obtain

$$\frac{1}{NT} \sum_{i=1}^N \boldsymbol{\Xi}'_i \mathbf{R}_T \boldsymbol{\Xi}_i = O_p \left( \frac{1}{T} \right). \tag{S.18}$$

By combining (S.17) and (S.18), we obtain

$$\frac{1}{NT} \sum_{i=1}^N \mathbf{W}'_i \mathbf{K}'_T \mathbf{B}'_{T_d} \mathbf{F}_{T_d} \mathbf{L}_T \mathbf{W}_i = \frac{1}{NT} \sum_{i=1}^N \mathbf{W}'_i \mathbf{Q}_T \mathbf{W}_i + O_p \left( \frac{\log T}{T} \right).$$

**Proof of (b):** Using  $\mathbf{Q}_T(\boldsymbol{\nu}_T, \boldsymbol{\tau}_T) = \mathbf{0}$ , we have

$$\frac{1}{\sqrt{NT}} \sum_{i=1}^N \mathbf{W}'_i \mathbf{Q}_T \mathbf{v}_i = \frac{1}{\sqrt{NT}} \sum_{i=1}^N \boldsymbol{\Xi}'_i \mathbf{Q}_T \mathbf{v}_i = \frac{1}{\sqrt{NT}} \sum_{i=1}^N \boldsymbol{\Xi}'_i \mathbf{v}_i - \frac{1}{\sqrt{NT}} \sum_{i=1}^N \boldsymbol{\Xi}'_i \mathbf{R}_T \mathbf{v}_i.$$

The first term converges in distribution to  $\mathcal{N}(\mathbf{0}, \boldsymbol{\Omega})$  by Assumption 4. To assess the second term, let us define  $\mathbf{h}_i = -\boldsymbol{\Xi}'_i \mathbf{R}_T \mathbf{v}_i$ . Then, for the trend model, we have

$$\begin{aligned}
\mathbf{h}_i &= -\frac{2(2T+1) \boldsymbol{\Xi}'_i \boldsymbol{\nu}_T \boldsymbol{\nu}'_T \mathbf{v}_i}{T(T-1)} - \frac{12 \boldsymbol{\Xi}'_i \boldsymbol{\tau}_T \boldsymbol{\tau}'_T \mathbf{v}_i}{T(T-1)(T+1)} + \frac{6(\boldsymbol{\Xi}'_i \boldsymbol{\nu}_T \boldsymbol{\tau}'_T \mathbf{v}_i + \boldsymbol{\Xi}'_i \boldsymbol{\tau}_T \boldsymbol{\nu}'_T \mathbf{v}_i)}{T(T-1)} \\
&= -\mathbf{h}_{1i} - \mathbf{h}_{2i} + \mathbf{h}_{3i}.
\end{aligned}$$

Using Assumption 3 and (56), we have

$$\begin{aligned}
E(\mathbf{h}_{1i}) &= \frac{2(2T+1)}{T(T-1)} E \left[ \left( \sum_{t=1}^T \boldsymbol{\xi}_{it} \right) \left( \sum_{s=1}^T v_{is} \right) \right] = \frac{2(2T+1)}{T(T-1)} \sum_{s=1}^{T-1} \sum_{t=s+1}^T \phi_{i,t-s} = O(1), \\
E(\mathbf{h}_{2i}) &= \frac{12}{T(T-1)(T+1)} E \left( \left( \sum_{t=1}^T t \boldsymbol{\xi}_{it} \right) \left( \sum_{s=1}^T s v_{is} \right) \right) \\
&= \frac{12}{(T+1)} \left( \sum_{s=1}^{T-1} \sum_{t=s+1}^T \left( \frac{t}{T} \right) \left( \frac{s}{T-1} \right) \phi_{i,t-s} \right) = O(1), \\
E(\mathbf{h}_{3i}) &= \frac{6}{T(T-1)} \left( \sum_{t=1}^T \sum_{s=1}^T s E(\boldsymbol{\xi}_{it} v_{is}) + \sum_{t=1}^T \sum_{s=1}^T t E(\boldsymbol{\xi}_{it} v_{is}) \right)
\end{aligned}$$

$$= \frac{6}{T} \sum_{s=1}^{T-1} \sum_{t=s+1}^T \left( \frac{s}{T-1} \right) \phi_{i,t-s} + \frac{6}{(T-1)} \sum_{s=1}^{T-1} \sum_{s=t+1}^T \left( \frac{t}{T} \right) \phi_{i,t-s} = O(1)$$

where we used  $0 < t/T \leq 1$  and  $0 < s/(T-1) \leq 1$  for all  $s$  and  $t$ . Thus,  $E(\mathbf{h}_i) = O(1)$  and obtain

$$\frac{1}{\sqrt{NT}} \sum_{i=1}^N \Xi_i' \mathbf{R}_T \mathbf{v}_i = \sqrt{\frac{N}{T}} \bar{\mathbf{h}}_N = O_p \left( \sqrt{\frac{N}{T}} \right)$$

where  $\bar{\mathbf{h}}_N = N^{-1} \sum_{i=1}^N \mathbf{h}_i$ .

**Proof of (c):** Noting  $\mathbf{B}_{T_d} \mathbf{K}_T \mathbf{C}_T = \mathbf{0}$ , we have the following decomposition:

$$\begin{aligned} \frac{1}{\sqrt{NT}} \sum_{i=1}^N \mathbf{W}_i' \mathbf{K}_T' \mathbf{B}_{T_d}' \mathbf{F}_{T_d} \mathbf{L}_T \mathbf{v}_i &= \frac{1}{\sqrt{NT}} \sum_{i=1}^N \Xi_i' \mathbf{K}_T' \mathbf{B}_{T_d}' \mathbf{F}_{T_d} \mathbf{L}_T \mathbf{v}_i \\ &= \frac{1}{\sqrt{NT}} \sum_{i=1}^N \Xi_i' \mathbf{v}_i + \frac{1}{\sqrt{NT}} \sum_{i=1}^N \Xi_i' \mathbf{A}_T \mathbf{v}_i. \end{aligned}$$

The first term converges in distribution to  $\mathcal{N}(\mathbf{0}, \mathbf{\Omega})$  by Assumption 4. To derive the order of the second term, let us define  $\mathbf{s}_i = \Xi_i' \mathbf{A}_T \mathbf{v}_i$ . Then, using (S.16), and  $\mathbf{v}_i = (\mathbf{v}_{i1}', \mathbf{v}_{i2}', \mathbf{v}_{i3}')'$  where  $\mathbf{v}_{i1}$  and  $\mathbf{v}_{i3}$  are  $d \times 1$  and  $\mathbf{v}_{i2}$  is  $T_{2d} \times 1$ ,  $\mathbf{s}_i$  can be decomposed as

$$\mathbf{s}_i = \mathbf{s}_{1i} + \mathbf{s}_{2i} + \mathbf{s}_{3i} + \mathbf{s}_{4i} + \mathbf{s}_{5i} + \mathbf{s}_{6i}$$

where

$$\begin{aligned} \mathbf{s}_{1i} &= -\Xi_{1i}' \mathbf{v}_{1i}, & \mathbf{s}_{2i} &= \Xi_{1i}' \mathbf{A}_{12} \mathbf{v}_{2i}, & \mathbf{s}_{3i} &= \Xi_{1i}' \mathbf{A}_{13} \mathbf{v}_{3i}, & \mathbf{s}_{4i} &= \Xi_{2i}' \mathbf{A}_{22} \mathbf{v}_{2i}, \\ \mathbf{s}_{5i} &= \Xi_{2i}' \mathbf{A}_{23} \mathbf{v}_{3i}, & \mathbf{s}_{6i} &= -\Xi_{3i}' \mathbf{v}_{3i}. \end{aligned}$$

To derive the variance of  $\mathbf{s}_i$ , we need to calculate  $Var(\mathbf{s}_{ki})$  and  $Cov(\mathbf{s}_{ki}, \mathbf{s}_{li})$ , ( $k \neq l$ ) for  $k, l = 1, \dots, 6$ . We have

$$Var(\mathbf{s}_{1i}) = Var\left(\sum_{s=1}^2 \sum_{t=1}^2 \xi_{it} v_{is}\right) = Var(\xi_{i1} v_{i1}) + Var(\xi_{i2} v_{i2}) = O(1).$$

Using  $a_{12}^{s,t-1} = O\left(\frac{\log T}{T}\right)$ ,  $s = 2$  for all  $t$  and  $a_{13}^{jk} = O\left(\frac{\log T}{T}\right)$ , we have

$$Var(\mathbf{s}_{2i}) = Var\left(\sum_{s=1}^2 \sum_{t=3}^{T_{2d}} a_{12}^{j,t-1} \xi_{i1} v_{it}\right) = O\left(\frac{(\log T)^2}{T}\right),$$

$$Var(\mathbf{s}_{3i}) = Var\left(\sum_{s=1}^2 \sum_{t=1}^2 a_{13}^{st} \xi_{it} v_{iT_s+1}\right) = \sum_{s=1}^2 \sum_{t=1}^2 (a_{13}^{st})^2 Var(\xi_{it} v_{iT_s+1}) = O\left(\frac{(\log T)^2}{T^2}\right).$$

Similarly, using  $a_{22}^{t-1,t-1} = O(1/(t+1)) + O(1/(T-t))$  and  $a_{22}^{s-1,t-1} = O(\log T/T)$  for all  $s \neq t$ , we have

$$Var(\mathbf{s}_{4i}) = Var\left[\sum_{s=3}^{T_d-1} \sum_{t=s}^{T_d} a_{22}^{s-1,t-1} \xi_{is} v_{it}\right] = \sum_{s=3}^{T_d-1} \sum_{t=s}^{T_d} (a_{22}^{s-1,t-1})^2 Var(\xi_{is} v_{it})$$

$$\begin{aligned}
&= \sum_{t=3}^{T_d} (a_{22}^{t-1,t-1})^2 \text{Var}(\boldsymbol{\xi}_{it} v_{it}) + \sum_{s=3}^{T_d-1} \sum_{t=s+1}^{T_d} (a_{22}^{s-1,t-1})^2 \text{Var}(\boldsymbol{\xi}_{is} v_{it}) \\
&= O(1) + O((\log T)^2).
\end{aligned}$$

Finally, using  $a_{23}^{t-1,s} = O(\log T/T)$ ,  $s = 1, 2$  for all  $t$ , and the definition of  $\boldsymbol{\Xi}_{3i}$ , we have

$$\begin{aligned}
\text{Var}(\mathbf{s}_{5i}) &= \text{Var}\left(\sum_{s=1}^2 \sum_{t=3}^{T_d} a_{23}^{t-1,s} \boldsymbol{\xi}_{it} v_{iT_s+1}\right) \\
&= \sum_{s=1}^2 \sum_{t=2}^{T_d} (a_{23}^{t-1,s})^2 \text{Var}(\boldsymbol{\xi}_{it} v_{iT_s+1}) = O\left(\frac{(\log T)^2}{T}\right),
\end{aligned}$$

$$\text{Var}(\mathbf{s}_{6i}) = \text{Var}\left(\sum_{s=1}^2 \sum_{t=1}^2 \boldsymbol{\xi}_{iT_t} v_{iT_s}\right) = O(1).$$

For the covariances of trend model,

$$\begin{aligned}
&\text{Cov}(\mathbf{s}_{1i}, \mathbf{s}_{2i}) = \text{Cov}(\mathbf{s}_{1i}, \mathbf{s}_{3i}) = \text{Cov}(\mathbf{s}_{1i}, \mathbf{s}_{4i}) = \text{Cov}(\mathbf{s}_{1i}, \mathbf{s}_{5i}) = \text{Cov}(\mathbf{s}_{1i}, \mathbf{s}_{6i}) = \text{Cov}(\mathbf{s}_{2i}, \mathbf{s}_{3i}) \\
&= \text{Cov}(\mathbf{s}_{2i}, \mathbf{s}_{5i}) = \text{Cov}(\mathbf{s}_{2i}, \mathbf{s}_{6i}) = \text{Cov}(\mathbf{s}_{3i}, \mathbf{s}_{4i}) = \text{Cov}(\mathbf{s}_{4i}, \mathbf{s}_{5i}) = \text{Cov}(\mathbf{s}_{4i}, \mathbf{s}_{6i}) = \mathbf{0},
\end{aligned}$$

$$\begin{aligned}
\text{Cov}(\mathbf{s}_{2i}, \mathbf{s}_{4i}) &= E\left[\left(\sum_{s=1}^2 \sum_{t=2}^{T_d} a_{12}^{s,t-1} \boldsymbol{\xi}_{is} v_{it}\right) \left(\sum_{t=3}^{T_d} a_{22}^{t-1,t-1} \boldsymbol{\xi}_{it} v_{it} + \sum_{s=3}^{T_d-1} \sum_{t=s+1}^{T_d} a_{22}^{s-1,t-1} \boldsymbol{\xi}_{is} v_{it}\right)\right] \\
&= \sum_{s=1}^2 \sum_{t_1=3}^{T_d} \sum_{t_2=3}^{T_d} a_{12}^{1,t_1-1} a_{22}^{t_2-1,t_2-1} E(\boldsymbol{\xi}_{is} \boldsymbol{\xi}'_{it_2} v_{it_1} v_{it_2}) \\
&+ \sum_{s_1=1}^2 \sum_{t_1=3}^{T_d} \sum_{s_2=3}^{T_d-1} \sum_{t_2=s_2+1}^{T_d} a_{12}^{1,t_1-1} a_{22}^{s_2-1,t_2-1} E(\boldsymbol{\xi}_{is_1} \boldsymbol{\xi}'_{is_2} v_{it_1} v_{it_2}) \\
&= \sum_{s=1}^2 \sum_{t=3}^{T_d} a_{12}^{s,t-1} a_{22}^{t-1,t-1} E(\boldsymbol{\xi}_{is} \boldsymbol{\xi}'_{it} v_{it}^2) + \sum_{s_1=1}^2 \sum_{s_2=2}^{T_d-1} \sum_{t=s_2+1}^{T_d} a_{12}^{s_1,t-1} a_{22}^{s_2-1,t-1} E(\boldsymbol{\xi}_{is_1} \boldsymbol{\xi}'_{is_2} v_{it}^2) \\
&= O\left(\frac{(\log T)^2}{T}\right) + O((\log T)^2),
\end{aligned}$$

$$\text{Cov}(\mathbf{s}_{3i}, \mathbf{s}_{5i}) = \sum_{s_1=1}^2 \sum_{s_2=1}^2 \sum_{t=3}^{T_d} a_{13}^{s_1 s_2 1} a_{23}^{t-1,s_2} E(\boldsymbol{\xi}_{is_1} \boldsymbol{\xi}'_{it} v_{iT_{s_1+1}}^2) = O\left(\frac{(\log T)^2}{T}\right),$$

$$\text{Cov}(\mathbf{s}_{3i}, \mathbf{s}_{6i}) = \sum_{s_1=1}^2 \sum_{s_2=1}^2 a_{13}^{s_1 s_2 2} E(\boldsymbol{\xi}_{is_1} \boldsymbol{\xi}'_{iT_{s_2+1}} v_{iT_{s_1+1}}^2) = O\left(\frac{\log T}{T}\right),$$

$$\text{Cov}(\mathbf{s}_{5i}, \mathbf{s}_{6i}) = \sum_{s=1}^2 \sum_{t=3}^{T_d} a_{23}^{t-1,s} E(\boldsymbol{\xi}_{it} \boldsymbol{\xi}'_{iT_s+1} v_{iT_s+1}^2) = O(\log T).$$

Therefore, for trend model, we have  $\text{Var}(\mathbf{s}_i) = O((\log T)^2)$ , and

$$\text{Var}\left(\frac{1}{\sqrt{NT}} \sum_{i=1}^N \boldsymbol{\Xi}'_i \mathbf{A}_T \mathbf{v}_i\right) = \frac{1}{NT} \sum_{i=1}^N \text{Var}(\mathbf{s}_i) = O\left(\frac{(\log T)^2}{T}\right).$$

Hence, it follows that  $\frac{1}{\sqrt{NT}} \sum_{i=1}^N \boldsymbol{\Xi}'_i \mathbf{A}_T \mathbf{v}_i = O_p(\log T/\sqrt{T}) = o_p(1)$ .

## S.5 Monte Carlo simulation

### S.5.1 AR(1) model

In this supplement, we provide the Monte Carlo simulation results for AR(1) model given by

$$\begin{aligned}y_{it} &= \alpha y_{i,t-1} + \eta_i + v_{it}, & (t = 1, \dots, T; i = 1, \dots, N) \\y_{i0} &= \frac{\eta_i}{1 - \alpha} + e_{i0}\end{aligned}$$

where  $v_{it} \sim iidN(0, \sigma_v^2)$ ,  $\eta_i \sim iidN(0, \sigma_\eta^2)$ ,  $e_{i0} \sim iidN(0, \sigma_v^2/(1 - \alpha^2))$ . For parameter values, we consider  $\alpha = \{0.4, 0.8\}$ ,  $\sigma_v^2 = 1$ ,  $\sigma_\eta^2 = \{1, 5\}$  and for the sample size, we consider  $T = \{10, 20, 50, 100\}$  and  $N = \{50, 100, 200, 500\}$ . In addition to the estimators considered for a model with weakly exogenous regressor  $x_{it}$ , we include the bias-corrected FE estimator due to Hahn and Kuersteiner (2002), which is denoted as “BCFE”. The number of replications is 2,000 for all cases.

The results are provided in Tables S.1-S.4. Since a detailed discussion for the FE and IV/GMM estimators is provided in the main body in the context of more general model with weakly exogenous regressor, we focus on the BCFE estimator here. Compared with the FE estimator, the bias of the BCFE estimator is much smaller. However, when compared with the HPJ estimator, the HPJ is more effective in reducing the bias of the FE estimator. In terms of MAE, the BCFE estimator tends to perform better than the HPJ estimator except when  $\alpha = 0.8$  and  $T = 10$ . However, in terms of inference, both the BCFE estimator has large size distortions when  $T$  is not large.

### S.5.2 Models with weakly exogenous regressor and time trend

Tables S.5-S.12 provide simulation results for models with weakly exogenous regressors and time trends for the case of  $\sigma_\eta^2 = 5$ . For the details, see the main body.

## References

- Amemiya, T. (1985) *Advanced Econometrics*: Harvard university press.
- Arellano, M. (2003) *Panel Data Econometrics*, Oxford: Oxford University Press.
- Chen, Y. (2013) “A New Algorithm for Computing the Determinant and the Inverse of a Pentadiagonal Toeplitz Matrix,” *Engineering*, 5, p. 25.
- Dow, M. (2003) “Explicit inverses of Toeplitz and associated matrices,” *ANZIAM Journal*, 44, E185–E215.
- El-Mikkawy, M. and A. Karawia (2006) “Inversion of General Tridiagonal Matrices,” *Applied Mathematics Letters*, 19, 712–720.
- Hamilton, J. D. (1994) *Time Series Analysis*: Princeton University Press.

Table S.1: AR(1) model, Bias, IQR, MAE and Size ( $\alpha = 0.4, \sigma_\eta^2 = 1$ )

| $N/T$  | Bias   |       |       |       | IQR   |      |      |      | MAE   |      |      |      | Size  |       |      |      |
|--------|--------|-------|-------|-------|-------|------|------|------|-------|------|------|------|-------|-------|------|------|
|        | 10     | 20    | 50    | 100   | 10    | 20   | 50   | 100  | 10    | 20   | 50   | 100  | 10    | 20    | 50   | 100  |
| FE     |        |       |       |       |       |      |      |      |       |      |      |      |       |       |      |      |
| 50     | -14.91 | -7.51 | -2.75 | -1.45 | 5.91  | 3.94 | 2.48 | 1.79 | 14.91 | 7.51 | 2.75 | 1.48 | 91.2  | 68.7  | 32.3 | 20.3 |
| 100    | -14.69 | -7.15 | -2.82 | -1.40 | 4.29  | 2.91 | 1.78 | 1.27 | 14.69 | 7.15 | 2.82 | 1.40 | 99.7  | 92.8  | 57.2 | 34.0 |
| 200    | -14.77 | -7.15 | -2.81 | -1.40 | 2.90  | 1.90 | 1.17 | 0.87 | 14.77 | 7.15 | 2.81 | 1.40 | 100.0 | 99.8  | 86.7 | 56.8 |
| 500    | -14.76 | -7.19 | -2.79 | -1.40 | 1.89  | 1.32 | 0.77 | 0.60 | 14.76 | 7.19 | 2.79 | 1.40 | 100.0 | 100.0 | 99.8 | 90.7 |
| IV-L   |        |       |       |       |       |      |      |      |       |      |      |      |       |       |      |      |
| 50     | 0.95   | 0.02  | 0.06  | 0.11  | 13.95 | 8.47 | 4.81 | 3.27 | 6.87  | 4.21 | 2.40 | 1.64 | 3.9   | 5.6   | 6.9  | 5.8  |
| 100    | 0.84   | 0.10  | 0.01  | 0.07  | 9.56  | 6.22 | 3.60 | 2.42 | 4.88  | 3.16 | 1.80 | 1.22 | 4.6   | 4.7   | 7.4  | 6.6  |
| 200    | 0.29   | 0.21  | 0.09  | -0.08 | 7.43  | 4.26 | 2.47 | 1.69 | 3.71  | 2.13 | 1.23 | 0.84 | 4.6   | 5.2   | 5.3  | 5.6  |
| 500    | 0.09   | 0.03  | -0.01 | 0.02  | 4.49  | 2.93 | 1.61 | 1.05 | 2.23  | 1.46 | 0.80 | 0.53 | 4.9   | 5.5   | 5.6  | 4.9  |
| GMM-L1 |        |       |       |       |       |      |      |      |       |      |      |      |       |       |      |      |
| 50     | -1.02  | -0.69 | -0.23 | -0.04 | 13.38 | 8.37 | 4.99 | 3.32 | 6.45  | 4.22 | 2.40 | 1.69 | 4.0   | 5.7   | 7.9  | 5.5  |
| 100    | -0.39  | -0.45 | -0.15 | -0.01 | 8.97  | 6.07 | 3.59 | 2.38 | 4.43  | 3.03 | 1.75 | 1.20 | 4.8   | 4.1   | 7.1  | 6.1  |
| 200    | -0.29  | -0.17 | 0.01  | -0.10 | 7.04  | 4.13 | 2.44 | 1.67 | 3.46  | 2.09 | 1.20 | 0.83 | 4.8   | 5.7   | 5.0  | 5.8  |
| 500    | -0.02  | -0.04 | -0.07 | 0.01  | 4.38  | 2.81 | 1.56 | 1.04 | 2.22  | 1.42 | 0.78 | 0.52 | 4.5   | 5.2   | 5.5  | 4.8  |
| GMM-L3 |        |       |       |       |       |      |      |      |       |      |      |      |       |       |      |      |
| 50     | -1.93  | -1.17 | -0.29 | -0.13 | 9.75  | 6.28 | 3.55 | 2.46 | 5.04  | 3.15 | 1.80 | 1.22 | 6.9   | 4.5   | 5.4  | 6.0  |
| 100    | -1.03  | -0.52 | -0.23 | -0.04 | 7.22  | 4.47 | 2.53 | 1.75 | 3.54  | 2.22 | 1.31 | 0.87 | 4.8   | 3.9   | 6.0  | 6.0  |
| 200    | -0.47  | -0.24 | -0.06 | -0.05 | 5.49  | 3.08 | 1.69 | 1.19 | 2.77  | 1.54 | 0.86 | 0.59 | 5.4   | 5.7   | 4.7  | 4.5  |
| 500    | -0.25  | -0.05 | -0.03 | -0.03 | 3.34  | 1.96 | 1.15 | 0.80 | 1.66  | 0.99 | 0.58 | 0.40 | 3.9   | 4.0   | 4.4  | 4.1  |
| IV-B   |        |       |       |       |       |      |      |      |       |      |      |      |       |       |      |      |
| 50     | 0.07   | -0.04 | 0.02  | -0.04 | 10.35 | 5.92 | 3.06 | 1.96 | 5.19  | 2.90 | 1.51 | 0.98 | 5.7   | 4.5   | 6.8  | 6.6  |
| 100    | 0.13   | -0.05 | 0.00  | 0.03  | 7.93  | 4.17 | 2.01 | 1.43 | 3.94  | 2.09 | 1.01 | 0.69 | 4.5   | 3.7   | 6.4  | 6.0  |
| 200    | -0.26  | -0.06 | -0.04 | -0.03 | 5.66  | 2.75 | 1.43 | 0.95 | 2.74  | 1.38 | 0.72 | 0.47 | 5.1   | 4.8   | 5.3  | 5.9  |
| 500    | -0.09  | 0.04  | 0.03  | 0.02  | 3.48  | 1.80 | 0.95 | 0.64 | 1.74  | 0.89 | 0.48 | 0.33 | 4.4   | 4.6   | 4.6  | 5.2  |
| GMM-B1 |        |       |       |       |       |      |      |      |       |      |      |      |       |       |      |      |
| 50     | -0.38  | -0.27 | -0.02 | -0.10 | 10.69 | 5.75 | 3.07 | 1.98 | 5.28  | 2.94 | 1.54 | 0.99 | 6.3   | 5.0   | 6.2  | 7.2  |
| 100    | -0.34  | -0.22 | -0.07 | -0.02 | 7.73  | 4.18 | 1.96 | 1.36 | 3.85  | 2.07 | 0.98 | 0.69 | 4.8   | 3.5   | 5.8  | 6.2  |
| 200    | -0.33  | -0.13 | -0.07 | -0.03 | 5.49  | 2.65 | 1.41 | 0.93 | 2.79  | 1.37 | 0.70 | 0.47 | 5.5   | 4.7   | 5.9  | 5.5  |
| 500    | -0.15  | 0.04  | 0.03  | 0.01  | 3.57  | 1.72 | 0.92 | 0.64 | 1.81  | 0.86 | 0.46 | 0.32 | 4.8   | 4.5   | 5.3  | 5.6  |
| GMM-B3 |        |       |       |       |       |      |      |      |       |      |      |      |       |       |      |      |
| 50     | -2.15  | -0.86 | -0.20 | -0.15 | 10.37 | 5.61 | 3.05 | 1.99 | 5.25  | 2.95 | 1.54 | 0.99 | 7.0   | 5.7   | 6.1  | 6.7  |
| 100    | -1.15  | -0.45 | -0.16 | -0.06 | 7.59  | 4.18 | 2.01 | 1.34 | 3.86  | 2.16 | 0.99 | 0.69 | 4.8   | 4.3   | 6.0  | 6.0  |
| 200    | -0.77  | -0.25 | -0.11 | -0.04 | 5.33  | 2.68 | 1.42 | 0.92 | 2.81  | 1.38 | 0.71 | 0.47 | 5.7   | 4.6   | 5.6  | 5.5  |
| 500    | -0.32  | -0.04 | 0.02  | 0.01  | 3.49  | 1.75 | 0.91 | 0.65 | 1.78  | 0.88 | 0.47 | 0.32 | 4.7   | 4.5   | 4.8  | 5.8  |
| HPJ    |        |       |       |       |       |      |      |      |       |      |      |      |       |       |      |      |
| 50     | 0.37   | 0.19  | 0.19  | 0.01  | 8.46  | 4.75 | 2.71 | 1.83 | 4.25  | 2.37 | 1.36 | 0.91 | 8.9   | 6.6   | 5.2  | 6.3  |
| 100    | 0.67   | 0.51  | 0.11  | 0.02  | 5.69  | 3.40 | 1.92 | 1.30 | 2.93  | 1.75 | 0.97 | 0.66 | 8.9   | 6.3   | 5.9  | 5.7  |
| 200    | 0.86   | 0.41  | 0.13  | 0.03  | 4.17  | 2.32 | 1.27 | 0.92 | 2.10  | 1.24 | 0.63 | 0.46 | 8.4   | 6.6   | 5.5  | 5.5  |
| 500    | 0.67   | 0.38  | 0.13  | 0.04  | 2.75  | 1.56 | 0.84 | 0.59 | 1.45  | 0.79 | 0.43 | 0.30 | 7.6   | 8.7   | 4.9  | 6.2  |
| BOD    |        |       |       |       |       |      |      |      |       |      |      |      |       |       |      |      |
| 50     | 2.51   | 1.97  | 1.59  | 0.94  | 7.16  | 4.53 | 2.69 | 1.85 | 3.96  | 2.56 | 1.79 | 1.16 | 8.1   | 11.7  | 14.5 | 13.2 |
| 100    | 2.71   | 2.37  | 1.56  | 1.02  | 5.01  | 3.15 | 1.86 | 1.29 | 3.28  | 2.46 | 1.60 | 1.05 | 11.2  | 16.4  | 21.3 | 19.3 |
| 200    | 2.71   | 2.42  | 1.56  | 1.04  | 3.60  | 2.06 | 1.22 | 0.90 | 2.88  | 2.42 | 1.56 | 1.04 | 18.6  | 28.9  | 34.1 | 31.8 |
| 500    | 2.88   | 2.43  | 1.60  | 1.06  | 2.29  | 1.50 | 0.82 | 0.62 | 2.88  | 2.43 | 1.60 | 1.06 | 38.6  | 61.7  | 74.1 | 69.3 |
| BCBOD  |        |       |       |       |       |      |      |      |       |      |      |      |       |       |      |      |
| 50     | 0.02   | -0.43 | 0.05  | -0.12 | 11.72 | 7.49 | 4.68 | 3.20 | 5.86  | 3.74 | 2.34 | 1.59 | 21.8  | 23.2  | 26.5 | 28.1 |
| 100    | -0.03  | 0.12  | 0.06  | -0.05 | 7.46  | 5.15 | 3.17 | 2.37 | 3.73  | 2.52 | 1.57 | 1.18 | 19.4  | 20.6  | 25.3 | 25.5 |
| 200    | 0.14   | 0.18  | 0.15  | 0.01  | 5.88  | 3.60 | 2.39 | 1.63 | 2.90  | 1.81 | 1.19 | 0.82 | 21.0  | 22.6  | 25.6 | 25.8 |
| 500    | 0.14   | 0.11  | 0.10  | 0.08  | 3.56  | 2.39 | 1.50 | 1.08 | 1.83  | 1.20 | 0.77 | 0.54 | 21.2  | 23.1  | 24.8 | 26.0 |
| BCFE   |        |       |       |       |       |      |      |      |       |      |      |      |       |       |      |      |
| 50     | -2.40  | -0.89 | 0.00  | -0.07 | 6.50  | 4.13 | 2.53 | 1.81 | 3.54  | 2.16 | 1.28 | 0.90 | 10.9  | 6.0   | 7.2  | 7.1  |
| 100    | -2.16  | -0.51 | -0.07 | -0.01 | 4.72  | 3.05 | 1.82 | 1.28 | 2.67  | 1.55 | 0.92 | 0.64 | 14.3  | 5.7   | 6.3  | 6.0  |
| 200    | -2.24  | -0.50 | -0.07 | -0.02 | 3.19  | 1.99 | 1.20 | 0.88 | 2.33  | 1.00 | 0.61 | 0.44 | 19.2  | 7.4   | 6.0  | 5.5  |
| 500    | -2.23  | -0.55 | -0.04 | -0.01 | 2.08  | 1.38 | 0.79 | 0.61 | 2.23  | 0.82 | 0.39 | 0.31 | 36.2  | 9.0   | 4.9  | 5.6  |

Table S.2: AR(1) model, Bias, IQR, MAE and Size ( $\alpha = 0.4$ ,  $\sigma_\eta^2 = 5$ )

| N/T    | Bias   |       |       |       | IQR   |       |      |      | MAE   |      |      |      | Size  |       |      |      |
|--------|--------|-------|-------|-------|-------|-------|------|------|-------|------|------|------|-------|-------|------|------|
|        | 10     | 20    | 50    | 100   | 10    | 20    | 50   | 100  | 10    | 20   | 50   | 100  | 10    | 20    | 50   | 100  |
| FE     |        |       |       |       |       |       |      |      |       |      |      |      |       |       |      |      |
| 50     | -14.91 | -7.51 | -2.75 | -1.45 | 5.91  | 3.94  | 2.48 | 1.79 | 14.91 | 7.51 | 2.75 | 1.48 | 91.2  | 68.7  | 32.3 | 20.3 |
| 100    | -14.69 | -7.15 | -2.82 | -1.40 | 4.29  | 2.91  | 1.78 | 1.27 | 14.69 | 7.15 | 2.82 | 1.40 | 99.7  | 92.8  | 57.2 | 34.0 |
| 200    | -14.77 | -7.15 | -2.81 | -1.40 | 2.90  | 1.90  | 1.17 | 0.87 | 14.77 | 7.15 | 2.81 | 1.40 | 100.0 | 99.8  | 86.7 | 56.8 |
| 500    | -14.76 | -7.19 | -2.79 | -1.40 | 1.89  | 1.32  | 0.77 | 0.60 | 14.76 | 7.19 | 2.79 | 1.40 | 100.0 | 100.0 | 99.8 | 90.7 |
| IV-L   |        |       |       |       |       |       |      |      |       |      |      |      |       |       |      |      |
| 50     | 2.06   | 0.42  | -0.02 | 0.06  | 28.45 | 17.41 | 9.55 | 6.44 | 14.32 | 8.54 | 4.73 | 3.21 | 4.5   | 5.0   | 5.7  | 5.3  |
| 100    | 1.40   | 0.18  | -0.12 | 0.16  | 19.31 | 12.68 | 7.18 | 4.58 | 9.68  | 6.26 | 3.56 | 2.32 | 4.8   | 4.3   | 5.7  | 6.5  |
| 200    | 0.66   | 0.23  | 0.06  | -0.12 | 14.18 | 8.51  | 4.89 | 3.28 | 7.04  | 4.27 | 2.45 | 1.65 | 5.3   | 5.7   | 5.7  | 5.8  |
| 500    | 0.15   | 0.08  | -0.02 | 0.05  | 8.85  | 5.59  | 3.08 | 2.00 | 4.40  | 2.77 | 1.53 | 1.00 | 4.8   | 5.2   | 6.0  | 5.3  |
| GMM-L1 |        |       |       |       |       |       |      |      |       |      |      |      |       |       |      |      |
| 50     | -4.79  | -2.36 | -1.08 | -0.37 | 24.28 | 15.26 | 9.04 | 6.09 | 12.17 | 7.38 | 4.43 | 2.89 | 3.1   | 4.8   | 6.2  | 6.3  |
| 100    | -2.87  | -1.60 | -0.75 | -0.12 | 17.19 | 11.08 | 7.06 | 4.37 | 8.89  | 5.78 | 3.46 | 2.15 | 4.1   | 4.6   | 6.3  | 6.3  |
| 200    | -1.51  | -0.72 | -0.31 | -0.23 | 13.39 | 8.02  | 4.79 | 3.15 | 6.81  | 3.94 | 2.36 | 1.58 | 4.9   | 5.0   | 6.1  | 5.8  |
| 500    | -0.53  | -0.30 | -0.24 | -0.06 | 8.37  | 5.39  | 3.08 | 1.98 | 4.13  | 2.63 | 1.52 | 1.00 | 4.7   | 5.3   | 5.9  | 5.3  |
| GMM-L3 |        |       |       |       |       |       |      |      |       |      |      |      |       |       |      |      |
| 50     | -2.37  | -1.44 | -0.24 | -0.18 | 10.91 | 6.74  | 3.85 | 2.61 | 5.53  | 3.41 | 1.91 | 1.29 | 7.1   | 3.9   | 5.3  | 5.4  |
| 100    | -1.21  | -0.69 | -0.27 | -0.12 | 8.25  | 4.81  | 2.71 | 1.87 | 4.10  | 2.47 | 1.38 | 0.94 | 5.2   | 4.4   | 5.4  | 5.5  |
| 200    | -0.65  | -0.32 | -0.09 | -0.09 | 5.96  | 3.35  | 1.84 | 1.26 | 2.89  | 1.73 | 0.93 | 0.63 | 5.4   | 5.6   | 4.2  | 5.6  |
| 500    | -0.44  | -0.03 | -0.03 | -0.05 | 3.72  | 2.09  | 1.16 | 0.82 | 1.89  | 1.03 | 0.59 | 0.41 | 4.4   | 4.3   | 4.7  | 5.0  |
| IV-B   |        |       |       |       |       |       |      |      |       |      |      |      |       |       |      |      |
| 50     | 0.07   | -0.04 | 0.02  | -0.04 | 10.35 | 5.92  | 3.06 | 1.96 | 5.19  | 2.90 | 1.51 | 0.98 | 5.7   | 4.5   | 6.8  | 6.6  |
| 100    | 0.13   | -0.05 | 0.00  | 0.03  | 7.93  | 4.17  | 2.01 | 1.43 | 3.94  | 2.09 | 1.01 | 0.69 | 4.5   | 3.7   | 6.4  | 6.0  |
| 200    | -0.26  | -0.06 | -0.04 | -0.03 | 5.66  | 2.75  | 1.43 | 0.95 | 2.74  | 1.38 | 0.72 | 0.47 | 5.1   | 4.8   | 5.3  | 5.9  |
| 500    | -0.09  | 0.04  | 0.03  | 0.02  | 3.48  | 1.80  | 0.95 | 0.64 | 1.74  | 0.89 | 0.48 | 0.33 | 4.4   | 4.6   | 4.6  | 5.2  |
| GMM-B1 |        |       |       |       |       |       |      |      |       |      |      |      |       |       |      |      |
| 50     | -0.38  | -0.27 | -0.02 | -0.10 | 10.69 | 5.75  | 3.07 | 1.98 | 5.28  | 2.94 | 1.54 | 0.99 | 6.3   | 5.0   | 6.2  | 7.2  |
| 100    | -0.34  | -0.22 | -0.07 | -0.02 | 7.73  | 4.18  | 1.96 | 1.36 | 3.85  | 2.07 | 0.98 | 0.69 | 4.8   | 3.5   | 5.8  | 6.2  |
| 200    | -0.33  | -0.13 | -0.07 | -0.03 | 5.49  | 2.65  | 1.41 | 0.93 | 2.79  | 1.37 | 0.70 | 0.47 | 5.5   | 4.7   | 5.9  | 5.5  |
| 500    | -0.15  | 0.04  | 0.03  | 0.01  | 3.57  | 1.72  | 0.92 | 0.64 | 1.81  | 0.86 | 0.46 | 0.32 | 4.8   | 4.5   | 5.3  | 5.6  |
| GMM-B3 |        |       |       |       |       |       |      |      |       |      |      |      |       |       |      |      |
| 50     | -2.15  | -0.86 | -0.20 | -0.15 | 10.37 | 5.61  | 3.05 | 1.99 | 5.25  | 2.95 | 1.54 | 0.99 | 7.0   | 5.7   | 6.1  | 6.7  |
| 100    | -1.15  | -0.45 | -0.16 | -0.06 | 7.59  | 4.18  | 2.01 | 1.34 | 3.86  | 2.16 | 0.99 | 0.69 | 4.8   | 4.3   | 6.0  | 6.0  |
| 200    | -0.77  | -0.25 | -0.11 | -0.04 | 5.33  | 2.68  | 1.42 | 0.92 | 2.81  | 1.38 | 0.71 | 0.47 | 5.7   | 4.6   | 5.6  | 5.5  |
| 500    | -0.32  | -0.04 | 0.02  | 0.01  | 3.49  | 1.75  | 0.91 | 0.65 | 1.78  | 0.88 | 0.47 | 0.32 | 4.7   | 4.5   | 4.8  | 5.8  |
| HPJ    |        |       |       |       |       |       |      |      |       |      |      |      |       |       |      |      |
| 50     | 0.37   | 0.19  | 0.19  | 0.01  | 8.46  | 4.75  | 2.71 | 1.83 | 4.25  | 2.37 | 1.36 | 0.91 | 8.9   | 6.6   | 5.2  | 6.3  |
| 100    | 0.67   | 0.51  | 0.11  | 0.02  | 5.69  | 3.40  | 1.92 | 1.30 | 2.93  | 1.75 | 0.97 | 0.66 | 8.9   | 6.3   | 5.9  | 5.7  |
| 200    | 0.86   | 0.41  | 0.13  | 0.03  | 4.17  | 2.32  | 1.27 | 0.92 | 2.10  | 1.24 | 0.63 | 0.46 | 8.4   | 6.6   | 5.5  | 5.5  |
| 500    | 0.67   | 0.38  | 0.13  | 0.04  | 2.75  | 1.56  | 0.84 | 0.59 | 1.45  | 0.79 | 0.43 | 0.30 | 7.6   | 8.7   | 4.9  | 6.2  |
| BOD    |        |       |       |       |       |       |      |      |       |      |      |      |       |       |      |      |
| 50     | 2.87   | 2.31  | 1.65  | 1.00  | 6.86  | 4.48  | 2.67 | 1.84 | 4.12  | 2.73 | 1.82 | 1.17 | 10.5  | 13.7  | 14.8 | 13.6 |
| 100    | 3.05   | 2.61  | 1.65  | 1.06  | 5.02  | 3.17  | 1.87 | 1.30 | 3.50  | 2.64 | 1.67 | 1.09 | 13.3  | 20.1  | 23.2 | 20.4 |
| 200    | 3.10   | 2.63  | 1.64  | 1.07  | 3.57  | 2.09  | 1.22 | 0.90 | 3.19  | 2.63 | 1.64 | 1.07 | 22.2  | 34.1  | 36.7 | 33.4 |
| 500    | 3.28   | 2.65  | 1.68  | 1.09  | 2.25  | 1.46  | 0.80 | 0.62 | 3.28  | 2.65 | 1.68 | 1.09 | 48.4  | 68.5  | 77.7 | 71.6 |
| BCBOD  |        |       |       |       |       |       |      |      |       |      |      |      |       |       |      |      |
| 50     | -0.20  | -0.60 | 0.10  | -0.18 | 20.54 | 13.96 | 8.81 | 6.17 | 10.17 | 7.01 | 4.41 | 3.10 | 47.8  | 50.2  | 52.9 | 55.2 |
| 100    | -0.32  | 0.01  | 0.22  | 0.00  | 14.29 | 9.29  | 6.05 | 4.54 | 7.09  | 4.68 | 3.03 | 2.29 | 46.4  | 48.1  | 53.5 | 55.0 |
| 200    | 0.11   | 0.24  | 0.27  | 0.03  | 10.96 | 6.88  | 4.55 | 3.09 | 5.44  | 3.43 | 2.30 | 1.52 | 49.7  | 51.0  | 55.4 | 54.6 |
| 500    | 0.09   | 0.05  | 0.12  | 0.05  | 6.67  | 4.43  | 2.86 | 2.00 | 3.34  | 2.21 | 1.46 | 1.00 | 48.3  | 51.1  | 55.5 | 56.3 |
| BCFE   |        |       |       |       |       |       |      |      |       |      |      |      |       |       |      |      |
| 50     | -2.40  | -0.89 | 0.00  | -0.07 | 6.50  | 4.13  | 2.53 | 1.81 | 3.54  | 2.16 | 1.28 | 0.90 | 10.9  | 6.0   | 7.2  | 7.1  |
| 100    | -2.16  | -0.51 | -0.07 | -0.01 | 4.72  | 3.05  | 1.82 | 1.28 | 2.67  | 1.55 | 0.92 | 0.64 | 14.3  | 5.7   | 6.3  | 6.0  |
| 200    | -2.24  | -0.50 | -0.07 | -0.02 | 3.19  | 1.99  | 1.20 | 0.88 | 2.33  | 1.00 | 0.61 | 0.44 | 19.2  | 7.4   | 6.0  | 5.5  |
| 500    | -2.23  | -0.55 | -0.04 | -0.01 | 2.08  | 1.38  | 0.79 | 0.61 | 2.23  | 0.82 | 0.39 | 0.31 | 36.2  | 9.0   | 4.9  | 5.6  |

Table S.3: AR(1) model, Bias, IQR, MAE and Size ( $\alpha = 0.8, \sigma_\eta^2 = 1$ )

| $N/T$  | Bias   |        |       |       | IQR   |       |      |      | MAE   |       |      |      | Size  |       |       |       |
|--------|--------|--------|-------|-------|-------|-------|------|------|-------|-------|------|------|-------|-------|-------|-------|
|        | 10     | 20     | 50    | 100   | 10    | 20    | 50   | 100  | 10    | 20    | 50   | 100  | 10    | 20    | 50    | 100   |
| FE     |        |        |       |       |       |       |      |      |       |       |      |      |       |       |       |       |
| 50     | -22.08 | -10.56 | -3.86 | -1.91 | 5.47  | 3.38  | 1.91 | 1.22 | 22.08 | 10.56 | 3.86 | 1.91 | 100.0 | 99.0  | 83.1  | 57.0  |
| 100    | -22.02 | -10.33 | -3.80 | -1.86 | 3.96  | 2.41  | 1.35 | 0.88 | 22.02 | 10.33 | 3.80 | 1.86 | 100.0 | 100.0 | 98.1  | 82.6  |
| 200    | -21.77 | -10.40 | -3.86 | -1.85 | 2.80  | 1.61  | 0.85 | 0.61 | 21.77 | 10.40 | 3.86 | 1.85 | 100.0 | 100.0 | 100.0 | 98.5  |
| 500    | -21.81 | -10.46 | -3.84 | -1.86 | 1.73  | 1.13  | 0.54 | 0.40 | 21.81 | 10.46 | 3.84 | 1.86 | 100.0 | 100.0 | 100.0 | 100.0 |
| IV-L   |        |        |       |       |       |       |      |      |       |       |      |      |       |       |       |       |
| 50     | 1.48   | 0.25   | -0.19 | 0.04  | 30.81 | 15.54 | 7.00 | 4.15 | 15.68 | 7.51  | 3.33 | 2.10 | 1.3   | 4.1   | 5.2   | 6.6   |
| 100    | 1.58   | 0.25   | -0.12 | 0.14  | 20.27 | 11.23 | 5.18 | 2.95 | 10.59 | 5.60  | 2.59 | 1.49 | 2.3   | 3.6   | 5.1   | 6.9   |
| 200    | 0.62   | 0.16   | 0.11  | -0.04 | 15.10 | 7.31  | 3.57 | 2.13 | 7.57  | 3.68  | 1.78 | 1.06 | 3.9   | 5.7   | 5.6   | 5.9   |
| 500    | 0.33   | 0.00   | 0.02  | 0.03  | 9.52  | 4.88  | 2.16 | 1.34 | 4.77  | 2.44  | 1.07 | 0.67 | 4.5   | 5.0   | 6.3   | 5.3   |
| GMM-L1 |        |        |       |       |       |       |      |      |       |       |      |      |       |       |       |       |
| 50     | -9.60  | -4.47  | -1.52 | -0.50 | 28.63 | 13.03 | 6.69 | 4.03 | 13.47 | 6.88  | 3.26 | 1.98 | 2.5   | 3.1   | 4.3   | 5.3   |
| 100    | -5.42  | -2.65  | -0.84 | -0.24 | 18.22 | 9.82  | 5.12 | 2.90 | 9.58  | 5.12  | 2.52 | 1.44 | 2.4   | 3.0   | 5.0   | 6.9   |
| 200    | -2.72  | -1.27  | -0.35 | -0.22 | 13.26 | 6.89  | 3.47 | 2.15 | 7.15  | 3.36  | 1.70 | 1.05 | 3.3   | 3.8   | 5.7   | 5.8   |
| 500    | -1.07  | -0.50  | -0.18 | -0.05 | 8.86  | 4.47  | 2.21 | 1.33 | 4.32  | 2.31  | 1.08 | 0.66 | 4.1   | 4.3   | 5.5   | 5.8   |
| GMM-L3 |        |        |       |       |       |       |      |      |       |       |      |      |       |       |       |       |
| 50     | -9.92  | -4.17  | -1.14 | -0.45 | 15.54 | 8.07  | 3.80 | 2.38 | 10.69 | 4.92  | 2.05 | 1.27 | 13.0  | 8.3   | 7.3   | 7.0   |
| 100    | -6.21  | -2.20  | -0.63 | -0.18 | 12.29 | 5.81  | 2.75 | 1.81 | 7.53  | 3.39  | 1.41 | 0.95 | 10.1  | 6.3   | 6.1   | 6.4   |
| 200    | -3.52  | -1.21  | -0.33 | -0.19 | 9.57  | 4.46  | 1.98 | 1.21 | 5.47  | 2.35  | 1.01 | 0.64 | 7.9   | 5.7   | 5.7   | 6.1   |
| 500    | -1.48  | -0.42  | -0.11 | -0.04 | 5.86  | 2.82  | 1.36 | 0.85 | 3.25  | 1.39  | 0.67 | 0.44 | 5.4   | 6.2   | 4.8   | 5.0   |
| IV-B   |        |        |       |       |       |       |      |      |       |       |      |      |       |       |       |       |
| 50     | -0.19  | -0.09  | 0.07  | -0.04 | 21.04 | 8.30  | 3.04 | 1.69 | 10.48 | 4.15  | 1.50 | 0.83 | 3.9   | 4.1   | 5.9   | 5.8   |
| 100    | -0.17  | 0.06   | 0.03  | -0.02 | 15.93 | 5.59  | 2.11 | 1.17 | 8.04  | 2.83  | 1.07 | 0.58 | 4.0   | 4.3   | 5.9   | 5.0   |
| 200    | -0.51  | -0.08  | 0.00  | -0.02 | 11.31 | 3.83  | 1.47 | 0.78 | 5.59  | 1.90  | 0.74 | 0.38 | 5.1   | 5.1   | 5.0   | 5.3   |
| 500    | -0.07  | 0.04   | 0.03  | 0.01  | 7.34  | 2.57  | 0.92 | 0.54 | 3.71  | 1.31  | 0.46 | 0.27 | 4.4   | 5.3   | 4.6   | 4.8   |
| GMM-B1 |        |        |       |       |       |       |      |      |       |       |      |      |       |       |       |       |
| 50     | -5.18  | -1.40  | -0.13 | -0.14 | 19.05 | 7.54  | 2.86 | 1.70 | 10.18 | 3.86  | 1.40 | 0.84 | 6.0   | 5.3   | 6.4   | 6.3   |
| 100    | -2.77  | -0.77  | -0.13 | -0.05 | 14.22 | 5.33  | 2.04 | 1.15 | 7.25  | 2.70  | 1.01 | 0.57 | 4.9   | 3.7   | 5.9   | 5.3   |
| 200    | -1.53  | -0.38  | -0.05 | -0.04 | 10.63 | 3.64  | 1.40 | 0.75 | 5.34  | 1.86  | 0.70 | 0.38 | 6.4   | 4.2   | 4.9   | 5.4   |
| 500    | -0.53  | -0.08  | 0.03  | 0.00  | 6.77  | 2.42  | 0.89 | 0.51 | 3.36  | 1.21  | 0.45 | 0.26 | 5.3   | 4.3   | 5.0   | 4.7   |
| GMM-B3 |        |        |       |       |       |       |      |      |       |       |      |      |       |       |       |       |
| 50     | -11.11 | -2.96  | -0.52 | -0.25 | 17.81 | 7.34  | 2.77 | 1.62 | 12.14 | 3.96  | 1.42 | 0.82 | 14.5  | 8.6   | 7.2   | 6.4   |
| 100    | -6.83  | -1.63  | -0.24 | -0.09 | 12.83 | 4.98  | 1.95 | 1.14 | 8.25  | 2.82  | 1.00 | 0.57 | 10.7  | 5.9   | 6.0   | 5.1   |
| 200    | -3.89  | -0.89  | -0.12 | -0.07 | 9.51  | 3.39  | 1.38 | 0.73 | 5.76  | 1.89  | 0.67 | 0.37 | 9.2   | 5.0   | 5.6   | 5.6   |
| 500    | -1.56  | -0.29  | -0.02 | -0.01 | 6.55  | 2.34  | 0.90 | 0.51 | 3.35  | 1.19  | 0.45 | 0.26 | 6.5   | 4.9   | 5.0   | 4.6   |
| HPJ    |        |        |       |       |       |       |      |      |       |       |      |      |       |       |       |       |
| 50     | -1.17  | 0.88   | 0.41  | 0.10  | 9.43  | 4.91  | 2.20 | 1.38 | 4.80  | 2.55  | 1.19 | 0.70 | 12.0  | 10.4  | 7.7   | 6.2   |
| 100    | -1.08  | 1.17   | 0.55  | 0.16  | 6.70  | 3.65  | 1.69 | 0.95 | 3.52  | 1.99  | 0.94 | 0.49 | 10.8  | 13.9  | 10.8  | 6.3   |
| 200    | -0.79  | 0.93   | 0.51  | 0.16  | 4.72  | 2.56  | 1.18 | 0.66 | 2.33  | 1.44  | 0.69 | 0.35 | 10.8  | 14.8  | 12.1  | 6.4   |
| 500    | -0.71  | 0.93   | 0.47  | 0.14  | 3.12  | 1.67  | 0.73 | 0.46 | 1.53  | 1.06  | 0.51 | 0.24 | 13.6  | 19.0  | 17.9  | 8.9   |
| BOD    |        |        |       |       |       |       |      |      |       |       |      |      |       |       |       |       |
| 50     | 1.95   | 2.18   | 1.92  | 1.34  | 5.91  | 3.17  | 1.84 | 1.25 | 3.28  | 2.46  | 1.95 | 1.34 | 10.8  | 17.0  | 31.7  | 33.0  |
| 100    | 2.17   | 2.51   | 1.96  | 1.39  | 4.25  | 2.30  | 1.38 | 0.89 | 2.65  | 2.51  | 1.96 | 1.39 | 12.6  | 33.2  | 53.3  | 60.0  |
| 200    | 2.44   | 2.55   | 1.97  | 1.43  | 3.06  | 1.63  | 0.85 | 0.60 | 2.53  | 2.55  | 1.97 | 1.43 | 20.1  | 55.2  | 83.7  | 88.3  |
| 500    | 2.50   | 2.54   | 1.98  | 1.42  | 1.82  | 1.07  | 0.54 | 0.41 | 2.50  | 2.54  | 1.98 | 1.42 | 43.8  | 88.8  | 99.4  | 99.8  |
| BCBOD  |        |        |       |       |       |       |      |      |       |       |      |      |       |       |       |       |
| 50     | 0.34   | 0.24   | 0.21  | 0.05  | 12.46 | 7.66  | 4.45 | 3.33 | 6.18  | 3.84  | 2.25 | 1.65 | 31.1  | 37.7  | 40.3  | 42.6  |
| 100    | 0.47   | 0.32   | 0.24  | 0.08  | 8.16  | 5.03  | 3.18 | 2.37 | 4.12  | 2.59  | 1.59 | 1.19 | 28.9  | 34.4  | 41.8  | 43.2  |
| 200    | 0.66   | 0.43   | 0.27  | 0.15  | 6.05  | 3.71  | 2.38 | 1.58 | 3.03  | 1.90  | 1.20 | 0.80 | 32.2  | 34.5  | 43.4  | 42.7  |
| 500    | 0.35   | 0.26   | 0.20  | 0.14  | 3.64  | 2.40  | 1.53 | 1.06 | 1.88  | 1.23  | 0.76 | 0.55 | 32.2  | 35.8  | 42.5  | 45.6  |
| BCFE   |        |        |       |       |       |       |      |      |       |       |      |      |       |       |       |       |
| 50     | -6.29  | -2.09  | -0.34 | -0.13 | 6.02  | 3.55  | 1.95 | 1.24 | 6.30  | 2.31  | 0.97 | 0.65 | 36.9  | 18.9  | 8.7   | 6.9   |
| 100    | -6.22  | -1.84  | -0.28 | -0.07 | 4.35  | 2.53  | 1.38 | 0.89 | 6.22  | 1.90  | 0.74 | 0.45 | 58.2  | 23.3  | 9.8   | 6.3   |
| 200    | -5.95  | -1.92  | -0.34 | -0.07 | 3.08  | 1.69  | 0.86 | 0.61 | 5.95  | 1.92  | 0.50 | 0.32 | 83.2  | 38.3  | 9.4   | 5.2   |
| 500    | -5.99  | -1.99  | -0.32 | -0.08 | 1.90  | 1.19  | 0.56 | 0.41 | 5.99  | 1.99  | 0.38 | 0.21 | 99.2  | 72.2  | 13.9  | 7.5   |

Table S.4: AR(1) model, Bias, IQR, MAE and Size ( $\alpha = 0.8, \sigma_\eta^2 = 5$ )

| $N/T$  | Bias   |        |       |       | IQR   |       |       |      | MAE   |       |      |      | Size  |       |       |       |
|--------|--------|--------|-------|-------|-------|-------|-------|------|-------|-------|------|------|-------|-------|-------|-------|
|        | 10     | 20     | 50    | 100   | 10    | 20    | 50    | 100  | 10    | 20    | 50   | 100  | 10    | 20    | 50    | 100   |
| FE     |        |        |       |       |       |       |       |      |       |       |      |      |       |       |       |       |
| 50     | -22.08 | -10.56 | -3.86 | -1.91 | 5.47  | 3.38  | 1.91  | 1.22 | 22.08 | 10.56 | 3.86 | 1.91 | 100.0 | 99.0  | 83.1  | 57.0  |
| 100    | -22.02 | -10.33 | -3.80 | -1.86 | 3.96  | 2.41  | 1.35  | 0.88 | 22.02 | 10.33 | 3.80 | 1.86 | 100.0 | 100.0 | 98.1  | 82.6  |
| 200    | -21.77 | -10.40 | -3.86 | -1.85 | 2.80  | 1.61  | 0.85  | 0.61 | 21.77 | 10.40 | 3.86 | 1.85 | 100.0 | 100.0 | 100.0 | 98.5  |
| 500    | -21.81 | -10.46 | -3.84 | -1.86 | 1.73  | 1.13  | 0.54  | 0.40 | 21.81 | 10.46 | 3.84 | 1.86 | 100.0 | 100.0 | 100.0 | 100.0 |
| IV-L   |        |        |       |       |       |       |       |      |       |       |      |      |       |       |       |       |
| 50     | 7.40   | 3.30   | 0.07  | 0.14  | 64.12 | 31.88 | 15.77 | 8.85 | 32.77 | 15.98 | 7.58 | 4.43 | 0.5   | 3.5   | 7.8   | 7.6   |
| 100    | 4.00   | 0.85   | -0.22 | 0.30  | 43.93 | 24.30 | 11.65 | 6.24 | 22.67 | 11.93 | 5.51 | 3.13 | 0.9   | 3.2   | 6.8   | 6.6   |
| 200    | 1.98   | 0.64   | 0.08  | -0.07 | 34.67 | 16.47 | 7.66  | 4.62 | 17.36 | 8.28  | 3.77 | 2.31 | 1.8   | 5.3   | 6.2   | 5.6   |
| 500    | 0.60   | 0.12   | -0.04 | 0.10  | 20.71 | 10.44 | 4.83  | 2.81 | 10.36 | 5.14  | 2.31 | 1.41 | 2.0   | 3.6   | 5.7   | 5.0   |
| GMM-L1 |        |        |       |       |       |       |       |      |       |       |      |      |       |       |       |       |
| 50     | -22.69 | -10.13 | -3.38 | -1.38 | 37.49 | 20.61 | 10.95 | 6.87 | 24.27 | 11.21 | 5.06 | 3.26 | 4.1   | 4.2   | 4.6   | 5.6   |
| 100    | -17.24 | -8.16  | -2.52 | -0.94 | 34.95 | 18.04 | 9.48  | 5.30 | 19.21 | 9.71  | 4.55 | 2.59 | 3.2   | 2.8   | 3.4   | 5.6   |
| 200    | -11.90 | -5.03  | -1.56 | -0.66 | 28.85 | 15.02 | 7.18  | 4.31 | 16.21 | 7.44  | 3.55 | 2.13 | 2.1   | 2.3   | 3.9   | 4.8   |
| 500    | -5.56  | -2.31  | -0.89 | -0.26 | 18.81 | 9.65  | 4.61  | 2.67 | 9.64  | 4.77  | 2.29 | 1.38 | 1.6   | 2.3   | 4.2   | 5.3   |
| GMM-L3 |        |        |       |       |       |       |       |      |       |       |      |      |       |       |       |       |
| 50     | -12.36 | -4.72  | -1.22 | -0.52 | 17.29 | 8.74  | 4.10  | 2.69 | 12.83 | 5.74  | 2.26 | 1.37 | 15.7  | 9.7   | 8.5   | 7.0   |
| 100    | -8.52  | -2.75  | -0.76 | -0.27 | 13.47 | 6.47  | 3.08  | 2.04 | 9.36  | 3.89  | 1.66 | 1.02 | 12.2  | 7.7   | 6.1   | 6.7   |
| 200    | -4.78  | -1.53  | -0.36 | -0.18 | 10.97 | 4.75  | 2.27  | 1.40 | 6.39  | 2.75  | 1.13 | 0.70 | 8.7   | 6.8   | 5.3   | 5.9   |
| 500    | -2.29  | -0.53  | -0.13 | -0.05 | 6.79  | 3.28  | 1.45  | 0.96 | 3.74  | 1.63  | 0.73 | 0.48 | 6.4   | 5.8   | 4.6   | 5.7   |
| IV-B   |        |        |       |       |       |       |       |      |       |       |      |      |       |       |       |       |
| 50     | -0.19  | -0.09  | 0.07  | -0.04 | 21.04 | 8.30  | 3.04  | 1.69 | 10.48 | 4.15  | 1.50 | 0.83 | 3.9   | 4.1   | 5.9   | 5.8   |
| 100    | -0.17  | 0.06   | 0.03  | -0.02 | 15.93 | 5.59  | 2.11  | 1.17 | 8.04  | 2.83  | 1.07 | 0.58 | 4.0   | 4.3   | 5.9   | 5.0   |
| 200    | -0.51  | -0.08  | 0.00  | -0.02 | 11.31 | 3.83  | 1.47  | 0.78 | 5.59  | 1.90  | 0.74 | 0.38 | 5.1   | 5.1   | 5.0   | 5.3   |
| 500    | -0.07  | 0.04   | 0.03  | 0.01  | 7.34  | 2.57  | 0.92  | 0.54 | 3.71  | 1.31  | 0.46 | 0.27 | 4.4   | 5.3   | 4.6   | 4.8   |
| GMM-B1 |        |        |       |       |       |       |       |      |       |       |      |      |       |       |       |       |
| 50     | -5.18  | -1.40  | -0.13 | -0.14 | 19.05 | 7.54  | 2.86  | 1.70 | 10.18 | 3.86  | 1.40 | 0.84 | 6.0   | 5.3   | 6.4   | 6.3   |
| 100    | -2.77  | -0.77  | -0.13 | -0.05 | 14.22 | 5.33  | 2.04  | 1.15 | 7.25  | 2.70  | 1.01 | 0.57 | 4.9   | 3.7   | 5.9   | 5.3   |
| 200    | -1.53  | -0.38  | -0.05 | -0.04 | 10.63 | 3.64  | 1.40  | 0.75 | 5.34  | 1.86  | 0.70 | 0.38 | 6.4   | 4.2   | 4.9   | 5.4   |
| 500    | -0.53  | -0.08  | 0.03  | 0.00  | 6.77  | 2.42  | 0.89  | 0.51 | 3.36  | 1.21  | 0.45 | 0.26 | 5.3   | 4.3   | 5.0   | 4.7   |
| GMM-B3 |        |        |       |       |       |       |       |      |       |       |      |      |       |       |       |       |
| 50     | -11.11 | -2.96  | -0.52 | -0.25 | 17.81 | 7.34  | 2.77  | 1.62 | 12.14 | 3.96  | 1.42 | 0.82 | 14.5  | 8.6   | 7.2   | 6.4   |
| 100    | -6.83  | -1.63  | -0.24 | -0.09 | 12.83 | 4.98  | 1.95  | 1.14 | 8.25  | 2.82  | 1.00 | 0.57 | 10.7  | 5.9   | 6.0   | 5.1   |
| 200    | -3.89  | -0.89  | -0.12 | -0.07 | 9.51  | 3.39  | 1.38  | 0.73 | 5.76  | 1.89  | 0.67 | 0.37 | 9.2   | 5.0   | 5.6   | 5.6   |
| 500    | -1.56  | -0.29  | -0.02 | -0.01 | 6.55  | 2.34  | 0.90  | 0.51 | 3.35  | 1.19  | 0.45 | 0.26 | 6.5   | 4.9   | 5.0   | 4.6   |
| HPJ    |        |        |       |       |       |       |       |      |       |       |      |      |       |       |       |       |
| 50     | -1.17  | 0.88   | 0.41  | 0.10  | 9.43  | 4.91  | 2.20  | 1.38 | 4.80  | 2.55  | 1.19 | 0.70 | 12.0  | 10.4  | 7.7   | 6.2   |
| 100    | -1.08  | 1.17   | 0.55  | 0.16  | 6.70  | 3.65  | 1.69  | 0.95 | 3.52  | 1.99  | 0.94 | 0.49 | 10.8  | 13.9  | 10.8  | 6.3   |
| 200    | -0.79  | 0.93   | 0.51  | 0.16  | 4.72  | 2.56  | 1.18  | 0.66 | 2.33  | 1.44  | 0.69 | 0.35 | 10.8  | 14.8  | 12.1  | 6.4   |
| 500    | -0.71  | 0.93   | 0.47  | 0.14  | 3.12  | 1.67  | 0.73  | 0.46 | 1.53  | 1.06  | 0.51 | 0.24 | 13.6  | 19.0  | 17.9  | 8.9   |
| BOD    |        |        |       |       |       |       |       |      |       |       |      |      |       |       |       |       |
| 50     | 2.13   | 2.37   | 1.99  | 1.36  | 5.93  | 3.15  | 1.86  | 1.22 | 3.28  | 2.51  | 2.01 | 1.37 | 11.5  | 18.8  | 33.7  | 34.5  |
| 100    | 2.33   | 2.63   | 2.03  | 1.41  | 4.27  | 2.33  | 1.39  | 0.89 | 2.80  | 2.64  | 2.03 | 1.41 | 13.9  | 36.5  | 56.3  | 62.0  |
| 200    | 2.56   | 2.70   | 2.03  | 1.45  | 3.06  | 1.60  | 0.86  | 0.60 | 2.65  | 2.70  | 2.03 | 1.45 | 22.7  | 59.2  | 85.5  | 89.8  |
| 500    | 2.66   | 2.68   | 2.04  | 1.45  | 1.80  | 1.05  | 0.55  | 0.40 | 2.66  | 2.68  | 2.04 | 1.45 | 48.7  | 92.1  | 99.5  | 99.8  |
| BCBOD  |        |        |       |       |       |       |       |      |       |       |      |      |       |       |       |       |
| 50     | 0.82   | -0.03  | 0.39  | -0.13 | 23.05 | 15.01 | 8.97  | 6.80 | 11.42 | 7.39  | 4.49 | 3.41 | 57.5  | 62.6  | 65.7  | 72.8  |
| 100    | 0.54   | 0.21   | 0.36  | -0.02 | 15.22 | 9.92  | 6.45  | 4.87 | 7.75  | 4.95  | 3.23 | 2.44 | 57.3  | 59.6  | 67.8  | 70.9  |
| 200    | 1.03   | 0.30   | 0.30  | 0.15  | 11.63 | 7.38  | 4.79  | 3.27 | 5.80  | 3.79  | 2.37 | 1.66 | 61.3  | 63.2  | 66.0  | 68.0  |
| 500    | 0.56   | 0.20   | 0.19  | 0.19  | 7.20  | 4.82  | 2.96  | 2.21 | 3.64  | 2.41  | 1.53 | 1.09 | 58.2  | 63.9  | 68.0  | 69.8  |
| BCFE   |        |        |       |       |       |       |       |      |       |       |      |      |       |       |       |       |
| 50     | -6.29  | -2.09  | -0.34 | -0.13 | 6.02  | 3.55  | 1.95  | 1.24 | 6.30  | 2.31  | 0.97 | 0.65 | 36.9  | 18.9  | 8.7   | 6.9   |
| 100    | -6.22  | -1.84  | -0.28 | -0.07 | 4.35  | 2.53  | 1.38  | 0.89 | 6.22  | 1.90  | 0.74 | 0.45 | 58.2  | 23.3  | 9.8   | 6.3   |
| 200    | -5.95  | -1.92  | -0.34 | -0.07 | 3.08  | 1.69  | 0.86  | 0.61 | 5.95  | 1.92  | 0.50 | 0.32 | 83.2  | 38.3  | 9.4   | 5.2   |
| 500    | -5.99  | -1.99  | -0.32 | -0.08 | 1.90  | 1.19  | 0.56  | 0.41 | 5.99  | 1.99  | 0.38 | 0.21 | 99.2  | 72.2  | 13.9  | 7.5   |

Table S.5: Fixed effects, Bias and IQR ( $\alpha = 0.4$ ,  $\beta = 1$ ,  $\sigma_{\eta}^2 = 5$ )

| N/T  | Bias      |       |       |       |         |       |       |       | IQR      |       |       |      |         |       |       |       |
|------|-----------|-------|-------|-------|---------|-------|-------|-------|----------|-------|-------|------|---------|-------|-------|-------|
|      | $\alpha$  |       |       |       | $\beta$ |       |       |       | $\alpha$ |       |       |      | $\beta$ |       |       |       |
|      | 10        | 20    | 50    | 100   | 10      | 20    | 50    | 100   | 10       | 20    | 50    | 100  | 10      | 20    | 50    | 100   |
|      | FE        |       |       |       |         |       |       |       |          |       |       |      |         |       |       |       |
| 50   | -11.43    | -5.54 | -2.21 | -1.05 | 3.67    | 2.77  | 1.18  | 0.67  | 5.44     | 3.35  | 2.03  | 1.47 | 14.16   | 9.67  | 5.95  | 4.01  |
| 100  | -11.59    | -5.60 | -2.20 | -1.10 | 3.23    | 2.54  | 1.08  | 0.73  | 3.92     | 2.52  | 1.56  | 1.13 | 10.42   | 6.58  | 4.22  | 2.97  |
| 200  | -11.61    | -5.51 | -2.17 | -1.06 | 3.46    | 2.47  | 1.15  | 0.60  | 2.61     | 1.78  | 1.14  | 0.77 | 7.06    | 4.57  | 2.85  | 1.98  |
| 500  | -11.50    | -5.52 | -2.15 | -1.07 | 3.71    | 2.63  | 1.24  | 0.61  | 1.72     | 1.13  | 0.74  | 0.51 | 4.76    | 2.88  | 1.79  | 1.29  |
| 1000 | -11.41    | -5.51 | -2.16 | -1.07 | 3.67    | 2.55  | 1.23  | 0.67  | 1.21     | 0.78  | 0.47  | 0.36 | 3.11    | 2.03  | 1.26  | 0.88  |
|      | IV-L      |       |       |       |         |       |       |       |          |       |       |      |         |       |       |       |
| 50   | 0.45      | 0.10  | 0.10  | 0.26  | 2.54    | 0.82  | -0.25 | 0.32  | 35.71    | 21.84 | 12.07 | 8.24 | 93.05   | 44.35 | 22.75 | 14.34 |
| 100  | 0.57      | -0.42 | -0.15 | -0.09 | 1.98    | -0.76 | -0.02 | -0.15 | 26.88    | 14.64 | 7.88  | 5.82 | 64.08   | 31.60 | 14.33 | 9.70  |
| 200  | -1.54     | -0.18 | 0.01  | -0.12 | -2.73   | -0.42 | -0.03 | -0.04 | 18.55    | 9.93  | 5.86  | 3.92 | 42.91   | 21.54 | 10.00 | 6.70  |
| 500  | -0.65     | 0.14  | 0.21  | 0.05  | 0.01    | 0.07  | 0.22  | -0.02 | 11.27    | 6.75  | 3.74  | 2.59 | 28.40   | 14.12 | 6.63  | 4.55  |
| 1000 | -0.18     | 0.17  | 0.11  | 0.04  | -0.42   | 0.28  | 0.23  | 0.12  | 8.09     | 4.52  | 2.76  | 1.91 | 20.30   | 9.54  | 4.83  | 3.29  |
|      | GMM-L1    |       |       |       |         |       |       |       |          |       |       |      |         |       |       |       |
| 50   | -5.17     | -1.64 | -0.77 | -0.42 | -9.82   | -2.14 | -1.57 | -0.31 | 16.46    | 11.24 | 6.38  | 4.84 | 44.85   | 22.96 | 12.98 | 8.93  |
| 100  | -3.90     | -2.04 | -0.74 | -0.36 | -8.20   | -3.66 | -1.07 | -0.78 | 15.62    | 9.81  | 5.73  | 4.37 | 37.99   | 20.35 | 10.53 | 7.48  |
| 200  | -3.02     | -1.18 | -0.42 | -0.30 | -6.34   | -2.66 | -1.00 | -0.47 | 12.26    | 7.65  | 4.39  | 3.24 | 29.27   | 15.24 | 7.89  | 5.54  |
| 500  | -1.77     | -0.58 | -0.09 | -0.11 | -3.98   | -1.14 | -0.45 | -0.21 | 8.85     | 5.25  | 3.18  | 2.40 | 21.54   | 11.18 | 5.87  | 4.05  |
| 1000 | -0.91     | -0.24 | -0.16 | -0.01 | -1.99   | -0.28 | -0.03 | -0.04 | 6.45     | 3.73  | 2.47  | 1.65 | 15.70   | 8.40  | 4.37  | 2.86  |
|      | GMM-L3    |       |       |       |         |       |       |       |          |       |       |      |         |       |       |       |
| 50   | -3.68     | -1.42 | -0.50 | -0.20 | -3.28   | -0.87 | -0.12 | 0.01  | 8.23     | 5.00  | 2.77  | 2.03 | 22.21   | 12.70 | 6.81  | 4.95  |
| 100  | -2.23     | -0.94 | -0.31 | -0.12 | -2.06   | -0.98 | -0.29 | -0.02 | 6.80     | 3.69  | 2.06  | 1.60 | 17.33   | 9.34  | 5.10  | 3.57  |
| 200  | -1.11     | -0.51 | -0.10 | -0.03 | -1.39   | -0.46 | -0.23 | -0.05 | 4.56     | 2.99  | 1.53  | 1.13 | 12.77   | 7.09  | 3.82  | 2.56  |
| 500  | -0.48     | -0.19 | -0.11 | -0.03 | -0.64   | -0.24 | -0.19 | -0.04 | 3.27     | 1.79  | 1.03  | 0.76 | 8.18    | 4.37  | 2.30  | 1.57  |
| 1000 | -0.20     | -0.11 | -0.04 | -0.02 | -0.22   | -0.24 | -0.05 | 0.05  | 2.27     | 1.37  | 0.74  | 0.51 | 5.55    | 3.12  | 1.68  | 1.06  |
|      | IV-B      |       |       |       |         |       |       |       |          |       |       |      |         |       |       |       |
| 50   | -0.38     | -0.13 | -0.01 | 0.02  | 2.27    | 0.36  | 0.09  | -0.03 | 9.86     | 5.17  | 2.37  | 1.58 | 27.53   | 13.94 | 6.48  | 4.23  |
| 100  | -0.48     | -0.02 | -0.03 | -0.02 | 0.50    | -0.07 | -0.12 | 0.12  | 6.67     | 3.41  | 1.74  | 1.24 | 21.01   | 9.51  | 4.68  | 3.14  |
| 200  | -0.05     | -0.09 | 0.02  | 0.02  | -0.14   | -0.08 | -0.14 | 0.02  | 4.66     | 2.62  | 1.33  | 0.86 | 13.84   | 6.94  | 3.51  | 2.27  |
| 500  | 0.01      | -0.05 | 0.00  | -0.01 | 0.11    | 0.04  | -0.07 | -0.03 | 3.36     | 1.54  | 0.84  | 0.56 | 9.23    | 4.20  | 2.13  | 1.47  |
| 1000 | 0.09      | 0.00  | 0.00  | 0.00  | 0.14    | -0.13 | -0.03 | 0.04  | 2.22     | 1.23  | 0.57  | 0.39 | 6.21    | 2.98  | 1.62  | 0.95  |
|      | GMM-B1    |       |       |       |         |       |       |       |          |       |       |      |         |       |       |       |
| 50   | -1.64     | -0.51 | -0.14 | -0.05 | 0.64    | 0.10  | 0.11  | 0.06  | 9.60     | 4.88  | 2.36  | 1.58 | 26.26   | 13.12 | 6.42  | 4.24  |
| 100  | -1.04     | -0.32 | -0.13 | -0.04 | -0.03   | -0.30 | -0.04 | 0.13  | 6.80     | 3.41  | 1.74  | 1.25 | 19.76   | 9.26  | 4.75  | 3.10  |
| 200  | -0.39     | -0.17 | 0.01  | 0.00  | 0.00    | -0.18 | -0.11 | 0.00  | 4.56     | 2.54  | 1.33  | 0.85 | 13.35   | 6.86  | 3.50  | 2.24  |
| 500  | -0.15     | -0.11 | 0.00  | -0.01 | 0.19    | -0.03 | -0.02 | -0.02 | 3.24     | 1.51  | 0.81  | 0.55 | 8.87    | 4.10  | 2.19  | 1.43  |
| 1000 | -0.03     | -0.02 | -0.02 | -0.01 | 0.03    | -0.09 | -0.05 | 0.06  | 2.10     | 1.15  | 0.58  | 0.39 | 5.94    | 3.08  | 1.58  | 0.95  |
|      | GMM-B3    |       |       |       |         |       |       |       |          |       |       |      |         |       |       |       |
| 50   | -3.90     | -1.23 | -0.34 | -0.12 | -0.39   | 0.04  | 0.11  | 0.05  | 8.78     | 4.79  | 2.35  | 1.53 | 24.82   | 12.97 | 6.34  | 4.17  |
| 100  | -2.18     | -0.69 | -0.24 | -0.08 | -1.03   | -0.35 | 0.04  | 0.10  | 6.57     | 3.35  | 1.74  | 1.22 | 18.10   | 9.16  | 4.68  | 3.16  |
| 200  | -0.99     | -0.35 | -0.07 | -0.02 | -0.49   | -0.26 | -0.12 | 0.03  | 4.46     | 2.48  | 1.27  | 0.85 | 13.47   | 6.87  | 3.43  | 2.27  |
| 500  | -0.36     | -0.17 | -0.04 | -0.02 | 0.14    | -0.04 | -0.03 | -0.01 | 3.14     | 1.50  | 0.82  | 0.56 | 8.74    | 4.22  | 2.20  | 1.42  |
| 1000 | -0.14     | -0.07 | -0.03 | -0.01 | -0.20   | -0.09 | -0.06 | 0.03  | 2.06     | 1.16  | 0.57  | 0.40 | 5.96    | 3.06  | 1.57  | 0.93  |
|      | HPJ       |       |       |       |         |       |       |       |          |       |       |      |         |       |       |       |
| 50   | 1.24      | 0.55  | 0.06  | 0.03  | 5.29    | 1.91  | 0.11  | -0.01 | 7.69     | 4.10  | 2.34  | 1.52 | 17.78   | 10.28 | 6.03  | 3.96  |
| 100  | 1.29      | 0.37  | 0.04  | 0.01  | 5.58    | 1.83  | 0.27  | 0.15  | 5.23     | 2.91  | 1.62  | 1.17 | 12.91   | 6.94  | 4.26  | 3.01  |
| 200  | 1.06      | 0.36  | 0.03  | 0.04  | 5.21    | 1.51  | 0.20  | 0.02  | 3.59     | 1.99  | 1.17  | 0.78 | 8.16    | 4.98  | 2.87  | 1.96  |
| 500  | 1.22      | 0.40  | 0.09  | 0.02  | 5.58    | 1.58  | 0.27  | 0.05  | 2.27     | 1.39  | 0.79  | 0.51 | 5.55    | 3.07  | 1.84  | 1.32  |
| 1000 | 1.33      | 0.43  | 0.08  | 0.02  | 5.64    | 1.54  | 0.26  | 0.08  | 1.59     | 0.94  | 0.51  | 0.38 | 3.86    | 2.20  | 1.23  | 0.90  |
|      | BOD-OLS   |       |       |       |         |       |       |       |          |       |       |      |         |       |       |       |
| 50   | -0.21     | 0.23  | 0.29  | 0.26  | 11.71   | 8.41  | 4.61  | 2.96  | 6.21     | 3.71  | 2.14  | 1.51 | 16.85   | 10.27 | 6.13  | 3.97  |
| 100  | -0.22     | 0.28  | 0.31  | 0.26  | 11.57   | 8.32  | 4.76  | 3.07  | 4.59     | 2.63  | 1.68  | 1.16 | 11.34   | 7.13  | 4.29  | 3.09  |
| 200  | -0.11     | 0.39  | 0.36  | 0.30  | 11.67   | 8.30  | 4.66  | 2.95  | 3.13     | 1.91  | 1.17  | 0.80 | 8.03    | 5.00  | 3.03  | 2.06  |
| 500  | 0.05      | 0.41  | 0.41  | 0.29  | 12.01   | 8.31  | 4.76  | 2.97  | 2.03     | 1.27  | 0.75  | 0.51 | 4.95    | 3.08  | 1.88  | 1.31  |
| 1000 | 0.11      | 0.43  | 0.38  | 0.29  | 12.04   | 8.39  | 4.77  | 2.99  | 1.43     | 0.86  | 0.50  | 0.37 | 3.42    | 2.23  | 1.33  | 0.92  |
|      | BCBOD-OLS |       |       |       |         |       |       |       |          |       |       |      |         |       |       |       |
| 50   | -0.19     | -0.08 | 0.16  | 0.13  | 1.35    | 1.12  | 0.88  | 1.31  | 19.51    | 11.85 | 7.23  | 5.30 | 42.03   | 29.19 | 19.09 | 13.56 |
| 100  | -0.74     | -0.01 | 0.03  | 0.00  | 0.20    | 0.76  | 0.37  | 0.69  | 13.06    | 8.71  | 4.96  | 3.75 | 32.76   | 20.75 | 13.38 | 9.40  |
| 200  | -0.60     | -0.17 | 0.05  | 0.07  | 0.13    | 0.30  | 0.39  | 0.33  | 9.47     | 6.03  | 3.57  | 2.49 | 22.80   | 15.22 | 9.37  | 6.36  |
| 500  | -0.51     | -0.27 | 0.01  | -0.02 | 0.88    | 0.61  | 0.21  | 0.04  | 5.76     | 3.65  | 2.40  | 1.67 | 14.04   | 8.99  | 5.87  | 4.24  |
| 1000 | -0.44     | -0.14 | -0.03 | -0.01 | 1.26    | 1.03  | 0.25  | 0.17  | 3.63     | 2.74  | 1.60  | 1.26 | 9.87    | 6.67  | 3.94  | 3.03  |

Table S.6: Fixed effects model, MAE and Size ( $\alpha = 0.4$ ,  $\beta = 1$ ,  $\sigma_\eta^2 = 5$ )

| $N/T$ | MAE       |       |      |      |         |       |       |      | Size     |       |       |      |         |      |      |      |
|-------|-----------|-------|------|------|---------|-------|-------|------|----------|-------|-------|------|---------|------|------|------|
|       | $\alpha$  |       |      |      | $\beta$ |       |       |      | $\alpha$ |       |       |      | $\beta$ |      |      |      |
|       | 10        | 20    | 50   | 100  | 10      | 20    | 50    | 100  | 10       | 20    | 50    | 100  | 10      | 20   | 50   | 100  |
|       | FE        |       |      |      |         |       |       |      |          |       |       |      |         |      |      |      |
| 50    | 11.43     | 5.54  | 2.21 | 1.11 | 7.69    | 5.24  | 3.11  | 2.06 | 84.1     | 56.6  | 25.6  | 15.2 | 9.8     | 10.0 | 7.3  | 5.6  |
| 100   | 11.59     | 5.60  | 2.20 | 1.10 | 5.56    | 3.96  | 2.23  | 1.54 | 98.0     | 85.8  | 48.0  | 28.0 | 11.6    | 9.6  | 7.5  | 6.9  |
| 200   | 11.61     | 5.51  | 2.17 | 1.06 | 4.35    | 3.01  | 1.65  | 1.10 | 100.0    | 99.0  | 74.7  | 46.9 | 11.3    | 12.9 | 9.2  | 6.1  |
| 500   | 11.50     | 5.52  | 2.15 | 1.07 | 3.83    | 2.66  | 1.32  | 0.78 | 100.0    | 100.0 | 98.9  | 81.8 | 19.7    | 21.7 | 15.1 | 11.0 |
| 1000  | 11.41     | 5.51  | 2.16 | 1.07 | 3.68    | 2.55  | 1.24  | 0.70 | 100.0    | 100.0 | 100.0 | 98.9 | 33.7    | 39.0 | 27.1 | 18.5 |
|       | IV-L      |       |      |      |         |       |       |      |          |       |       |      |         |      |      |      |
| 50    | 17.81     | 10.81 | 6.04 | 4.06 | 46.20   | 21.92 | 11.33 | 7.00 | 1.0      | 3.0   | 3.1   | 4.6  | 1.3     | 2.4  | 3.2  | 4.5  |
| 100   | 13.10     | 7.38  | 3.99 | 2.87 | 31.39   | 15.72 | 7.17  | 4.78 | 1.4      | 4.5   | 4.2   | 5.1  | 1.5     | 3.3  | 3.9  | 4.1  |
| 200   | 9.20      | 5.08  | 2.93 | 1.95 | 22.46   | 10.78 | 5.02  | 3.44 | 2.0      | 4.7   | 5.3   | 5.7  | 2.1     | 3.9  | 3.9  | 5.1  |
| 500   | 5.47      | 3.37  | 1.88 | 1.30 | 14.33   | 7.03  | 3.40  | 2.26 | 3.4      | 3.8   | 4.5   | 5.7  | 3.3     | 3.2  | 4.2  | 5.3  |
| 1000  | 3.98      | 2.25  | 1.37 | 0.96 | 10.00   | 4.72  | 2.40  | 1.62 | 5.2      | 4.1   | 4.5   | 5.9  | 5.2     | 3.6  | 4.8  | 5.8  |
|       | GMM-L1    |       |      |      |         |       |       |      |          |       |       |      |         |      |      |      |
| 50    | 9.13      | 5.84  | 3.30 | 2.41 | 23.44   | 12.19 | 6.43  | 4.34 | 5.3      | 5.9   | 6.0   | 5.9  | 5.1     | 6.8  | 5.8  | 6.1  |
| 100   | 7.86      | 4.77  | 2.95 | 2.17 | 20.11   | 10.33 | 5.37  | 3.67 | 4.4      | 6.0   | 4.9   | 5.8  | 4.2     | 5.4  | 4.9  | 5.0  |
| 200   | 6.41      | 4.02  | 2.19 | 1.63 | 15.13   | 7.95  | 3.94  | 2.82 | 5.0      | 4.5   | 4.8   | 5.5  | 5.0     | 4.0  | 4.5  | 5.0  |
| 500   | 4.54      | 2.66  | 1.61 | 1.18 | 10.75   | 5.60  | 2.95  | 1.99 | 5.5      | 4.1   | 4.4   | 5.1  | 5.6     | 4.0  | 3.6  | 4.5  |
| 1000  | 3.35      | 1.96  | 1.22 | 0.82 | 7.89    | 4.17  | 2.14  | 1.43 | 5.4      | 4.7   | 5.6   | 5.4  | 5.5     | 3.8  | 5.8  | 4.5  |
|       | GMM-L3    |       |      |      |         |       |       |      |          |       |       |      |         |      |      |      |
| 50    | 5.02      | 2.72  | 1.48 | 1.03 | 11.30   | 6.46  | 3.41  | 2.42 | 8.1      | 6.0   | 5.8   | 6.4  | 5.7     | 6.8  | 7.1  | 6.4  |
| 100   | 3.60      | 2.04  | 1.06 | 0.80 | 8.74    | 4.72  | 2.57  | 1.77 | 8.0      | 6.4   | 6.4   | 7.3  | 7.9     | 7.5  | 5.7  | 5.7  |
| 200   | 2.48      | 1.48  | 0.78 | 0.56 | 6.43    | 3.61  | 1.89  | 1.29 | 5.7      | 5.2   | 5.7   | 6.0  | 5.7     | 6.4  | 5.5  | 5.7  |
| 500   | 1.64      | 0.93  | 0.53 | 0.38 | 4.11    | 2.22  | 1.18  | 0.77 | 4.6      | 5.6   | 5.6   | 5.8  | 6.0     | 5.2  | 5.0  | 5.9  |
| 1000  | 1.10      | 0.68  | 0.36 | 0.26 | 2.75    | 1.59  | 0.84  | 0.53 | 4.7      | 5.4   | 4.2   | 4.8  | 5.6     | 5.5  | 5.9  | 5.0  |
|       | IV-B      |       |      |      |         |       |       |      |          |       |       |      |         |      |      |      |
| 50    | 4.90      | 2.59  | 1.18 | 0.78 | 14.03   | 6.99  | 3.26  | 2.12 | 6.2      | 4.7   | 5.7   | 5.4  | 5.9     | 6.6  | 6.5  | 6.4  |
| 100   | 3.40      | 1.71  | 0.88 | 0.63 | 10.30   | 4.76  | 2.33  | 1.56 | 5.7      | 4.9   | 5.7   | 5.2  | 5.1     | 7.1  | 6.4  | 5.5  |
| 200   | 2.33      | 1.30  | 0.67 | 0.43 | 6.93    | 3.47  | 1.75  | 1.13 | 4.5      | 4.5   | 5.8   | 3.8  | 5.0     | 5.8  | 4.7  | 5.1  |
| 500   | 1.69      | 0.78  | 0.42 | 0.28 | 4.60    | 2.09  | 1.06  | 0.73 | 4.8      | 4.1   | 4.8   | 6.1  | 5.6     | 5.0  | 5.4  | 5.6  |
| 1000  | 1.11      | 0.61  | 0.29 | 0.19 | 3.11    | 1.50  | 0.80  | 0.47 | 3.8      | 6.1   | 5.2   | 5.3  | 4.2     | 4.8  | 5.3  | 6.4  |
|       | GMM-B1    |       |      |      |         |       |       |      |          |       |       |      |         |      |      |      |
| 50    | 5.03      | 2.46  | 1.17 | 0.78 | 12.82   | 6.62  | 3.18  | 2.08 | 7.1      | 4.6   | 5.4   | 5.6  | 6.4     | 6.5  | 6.8  | 6.2  |
| 100   | 3.52      | 1.76  | 0.87 | 0.63 | 9.88    | 4.60  | 2.35  | 1.56 | 6.3      | 5.2   | 5.8   | 5.2  | 5.9     | 6.3  | 6.0  | 5.1  |
| 200   | 2.31      | 1.24  | 0.65 | 0.42 | 6.68    | 3.41  | 1.73  | 1.12 | 5.1      | 4.9   | 5.6   | 4.6  | 5.3     | 5.9  | 5.0  | 4.7  |
| 500   | 1.64      | 0.75  | 0.41 | 0.28 | 4.43    | 2.03  | 1.09  | 0.71 | 4.6      | 3.8   | 4.7   | 5.7  | 5.3     | 5.1  | 5.7  | 6.1  |
| 1000  | 1.04      | 0.58  | 0.29 | 0.20 | 3.00    | 1.53  | 0.80  | 0.47 | 3.7      | 6.0   | 4.5   | 5.5  | 4.3     | 4.9  | 5.3  | 6.3  |
|       | GMM-B3    |       |      |      |         |       |       |      |          |       |       |      |         |      |      |      |
| 50    | 5.28      | 2.50  | 1.17 | 0.76 | 12.44   | 6.48  | 3.15  | 2.08 | 9.2      | 5.3   | 5.2   | 5.8  | 6.7     | 7.6  | 6.7  | 5.9  |
| 100   | 3.68      | 1.75  | 0.88 | 0.61 | 9.27    | 4.53  | 2.34  | 1.58 | 7.7      | 5.9   | 5.9   | 5.2  | 5.6     | 6.1  | 6.0  | 5.6  |
| 200   | 2.24      | 1.29  | 0.65 | 0.43 | 6.86    | 3.47  | 1.72  | 1.13 | 6.4      | 4.5   | 5.9   | 5.2  | 4.9     | 5.3  | 4.7  | 4.7  |
| 500   | 1.60      | 0.77  | 0.40 | 0.28 | 4.36    | 2.10  | 1.09  | 0.71 | 4.7      | 3.9   | 4.7   | 5.7  | 6.1     | 5.2  | 6.0  | 6.0  |
| 1000  | 1.03      | 0.58  | 0.29 | 0.19 | 2.99    | 1.51  | 0.78  | 0.47 | 3.6      | 6.5   | 4.7   | 5.8  | 4.6     | 5.2  | 5.7  | 6.3  |
|       | HPJ       |       |      |      |         |       |       |      |          |       |       |      |         |      |      |      |
| 50    | 3.92      | 2.05  | 1.16 | 0.76 | 9.50    | 5.24  | 3.10  | 1.98 | 8.1      | 5.7   | 5.3   | 4.6  | 9.0     | 6.3  | 4.6  | 4.8  |
| 100   | 2.76      | 1.44  | 0.82 | 0.59 | 7.56    | 3.92  | 2.14  | 1.50 | 8.4      | 5.5   | 5.5   | 5.5  | 10.3    | 5.4  | 5.1  | 4.1  |
| 200   | 1.99      | 1.06  | 0.58 | 0.39 | 5.92    | 2.77  | 1.46  | 0.99 | 9.1      | 5.2   | 5.5   | 5.9  | 13.2    | 7.0  | 4.5  | 4.0  |
| 500   | 1.51      | 0.74  | 0.41 | 0.26 | 5.62    | 1.91  | 0.96  | 0.65 | 12.0     | 7.2   | 5.3   | 6.1  | 29.6    | 8.6  | 4.6  | 5.9  |
| 1000  | 1.38      | 0.57  | 0.26 | 0.19 | 5.64    | 1.63  | 0.65  | 0.45 | 20.8     | 10.4  | 4.8   | 5.0  | 52.0    | 13.1 | 5.3  | 5.4  |
|       | BOD-OLS   |       |      |      |         |       |       |      |          |       |       |      |         |      |      |      |
| 50    | 3.12      | 1.83  | 1.13 | 0.74 | 12.54   | 8.72  | 4.79  | 3.06 | 6.3      | 4.8   | 5.7   | 6.2  | 20.6    | 24.9 | 22.0 | 19.5 |
| 100   | 2.33      | 1.33  | 0.84 | 0.61 | 11.60   | 8.33  | 4.76  | 3.07 | 5.6      | 6.0   | 6.7   | 7.1  | 29.3    | 37.1 | 36.1 | 32.2 |
| 200   | 1.54      | 1.01  | 0.62 | 0.45 | 11.67   | 8.30  | 4.66  | 2.95 | 5.3      | 5.6   | 7.5   | 8.3  | 52.1    | 62.8 | 60.1 | 51.1 |
| 500   | 1.01      | 0.69  | 0.49 | 0.35 | 12.01   | 8.31  | 4.76  | 2.97 | 5.1      | 6.6   | 11.8  | 14.2 | 90.3    | 95.5 | 94.0 | 87.3 |
| 1000  | 0.71      | 0.56  | 0.40 | 0.30 | 12.04   | 8.39  | 4.77  | 2.99 | 4.2      | 9.4   | 17.2  | 20.0 | 99.6    | 99.9 | 99.8 | 99.1 |
|       | BCBOD-OLS |       |      |      |         |       |       |      |          |       |       |      |         |      |      |      |
| 50    | 9.58      | 5.93  | 3.60 | 2.65 | 20.89   | 14.43 | 9.67  | 6.77 | 51.6     | 50.2  | 52.6  | 55.7 | 43.5    | 48.8 | 53.6 | 54.5 |
| 100   | 6.53      | 4.36  | 2.48 | 1.86 | 16.28   | 10.20 | 6.59  | 4.72 | 49.2     | 52.2  | 51.4  | 54.2 | 48.7    | 49.2 | 53.2 | 56.1 |
| 200   | 4.70      | 3.00  | 1.79 | 1.26 | 11.41   | 7.53  | 4.69  | 3.25 | 50.2     | 51.4  | 52.0  | 52.8 | 49.2    | 50.9 | 53.7 | 54.9 |
| 500   | 2.94      | 1.86  | 1.18 | 0.83 | 7.01    | 4.43  | 2.93  | 2.09 | 50.5     | 50.9  | 53.8  | 55.5 | 48.1    | 48.4 | 54.2 | 55.4 |
| 1000  | 1.91      | 1.36  | 0.80 | 0.63 | 5.10    | 3.52  | 2.01  | 1.50 | 45.2     | 52.1  | 52.5  | 56.6 | 48.8    | 53.0 | 52.0 | 55.8 |

Table S.7: Fixed effects model, Bias and IQR ( $\alpha = 0.8$ ,  $\beta = 1$ ,  $\sigma_\eta^2 = 5$ )

| N/T  | Bias      |       |       |       |         |       |       |       | IQR      |       |       |       |         |       |       |       |
|------|-----------|-------|-------|-------|---------|-------|-------|-------|----------|-------|-------|-------|---------|-------|-------|-------|
|      | $\alpha$  |       |       |       | $\beta$ |       |       |       | $\alpha$ |       |       |       | $\beta$ |       |       |       |
|      | 10        | 20    | 50    | 100   | 10      | 20    | 50    | 100   | 10       | 20    | 50    | 100   | 10      | 20    | 50    | 100   |
|      | FE        |       |       |       |         |       |       |       |          |       |       |       |         |       |       |       |
| 50   | -15.05    | -6.91 | -2.57 | -1.20 | 0.57    | 2.30  | 1.54  | 0.86  | 4.65     | 2.71  | 1.57  | 0.97  | 13.95   | 9.60  | 5.77  | 3.92  |
| 100  | -15.14    | -6.85 | -2.52 | -1.23 | 0.11    | 2.22  | 1.39  | 0.94  | 3.46     | 1.98  | 1.07  | 0.67  | 10.37   | 6.65  | 4.06  | 2.94  |
| 200  | -15.08    | -6.91 | -2.50 | -1.21 | 0.26    | 2.09  | 1.45  | 0.79  | 2.33     | 1.38  | 0.74  | 0.48  | 7.12    | 4.49  | 2.84  | 1.97  |
| 500  | -15.01    | -6.88 | -2.48 | -1.19 | 0.69    | 2.21  | 1.54  | 0.84  | 1.55     | 0.83  | 0.48  | 0.32  | 4.75    | 2.92  | 1.77  | 1.27  |
| 1000 | -14.92    | -6.86 | -2.48 | -1.20 | 0.58    | 2.22  | 1.49  | 0.89  | 1.06     | 0.63  | 0.31  | 0.22  | 3.15    | 2.00  | 1.23  | 0.87  |
|      | IV-L      |       |       |       |         |       |       |       |          |       |       |       |         |       |       |       |
| 50   | 1.58      | 4.30  | 1.63  | 0.70  | 2.98    | 7.03  | 1.81  | 0.86  | 53.22    | 31.07 | 17.89 | 11.58 | 105.31  | 53.17 | 24.56 | 14.34 |
| 100  | 3.63      | 1.53  | 0.19  | -0.15 | 7.80    | 2.13  | 0.29  | -0.31 | 46.23    | 27.00 | 11.86 | 8.05  | 87.34   | 43.08 | 16.25 | 9.58  |
| 200  | -0.27     | 0.58  | 0.13  | -0.14 | -0.80   | 0.81  | -0.03 | -0.11 | 38.00    | 18.44 | 8.60  | 5.41  | 73.81   | 31.03 | 11.33 | 6.77  |
| 500  | -0.24     | 0.32  | 0.36  | 0.05  | 0.48    | 0.27  | 0.28  | 0.00  | 25.98    | 12.20 | 5.66  | 3.57  | 50.10   | 19.79 | 7.35  | 4.38  |
| 1000 | -0.14     | 0.27  | 0.18  | 0.09  | -0.06   | 0.23  | 0.25  | 0.14  | 18.54    | 8.29  | 4.00  | 2.56  | 35.55   | 13.58 | 5.33  | 3.13  |
|      | GMM-L1    |       |       |       |         |       |       |       |          |       |       |       |         |       |       |       |
| 50   | -12.31    | -4.67 | -1.92 | -0.94 | -21.83  | -7.56 | -2.17 | -1.05 | 19.18    | 11.38 | 5.73  | 4.14  | 41.30   | 20.50 | 8.89  | 6.25  |
| 100  | -11.57    | -4.62 | -1.83 | -0.95 | -19.02  | -7.11 | -2.58 | -1.09 | 18.76    | 10.73 | 5.37  | 3.89  | 37.74   | 18.82 | 8.12  | 5.32  |
| 200  | -9.66     | -3.93 | -1.61 | -0.77 | -18.43  | -6.77 | -2.14 | -0.95 | 18.04    | 9.16  | 4.94  | 3.35  | 34.32   | 15.42 | 6.84  | 3.99  |
| 500  | -6.41     | -2.39 | -0.74 | -0.49 | -12.74  | -4.25 | -1.11 | -0.55 | 15.11    | 7.21  | 3.66  | 2.50  | 29.33   | 11.50 | 5.26  | 3.08  |
| 1000 | -4.30     | -1.15 | -0.40 | -0.16 | -8.34   | -2.05 | -0.56 | -0.21 | 11.80    | 5.85  | 2.89  | 1.94  | 23.34   | 9.83  | 4.13  | 2.37  |
|      | GMM-L3    |       |       |       |         |       |       |       |          |       |       |       |         |       |       |       |
| 50   | -10.64    | -3.96 | -1.26 | -0.48 | -14.63  | -4.11 | -1.06 | -0.32 | 10.03    | 5.60  | 2.65  | 1.72  | 25.13   | 12.84 | 6.56  | 4.40  |
| 100  | -7.62     | -2.91 | -0.84 | -0.34 | -11.50  | -3.40 | -0.91 | -0.16 | 9.26     | 4.43  | 2.17  | 1.55  | 21.55   | 9.96  | 4.91  | 3.16  |
| 200  | -5.42     | -1.70 | -0.49 | -0.17 | -8.37   | -2.52 | -0.66 | -0.22 | 7.40     | 3.73  | 1.70  | 1.07  | 16.32   | 8.03  | 3.70  | 2.30  |
| 500  | -2.75     | -0.76 | -0.17 | -0.07 | -4.41   | -1.06 | -0.22 | -0.06 | 5.00     | 2.46  | 1.18  | 0.76  | 11.14   | 4.94  | 2.36  | 1.51  |
| 1000 | -1.39     | -0.41 | -0.10 | -0.06 | -2.27   | -0.58 | -0.13 | 0.02  | 3.91     | 1.87  | 0.84  | 0.52  | 8.68    | 3.59  | 1.67  | 1.06  |
|      | IV-B      |       |       |       |         |       |       |       |          |       |       |       |         |       |       |       |
| 50   | -0.69     | 0.27  | -0.01 | -0.03 | 0.88    | 0.56  | -0.06 | -0.04 | 18.89    | 6.26  | 2.15  | 1.23  | 41.27   | 15.56 | 6.57  | 4.12  |
| 100  | -1.06     | 0.07  | -0.04 | -0.05 | -0.50   | 0.11  | -0.03 | 0.07  | 12.95    | 4.58  | 1.65  | 0.92  | 30.19   | 10.98 | 4.66  | 3.01  |
| 200  | -0.10     | 0.02  | 0.02  | -0.01 | -0.40   | -0.31 | -0.11 | 0.04  | 9.15     | 3.17  | 1.15  | 0.64  | 20.41   | 7.42  | 3.45  | 2.19  |
| 500  | -0.03     | 0.01  | 0.02  | 0.01  | 0.38    | 0.07  | -0.02 | -0.03 | 5.98     | 1.96  | 0.72  | 0.43  | 13.74   | 4.73  | 2.18  | 1.42  |
| 1000 | 0.07      | 0.02  | 0.01  | 0.00  | 0.29    | 0.01  | -0.03 | 0.03  | 4.06     | 1.50  | 0.48  | 0.31  | 9.37    | 3.44  | 1.64  | 0.98  |
|      | GMM-B1    |       |       |       |         |       |       |       |          |       |       |       |         |       |       |       |
| 50   | -5.97     | -1.14 | -0.26 | -0.12 | -6.75   | -0.77 | 0.16  | 0.01  | 14.61    | 5.64  | 2.03  | 1.17  | 32.25   | 14.79 | 6.47  | 4.10  |
| 100  | -3.70     | -0.63 | -0.13 | -0.09 | -4.97   | -0.85 | -0.07 | 0.08  | 10.65    | 4.37  | 1.50  | 0.89  | 24.32   | 9.99  | 4.78  | 3.08  |
| 200  | -1.76     | -0.31 | -0.05 | -0.03 | -2.06   | -0.66 | -0.16 | 0.03  | 8.14     | 3.07  | 1.09  | 0.61  | 18.14   | 7.44  | 3.42  | 2.19  |
| 500  | -0.83     | -0.18 | 0.01  | 0.00  | -1.08   | -0.13 | 0.00  | -0.03 | 5.05     | 1.91  | 0.70  | 0.40  | 12.31   | 4.60  | 2.19  | 1.39  |
| 1000 | -0.40     | -0.05 | 0.00  | -0.01 | -0.45   | -0.10 | -0.02 | 0.05  | 3.67     | 1.41  | 0.48  | 0.29  | 8.54    | 3.47  | 1.61  | 0.98  |
|      | GMM-B3    |       |       |       |         |       |       |       |          |       |       |       |         |       |       |       |
| 50   | -10.63    | -2.98 | -0.61 | -0.27 | -11.36  | -2.03 | 0.03  | 0.07  | 11.55    | 4.73  | 2.10  | 1.12  | 28.72   | 13.49 | 6.39  | 4.14  |
| 100  | -7.20     | -1.76 | -0.37 | -0.17 | -9.54   | -1.55 | -0.14 | 0.12  | 9.37     | 3.86  | 1.48  | 0.86  | 22.23   | 9.93  | 4.57  | 3.07  |
| 200  | -4.31     | -0.96 | -0.19 | -0.07 | -5.72   | -1.31 | -0.21 | 0.07  | 6.99     | 2.98  | 1.05  | 0.62  | 17.21   | 7.27  | 3.30  | 2.15  |
| 500  | -1.97     | -0.40 | -0.03 | -0.03 | -2.64   | -0.36 | -0.02 | -0.02 | 4.77     | 1.81  | 0.71  | 0.40  | 11.13   | 4.68  | 2.12  | 1.40  |
| 1000 | -0.95     | -0.21 | -0.02 | -0.02 | -1.60   | -0.21 | -0.03 | 0.04  | 3.63     | 1.38  | 0.48  | 0.30  | 8.23    | 3.30  | 1.63  | 0.97  |
|      | HPJ       |       |       |       |         |       |       |       |          |       |       |       |         |       |       |       |
| 50   | 2.04      | 1.21  | 0.30  | 0.09  | 7.50    | 4.21  | 0.75  | 0.21  | 8.05     | 4.21  | 1.91  | 1.04  | 18.86   | 10.27 | 5.96  | 3.93  |
| 100  | 1.93      | 1.21  | 0.36  | 0.09  | 7.98    | 4.08  | 0.82  | 0.33  | 5.35     | 2.85  | 1.28  | 0.73  | 13.53   | 7.23  | 4.15  | 2.95  |
| 200  | 1.87      | 1.27  | 0.33  | 0.09  | 7.51    | 3.82  | 0.80  | 0.21  | 3.68     | 1.97  | 0.90  | 0.53  | 8.60    | 5.08  | 2.82  | 1.96  |
| 500  | 2.00      | 1.20  | 0.37  | 0.11  | 7.87    | 3.88  | 0.84  | 0.21  | 2.42     | 1.30  | 0.59  | 0.34  | 5.80    | 3.05  | 1.84  | 1.29  |
| 1000 | 1.93      | 1.17  | 0.36  | 0.10  | 8.02    | 3.87  | 0.84  | 0.24  | 1.71     | 0.94  | 0.38  | 0.24  | 4.04    | 2.28  | 1.24  | 0.88  |
|      | BOD-OLS   |       |       |       |         |       |       |       |          |       |       |       |         |       |       |       |
| 50   | 0.35      | 0.81  | 0.64  | 0.53  | 8.69    | 6.92  | 4.01  | 2.61  | 4.99     | 2.50  | 1.51  | 0.95  | 16.08   | 10.06 | 5.95  | 3.98  |
| 100  | 0.51      | 0.89  | 0.76  | 0.52  | 8.23    | 6.53  | 4.06  | 2.71  | 3.52     | 2.00  | 1.05  | 0.71  | 11.29   | 7.02  | 4.26  | 2.99  |
| 200  | 0.53      | 0.84  | 0.75  | 0.56  | 8.10    | 6.52  | 4.03  | 2.60  | 2.43     | 1.39  | 0.71  | 0.48  | 8.00    | 4.75  | 2.89  | 1.99  |
| 500  | 0.77      | 0.95  | 0.79  | 0.59  | 8.60    | 6.60  | 4.09  | 2.63  | 1.69     | 0.86  | 0.50  | 0.32  | 4.86    | 2.99  | 1.82  | 1.32  |
| 1000 | 0.82      | 0.94  | 0.79  | 0.58  | 8.49    | 6.63  | 4.08  | 2.66  | 1.12     | 0.60  | 0.34  | 0.22  | 3.45    | 2.22  | 1.31  | 0.88  |
|      | BCBOD-OLS |       |       |       |         |       |       |       |          |       |       |       |         |       |       |       |
| 50   | 0.88      | 0.22  | 0.07  | 0.11  | 2.29    | 1.74  | 1.05  | 1.28  | 19.37    | 12.75 | 7.58  | 5.58  | 41.88   | 27.42 | 18.14 | 12.32 |
| 100  | -0.94     | 0.23  | 0.24  | 0.04  | 0.46    | 1.20  | 0.48  | 0.68  | 13.91    | 9.14  | 5.61  | 3.92  | 31.58   | 19.33 | 12.28 | 8.79  |
| 200  | -0.39     | -0.19 | 0.07  | 0.14  | 0.59    | 0.61  | 0.52  | 0.39  | 10.03    | 6.51  | 3.69  | 2.67  | 22.80   | 14.21 | 8.66  | 5.92  |
| 500  | -0.58     | -0.31 | -0.01 | 0.04  | 1.26    | 1.10  | 0.43  | 0.28  | 5.85     | 4.26  | 2.54  | 1.80  | 13.24   | 8.58  | 5.43  | 3.94  |
| 1000 | -0.55     | -0.12 | 0.04  | 0.03  | 1.48    | 1.44  | 0.54  | 0.29  | 4.33     | 3.11  | 1.76  | 1.30  | 9.81    | 6.54  | 3.74  | 2.85  |

Table S.8: Fixed effects model, MAE and Size ( $\alpha = 0.8$ ,  $\beta = 1$ ,  $\sigma_\eta^2 = 5$ )

| N/T  | MAE       |       |      |      |         |       |       |      | Size     |       |       |       |         |      |      |      |
|------|-----------|-------|------|------|---------|-------|-------|------|----------|-------|-------|-------|---------|------|------|------|
|      | $\alpha$  |       |      |      | $\beta$ |       |       |      | $\alpha$ |       |       |       | $\beta$ |      |      |      |
|      | 10        | 20    | 50   | 100  | 10      | 20    | 50    | 100  | 10       | 20    | 50    | 100   | 10      | 20   | 50   | 100  |
|      | FE        |       |      |      |         |       |       |      |          |       |       |       |         |      |      |      |
| 50   | 15.05     | 6.91  | 2.57 | 1.20 | 7.00    | 5.01  | 3.03  | 2.02 | 99.3     | 95.2  | 65.0  | 40.3  | 8.4     | 9.6  | 8.5  | 6.6  |
| 100  | 15.14     | 6.85  | 2.52 | 1.23 | 5.17    | 3.72  | 2.31  | 1.59 | 100.0    | 99.9  | 91.2  | 67.4  | 7.1     | 8.9  | 9.0  | 8.1  |
| 200  | 15.08     | 6.91  | 2.50 | 1.21 | 3.48    | 2.87  | 1.76  | 1.15 | 100.0    | 100.0 | 99.7  | 90.4  | 6.5     | 11.2 | 11.1 | 9.3  |
| 500  | 15.01     | 6.88  | 2.48 | 1.19 | 2.32    | 2.31  | 1.56  | 0.91 | 100.0    | 100.0 | 100.0 | 99.9  | 5.5     | 18.0 | 21.5 | 15.6 |
| 1000 | 14.92     | 6.86  | 2.48 | 1.20 | 1.68    | 2.24  | 1.49  | 0.90 | 100.0    | 100.0 | 100.0 | 100.0 | 5.6     | 30.1 | 37.7 | 29.3 |
|      | IV-L      |       |      |      |         |       |       |      |          |       |       |       |         |      |      |      |
| 50   | 26.23     | 16.62 | 9.08 | 5.63 | 53.40   | 26.80 | 12.81 | 7.10 | 0.2      | 0.8   | 3.0   | 4.9   | 0.7     | 0.8  | 2.4  | 4.3  |
| 100  | 23.22     | 13.45 | 5.73 | 4.03 | 45.27   | 21.64 | 8.18  | 4.73 | 0.2      | 1.6   | 3.6   | 4.6   | 0.2     | 1.1  | 2.8  | 3.4  |
| 200  | 19.34     | 9.31  | 4.19 | 2.73 | 36.94   | 15.54 | 5.70  | 3.34 | 0.2      | 1.7   | 4.3   | 4.6   | 0.1     | 1.8  | 2.9  | 4.0  |
| 500  | 12.95     | 6.11  | 2.86 | 1.79 | 24.79   | 9.91  | 3.72  | 2.18 | 0.6      | 2.0   | 4.7   | 4.8   | 0.8     | 1.8  | 4.0  | 4.2  |
| 1000 | 9.24      | 4.14  | 1.99 | 1.28 | 17.49   | 6.79  | 2.70  | 1.56 | 1.2      | 2.7   | 4.5   | 5.6   | 1.2     | 2.2  | 4.2  | 4.4  |
|      | GMM-L1    |       |      |      |         |       |       |      |          |       |       |       |         |      |      |      |
| 50   | 13.18     | 6.06  | 3.11 | 2.10 | 25.43   | 10.97 | 4.85  | 3.08 | 9.1      | 6.9   | 5.8   | 6.1   | 8.2     | 6.7  | 6.5  | 6.6  |
| 100  | 12.65     | 6.27  | 3.06 | 1.96 | 22.79   | 11.12 | 4.54  | 2.65 | 6.8      | 4.9   | 6.1   | 5.1   | 5.6     | 4.6  | 4.7  | 5.1  |
| 200  | 11.23     | 5.17  | 2.66 | 1.67 | 21.41   | 9.30  | 3.80  | 2.16 | 5.9      | 4.7   | 5.6   | 5.4   | 5.6     | 4.3  | 5.9  | 4.7  |
| 500  | 8.54      | 3.94  | 1.93 | 1.26 | 16.27   | 6.51  | 2.77  | 1.53 | 6.2      | 3.4   | 4.3   | 4.5   | 5.7     | 3.7  | 3.8  | 5.1  |
| 1000 | 6.59      | 3.00  | 1.47 | 0.94 | 12.85   | 4.84  | 2.04  | 1.16 | 5.9      | 4.5   | 5.3   | 4.1   | 5.3     | 3.7  | 4.9  | 4.1  |
|      | GMM-L3    |       |      |      |         |       |       |      |          |       |       |       |         |      |      |      |
| 50   | 10.70     | 4.13  | 1.66 | 0.93 | 16.77   | 7.12  | 3.41  | 2.20 | 22.8     | 13.9  | 8.1   | 8.5   | 12.2    | 8.5  | 5.9  | 6.4  |
| 100  | 7.78      | 3.13  | 1.25 | 0.78 | 13.31   | 5.56  | 2.48  | 1.61 | 19.4     | 9.9   | 8.3   | 7.5   | 13.6    | 9.0  | 5.5  | 6.2  |
| 200  | 5.65      | 2.21  | 0.92 | 0.55 | 9.90    | 4.11  | 1.93  | 1.15 | 13.7     | 8.7   | 5.8   | 6.2   | 9.8     | 8.2  | 4.9  | 5.4  |
| 500  | 3.31      | 1.31  | 0.61 | 0.39 | 6.55    | 2.63  | 1.18  | 0.76 | 9.0      | 7.4   | 6.2   | 5.3   | 8.5     | 5.8  | 5.8  | 5.9  |
| 1000 | 2.20      | 0.97  | 0.42 | 0.26 | 4.47    | 1.83  | 0.85  | 0.53 | 7.8      | 6.5   | 5.1   | 6.3   | 6.5     | 6.2  | 6.8  | 5.7  |
|      | IV-B      |       |      |      |         |       |       |      |          |       |       |       |         |      |      |      |
| 50   | 9.42      | 3.15  | 1.07 | 0.61 | 20.56   | 7.62  | 3.27  | 2.06 | 2.9      | 4.8   | 5.2   | 5.9   | 2.7     | 6.7  | 6.6  | 5.6  |
| 100  | 6.50      | 2.29  | 0.83 | 0.47 | 15.09   | 5.51  | 2.33  | 1.50 | 4.1      | 4.7   | 5.8   | 4.8   | 4.2     | 6.4  | 6.4  | 5.4  |
| 200  | 4.65      | 1.56  | 0.58 | 0.32 | 10.19   | 3.68  | 1.72  | 1.10 | 4.1      | 4.3   | 5.6   | 5.2   | 5.6     | 5.8  | 4.8  | 5.2  |
| 500  | 2.99      | 0.98  | 0.35 | 0.22 | 6.88    | 2.36  | 1.08  | 0.71 | 5.1      | 4.2   | 5.0   | 5.6   | 6.0     | 4.3  | 5.1  | 6.4  |
| 1000 | 2.02      | 0.75  | 0.24 | 0.15 | 4.58    | 1.73  | 0.82  | 0.49 | 4.5      | 6.1   | 4.8   | 4.8   | 4.5     | 4.8  | 6.1  | 6.1  |
|      | GMM-B1    |       |      |      |         |       |       |      |          |       |       |       |         |      |      |      |
| 50   | 8.34      | 2.85  | 1.05 | 0.58 | 16.46   | 7.31  | 3.23  | 2.05 | 9.4      | 5.3   | 4.6   | 6.7   | 5.8     | 6.9  | 5.9  | 6.3  |
| 100  | 6.23      | 2.13  | 0.77 | 0.45 | 12.68   | 4.97  | 2.33  | 1.55 | 7.2      | 4.9   | 6.0   | 4.9   | 4.9     | 6.6  | 6.4  | 5.2  |
| 200  | 4.21      | 1.47  | 0.55 | 0.30 | 9.18    | 3.73  | 1.70  | 1.10 | 5.1      | 4.0   | 5.8   | 5.6   | 5.4     | 5.7  | 5.1  | 5.0  |
| 500  | 2.65      | 0.96  | 0.35 | 0.20 | 6.15    | 2.37  | 1.08  | 0.70 | 5.0      | 4.6   | 4.8   | 5.8   | 6.2     | 4.3  | 5.6  | 6.3  |
| 1000 | 1.84      | 0.70  | 0.24 | 0.15 | 4.29    | 1.75  | 0.80  | 0.48 | 4.9      | 6.0   | 5.2   | 4.9   | 4.5     | 5.6  | 6.0  | 6.0  |
|      | GMM-B3    |       |      |      |         |       |       |      |          |       |       |       |         |      |      |      |
| 50   | 10.77     | 3.33  | 1.12 | 0.58 | 16.37   | 6.92  | 3.19  | 2.04 | 23.2     | 10.5  | 6.3   | 6.6   | 8.4     | 7.7  | 6.0  | 6.4  |
| 100  | 7.47      | 2.22  | 0.81 | 0.45 | 12.97   | 4.96  | 2.31  | 1.53 | 18.6     | 9.4   | 6.7   | 5.1   | 10.2    | 6.3  | 5.8  | 5.6  |
| 200  | 4.77      | 1.57  | 0.57 | 0.31 | 9.16    | 3.63  | 1.65  | 1.08 | 12.3     | 7.2   | 5.9   | 5.4   | 8.4     | 5.8  | 4.5  | 5.0  |
| 500  | 2.82      | 0.93  | 0.34 | 0.19 | 5.70    | 2.39  | 1.05  | 0.70 | 7.2      | 5.6   | 5.3   | 5.7   | 6.7     | 4.5  | 6.0  | 6.1  |
| 1000 | 1.97      | 0.70  | 0.24 | 0.15 | 4.20    | 1.69  | 0.82  | 0.49 | 6.6      | 6.0   | 5.2   | 5.1   | 5.0     | 6.2  | 5.3  | 6.1  |
|      | HPJ       |       |      |      |         |       |       |      |          |       |       |       |         |      |      |      |
| 50   | 4.14      | 2.11  | 0.99 | 0.53 | 10.47   | 6.28  | 2.95  | 1.92 | 10.5     | 9.5   | 7.5   | 5.2   | 11.9    | 9.2  | 4.9  | 4.6  |
| 100  | 3.13      | 1.56  | 0.68 | 0.37 | 8.92    | 4.75  | 2.17  | 1.51 | 13.0     | 13.5  | 7.8   | 5.6   | 16.3    | 12.0 | 5.5  | 4.3  |
| 200  | 2.42      | 1.38  | 0.51 | 0.28 | 7.68    | 4.05  | 1.50  | 1.02 | 16.8     | 17.9  | 9.7   | 7.3   | 23.3    | 16.7 | 6.5  | 4.6  |
| 500  | 2.04      | 1.22  | 0.41 | 0.19 | 7.87    | 3.89  | 1.08  | 0.65 | 26.5     | 33.8  | 15.5  | 7.4   | 49.5    | 35.4 | 9.0  | 6.1  |
| 1000 | 1.93      | 1.17  | 0.37 | 0.14 | 8.02    | 3.87  | 0.95  | 0.49 | 43.3     | 51.1  | 23.4  | 9.0   | 78.9    | 61.3 | 15.4 | 6.4  |
|      | BOD-OLS   |       |      |      |         |       |       |      |          |       |       |       |         |      |      |      |
| 50   | 2.55      | 1.45  | 0.88 | 0.62 | 9.93    | 7.51  | 4.27  | 2.79 | 6.8      | 7.1   | 12.4  | 12.2  | 15.5    | 19.4 | 19.2 | 16.9 |
| 100  | 1.87      | 1.16  | 0.81 | 0.54 | 8.63    | 6.61  | 4.08  | 2.75 | 5.9      | 8.1   | 17.2  | 21.9  | 18.6    | 26.4 | 28.0 | 26.9 |
| 200  | 1.29      | 0.96  | 0.76 | 0.56 | 8.13    | 6.52  | 4.03  | 2.60 | 7.2      | 13.7  | 27.6  | 34.7  | 31.7    | 45.5 | 48.5 | 44.5 |
| 500  | 1.00      | 0.95  | 0.79 | 0.59 | 8.60    | 6.60  | 4.09  | 2.63 | 10.6     | 30.6  | 59.3  | 70.0  | 65.4    | 83.5 | 85.3 | 79.5 |
| 1000 | 0.86      | 0.94  | 0.79 | 0.58 | 8.49    | 6.63  | 4.08  | 2.66 | 17.4     | 52.2  | 88.1  | 93.4  | 92.7    | 99.2 | 98.8 | 98.1 |
|      | BCBOD-OLS |       |      |      |         |       |       |      |          |       |       |       |         |      |      |      |
| 50   | 9.59      | 6.37  | 3.81 | 2.78 | 20.89   | 13.81 | 9.01  | 6.19 | 58.6     | 64.8  | 66.6  | 71.4  | 44.4    | 47.3 | 50.6 | 52.0 |
| 100  | 6.89      | 4.60  | 2.82 | 2.00 | 15.92   | 9.58  | 6.17  | 4.41 | 60.1     | 65.8  | 68.7  | 71.2  | 48.7    | 47.8 | 51.9 | 52.8 |
| 200  | 5.07      | 3.22  | 1.86 | 1.35 | 11.73   | 7.15  | 4.43  | 3.02 | 60.2     | 65.9  | 67.5  | 69.6  | 50.2    | 50.6 | 51.4 | 51.9 |
| 500  | 3.07      | 2.05  | 1.27 | 0.89 | 6.96    | 4.30  | 2.73  | 1.99 | 58.7     | 65.4  | 71.3  | 73.1  | 48.7    | 48.3 | 51.9 | 53.3 |
| 1000 | 2.14      | 1.55  | 0.89 | 0.65 | 5.14    | 3.41  | 1.91  | 1.43 | 59.1     | 68.9  | 69.5  | 72.6  | 50.3    | 53.0 | 50.8 | 54.5 |

Table S.9: Trend model, Bias and IQR ( $\alpha = 0.4$ ,  $\beta = 1$ ,  $\sigma_\eta^2 = 5$ )

| N/T  | Bias     |        |       |       |         |        |       |       | IQR      |       |      |      |         |       |       |       |
|------|----------|--------|-------|-------|---------|--------|-------|-------|----------|-------|------|------|---------|-------|-------|-------|
|      | $\alpha$ |        |       |       | $\beta$ |        |       |       | $\alpha$ |       |      |      | $\beta$ |       |       |       |
|      | 10       | 20     | 50    | 100   | 10      | 20     | 50    | 100   | 10       | 20    | 50   | 100  | 10      | 20    | 50    | 100   |
|      | FE       |        |       |       |         |        |       |       |          |       |      |      |         |       |       |       |
| 50   | -24.78   | -11.44 | -4.38 | -2.14 | 1.58    | 4.12   | 2.15  | 1.18  | 6.01     | 3.74  | 2.02 | 1.48 | 16.83   | 10.53 | 5.89  | 4.22  |
| 100  | -24.84   | -11.51 | -4.45 | -2.21 | 1.21    | 3.71   | 2.12  | 1.31  | 4.37     | 2.66  | 1.49 | 1.15 | 12.56   | 7.07  | 4.32  | 2.96  |
| 200  | -24.79   | -11.51 | -4.38 | -2.15 | 0.89    | 3.53   | 2.06  | 1.18  | 2.92     | 1.89  | 1.17 | 0.78 | 8.54    | 4.98  | 3.13  | 2.01  |
| 500  | -24.51   | -11.46 | -4.37 | -2.16 | 0.99    | 3.56   | 2.18  | 1.17  | 1.98     | 1.23  | 0.74 | 0.53 | 5.25    | 3.10  | 1.88  | 1.31  |
| 1000 | -24.59   | -11.44 | -4.39 | -2.17 | 1.04    | 3.59   | 2.19  | 1.24  | 1.32     | 0.87  | 0.50 | 0.36 | 3.57    | 2.13  | 1.35  | 0.90  |
|      | IV-L     |        |       |       |         |        |       |       |          |       |      |      |         |       |       |       |
| 50   | -4.65    | -0.80  | 2.38  | 7.21  | -15.35  | 0.01   | 8.10  | 13.39 | 72.0     | 67.9  | 69.8 | 68.3 | 367.3   | 231.0 | 161.3 | 135.9 |
| 100  | -0.87    | -1.06  | 1.12  | 7.47  | -2.04   | 0.34   | 5.16  | 14.86 | 62.2     | 68.6  | 65.9 | 68.3 | 305.2   | 239.0 | 164.5 | 142.4 |
| 200  | -2.82    | -0.98  | 2.02  | 5.63  | -10.16  | 1.03   | 4.93  | 12.22 | 58.4     | 61.2  | 64.1 | 63.6 | 268.1   | 213.4 | 159.4 | 130.7 |
| 500  | -0.92    | 1.41   | 2.54  | 6.31  | -3.62   | 5.69   | 6.60  | 13.38 | 44.1     | 47.0  | 49.7 | 56.6 | 217.6   | 156.6 | 120.8 | 114.9 |
| 1000 | 0.06     | 1.94   | 1.10  | 1.06  | -1.13   | 5.74   | 3.09  | 3.20  | 28.2     | 31.6  | 38.2 | 48.3 | 137.3   | 111.6 | 94.8  | 99.1  |
|      | GMM-L1   |        |       |       |         |        |       |       |          |       |      |      |         |       |       |       |
| 50   | -9.77    | -4.24  | -1.94 | -1.22 | -20.98  | -10.73 | -4.27 | -2.30 | 20.31    | 11.50 | 6.75 | 5.23 | 78.06   | 40.01 | 17.06 | 10.59 |
| 100  | -7.80    | -4.16  | -1.59 | -1.03 | -21.75  | -12.19 | -3.40 | -2.06 | 17.61    | 9.79  | 6.24 | 4.63 | 73.60   | 37.17 | 15.28 | 10.48 |
| 200  | -6.31    | -3.38  | -1.28 | -0.60 | -21.90  | -10.92 | -3.10 | -1.34 | 14.69    | 9.47  | 5.39 | 4.43 | 67.37   | 34.71 | 14.24 | 9.34  |
| 500  | -4.33    | -2.25  | -0.62 | -0.50 | -20.95  | -7.99  | -1.96 | -0.99 | 12.37    | 7.79  | 5.03 | 3.61 | 60.02   | 28.45 | 12.49 | 7.53  |
| 1000 | -2.40    | -1.41  | -0.46 | -0.45 | -11.68  | -4.90  | -1.33 | -0.88 | 10.94    | 6.44  | 4.06 | 3.00 | 51.88   | 24.32 | 10.58 | 6.44  |
|      | GMM-L3   |        |       |       |         |        |       |       |          |       |      |      |         |       |       |       |
| 50   | -11.35   | -4.71  | -1.60 | -0.61 | -18.49  | -8.34  | -1.83 | -0.55 | 12.35    | 6.96  | 3.69 | 2.37 | 46.53   | 23.65 | 10.01 | 5.76  |
| 100  | -8.04    | -3.49  | -0.94 | -0.34 | -19.82  | -8.44  | -1.38 | -0.37 | 10.07    | 6.19  | 2.98 | 1.90 | 43.59   | 22.00 | 8.00  | 4.25  |
| 200  | -6.08    | -2.56  | -0.48 | -0.11 | -18.17  | -6.17  | -0.99 | -0.16 | 8.71     | 4.95  | 2.24 | 1.33 | 43.40   | 19.29 | 6.04  | 3.28  |
| 500  | -4.04    | -1.46  | -0.28 | -0.08 | -17.91  | -4.43  | -0.57 | -0.21 | 7.20     | 3.84  | 1.51 | 0.90 | 42.07   | 14.59 | 3.94  | 2.15  |
| 1000 | -2.85    | -1.00  | -0.15 | -0.05 | -13.73  | -3.75  | -0.37 | -0.01 | 6.60     | 2.97  | 1.03 | 0.59 | 34.33   | 12.41 | 3.17  | 1.52  |
|      | IV-B     |        |       |       |         |        |       |       |          |       |      |      |         |       |       |       |
| 50   | -2.06    | -0.33  | 0.06  | 0.02  | 5.39    | -2.12  | -0.05 | -0.24 | 49.81    | 12.86 | 3.96 | 2.03 | 277.31  | 51.73 | 10.99 | 5.99  |
| 100  | -0.74    | -0.18  | -0.01 | -0.01 | 3.89    | -0.17  | -0.12 | -0.05 | 38.35    | 9.12  | 2.70 | 1.56 | 206.76  | 36.34 | 8.25  | 4.27  |
| 200  | 0.47     | 0.03   | -0.02 | 0.05  | 5.26    | -1.01  | 0.05  | -0.07 | 25.08    | 5.98  | 1.95 | 1.13 | 146.81  | 23.71 | 5.79  | 2.85  |
| 500  | 0.22     | -0.15  | -0.04 | 0.00  | 0.82    | -0.19  | 0.01  | -0.02 | 15.36    | 4.06  | 1.29 | 0.70 | 94.88   | 16.11 | 3.55  | 1.89  |
| 1000 | -0.36    | -0.17  | -0.03 | 0.00  | 0.49    | -0.33  | -0.07 | 0.03  | 10.78    | 2.81  | 0.82 | 0.52 | 66.57   | 11.21 | 2.59  | 1.32  |
|      | GMM-B1   |        |       |       |         |        |       |       |          |       |      |      |         |       |       |       |
| 50   | -14.03   | -3.27  | -0.41 | -0.16 | -13.31  | -4.60  | -0.04 | -0.12 | 26.54    | 9.58  | 3.63 | 2.04 | 93.71   | 34.48 | 9.91  | 5.30  |
| 100  | -8.72    | -2.11  | -0.29 | -0.07 | -13.92  | -3.19  | -0.20 | 0.00  | 20.17    | 7.86  | 2.66 | 1.47 | 87.69   | 28.26 | 7.62  | 3.98  |
| 200  | -4.94    | -0.98  | -0.13 | 0.01  | -11.93  | -2.74  | -0.08 | -0.04 | 16.87    | 5.41  | 1.88 | 1.12 | 81.60   | 20.67 | 5.43  | 2.76  |
| 500  | -2.81    | -0.42  | -0.09 | 0.00  | -8.74   | -1.33  | -0.07 | 0.01  | 11.79    | 3.80  | 1.19 | 0.69 | 67.26   | 14.91 | 3.44  | 1.80  |
| 1000 | -1.77    | -0.32  | -0.04 | -0.01 | -6.36   | -0.96  | 0.00  | 0.03  | 9.49     | 2.62  | 0.80 | 0.49 | 53.67   | 10.60 | 2.49  | 1.29  |
|      | GMM-B3   |        |       |       |         |        |       |       |          |       |      |      |         |       |       |       |
| 50   | -23.78   | -6.24  | -1.28 | -0.48 | -16.78  | -4.62  | -0.09 | -0.07 | 19.41    | 8.41  | 3.48 | 2.02 | 62.90   | 26.13 | 9.30  | 5.20  |
| 100  | -17.67   | -4.25  | -0.69 | -0.23 | -17.53  | -5.24  | -0.33 | 0.03  | 15.79    | 6.60  | 2.50 | 1.48 | 58.41   | 21.25 | 7.06  | 3.92  |
| 200  | -11.22   | -2.35  | -0.36 | -0.05 | -17.82  | -4.45  | -0.22 | -0.06 | 14.22    | 5.26  | 1.87 | 1.08 | 54.55   | 17.72 | 5.31  | 2.75  |
| 500  | -6.55    | -1.01  | -0.18 | -0.03 | -15.62  | -2.07  | -0.11 | 0.00  | 10.22    | 3.75  | 1.19 | 0.69 | 51.58   | 13.83 | 3.36  | 1.87  |
| 1000 | -4.10    | -0.65  | -0.09 | -0.03 | -13.86  | -1.57  | -0.07 | 0.02  | 8.21     | 2.60  | 0.77 | 0.49 | 46.30   | 10.08 | 2.42  | 1.28  |
|      | HPJ      |        |       |       |         |        |       |       |          |       |      |      |         |       |       |       |
| 50   | 4.17     | 1.80   | 0.28  | 0.08  | 17.95   | 6.51   | 1.00  | 0.21  | 10.60    | 5.21  | 2.50 | 1.60 | 24.23   | 12.59 | 5.94  | 4.42  |
| 100  | 4.08     | 1.85   | 0.23  | 0.03  | 18.96   | 5.85   | 0.96  | 0.27  | 7.65     | 3.75  | 1.83 | 1.14 | 17.16   | 8.84  | 4.50  | 2.97  |
| 200  | 4.36     | 1.70   | 0.28  | 0.08  | 18.89   | 5.81   | 0.97  | 0.25  | 5.19     | 2.67  | 1.32 | 0.82 | 12.03   | 5.76  | 3.09  | 2.05  |
| 500  | 4.63     | 1.74   | 0.30  | 0.06  | 18.97   | 6.08   | 0.96  | 0.20  | 3.33     | 1.68  | 0.83 | 0.54 | 8.01    | 3.78  | 1.93  | 1.31  |
| 1000 | 4.46     | 1.73   | 0.26  | 0.06  | 18.85   | 6.17   | 1.03  | 0.27  | 2.25     | 1.20  | 0.57 | 0.38 | 5.39    | 2.61  | 1.43  | 0.91  |

Table S.10: Trend model, MAE and Size ( $\alpha = 0.4$ ,  $\beta = 1$ ,  $\sigma_\eta^2 = 5$ )

| N/T  | MAE      |       |       |       |         |       |      |      | Size     |       |       |       |         |      |      |      |
|------|----------|-------|-------|-------|---------|-------|------|------|----------|-------|-------|-------|---------|------|------|------|
|      | $\alpha$ |       |       |       | $\beta$ |       |      |      | $\alpha$ |       |       |       | $\beta$ |      |      |      |
|      | 10       | 20    | 50    | 100   | 10      | 20    | 50   | 100  | 10       | 20    | 50    | 100   | 10      | 20   | 50   | 100  |
|      | FE       |       |       |       |         |       |      |      |          |       |       |       |         |      |      |      |
| 50   | 24.78    | 11.44 | 4.38  | 2.14  | 8.28    | 6.07  | 3.39 | 2.09 | 100.0    | 98.6  | 77.5  | 48.0  | 8.0     | 11.3 | 10.6 | 8.2  |
| 100  | 24.84    | 11.51 | 4.45  | 2.21  | 6.22    | 4.46  | 2.58 | 1.71 | 100.0    | 100.0 | 96.5  | 75.0  | 7.1     | 12.3 | 12.4 | 10.0 |
| 200  | 24.79    | 11.51 | 4.38  | 2.15  | 4.39    | 3.84  | 2.19 | 1.30 | 100.0    | 100.0 | 100.0 | 96.2  | 6.7     | 16.5 | 19.3 | 13.3 |
| 500  | 24.51    | 11.46 | 4.37  | 2.16  | 2.71    | 3.56  | 2.19 | 1.19 | 100.0    | 100.0 | 100.0 | 100.0 | 6.3     | 31.9 | 37.5 | 26.0 |
| 1000 | 24.59    | 11.44 | 4.39  | 2.17  | 1.92    | 3.59  | 2.19 | 1.24 | 100.0    | 100.0 | 100.0 | 100.0 | 7.1     | 57.8 | 62.9 | 48.0 |
|      | IV-L     |       |       |       |         |       |      |      |          |       |       |       |         |      |      |      |
| 50   | 36.57    | 34.51 | 34.84 | 36.46 | 184.7   | 115.3 | 82.0 | 71.2 | 0.2      | 0.1   | 0.2   | 0.3   | 0.2     | 0.1  | 0.2  | 0.3  |
| 100  | 30.96    | 33.88 | 33.06 | 36.45 | 152.6   | 119.6 | 80.2 | 73.5 | 0.2      | 0.2   | 0.2   | 0.2   | 0.0     | 0.0  | 0.3  | 0.0  |
| 200  | 29.44    | 30.85 | 32.05 | 31.66 | 135.1   | 108.3 | 78.0 | 65.2 | 0.2      | 0.0   | 0.1   | 0.3   | 0.2     | 0.2  | 0.1  | 0.3  |
| 500  | 21.78    | 23.20 | 24.60 | 29.39 | 106.1   | 78.4  | 60.5 | 59.6 | 0.2      | 0.3   | 0.2   | 0.0   | 0.1     | 0.1  | 0.2  | 0.1  |
| 1000 | 14.17    | 15.79 | 19.62 | 24.47 | 68.9    | 56.4  | 47.7 | 49.6 | 0.4      | 1.0   | 0.5   | 0.3   | 0.3     | 0.5  | 0.5  | 0.3  |
|      | GMM-L1   |       |       |       |         |       |      |      |          |       |       |       |         |      |      |      |
| 50   | 11.92    | 6.31  | 3.42  | 2.67  | 42.00   | 21.06 | 8.67 | 5.66 | 9.7      | 7.3   | 5.4   | 5.5   | 3.0     | 5.8  | 4.5  | 5.4  |
| 100  | 10.00    | 5.79  | 3.29  | 2.35  | 40.19   | 20.20 | 8.33 | 5.36 | 7.4      | 5.3   | 5.4   | 5.8   | 3.8     | 4.4  | 4.4  | 4.8  |
| 200  | 8.63     | 5.52  | 2.81  | 2.15  | 36.63   | 18.81 | 7.43 | 4.84 | 6.0      | 4.5   | 6.1   | 5.6   | 3.2     | 3.9  | 5.5  | 4.9  |
| 500  | 6.87     | 4.29  | 2.49  | 1.81  | 33.27   | 15.71 | 6.08 | 3.75 | 3.8      | 5.1   | 5.9   | 4.9   | 3.3     | 4.5  | 5.5  | 5.3  |
| 1000 | 5.69     | 3.31  | 2.09  | 1.59  | 27.82   | 12.06 | 5.25 | 3.37 | 4.0      | 5.2   | 6.1   | 4.1   | 4.3     | 4.5  | 5.8  | 3.8  |
|      | GMM-L3   |       |       |       |         |       |      |      |          |       |       |       |         |      |      |      |
| 50   | 11.43    | 5.04  | 2.14  | 1.25  | 28.20   | 13.19 | 5.07 | 2.88 | 23.9     | 15.2  | 10.1  | 6.7   | 8.3     | 7.7  | 7.4  | 6.6  |
| 100  | 8.37     | 4.05  | 1.62  | 0.93  | 26.72   | 12.77 | 3.99 | 2.14 | 17.5     | 13.4  | 7.4   | 6.9   | 8.8     | 8.6  | 6.1  | 6.0  |
| 200  | 6.50     | 3.07  | 1.13  | 0.67  | 26.06   | 10.74 | 3.15 | 1.64 | 13.6     | 10.2  | 6.6   | 6.1   | 7.8     | 7.2  | 4.6  | 5.9  |
| 500  | 4.73     | 2.19  | 0.79  | 0.47  | 24.04   | 7.97  | 2.06 | 1.08 | 10.5     | 6.6   | 5.6   | 6.0   | 8.3     | 6.8  | 5.0  | 4.9  |
| 1000 | 3.80     | 1.62  | 0.55  | 0.30  | 19.84   | 6.74  | 1.56 | 0.75 | 7.9      | 6.3   | 4.5   | 5.3   | 7.2     | 5.3  | 5.0  | 5.1  |
|      | IV-B     |       |       |       |         |       |      |      |          |       |       |       |         |      |      |      |
| 50   | 25.62    | 6.38  | 1.98  | 1.02  | 140.79  | 26.20 | 5.42 | 3.01 | 1.5      | 3.5   | 5.5   | 5.5   | 0.1     | 2.4  | 5.4  | 6.4  |
| 100  | 19.32    | 4.66  | 1.35  | 0.78  | 103.11  | 18.36 | 4.09 | 2.16 | 1.2      | 4.6   | 6.0   | 7.0   | 0.0     | 4.7  | 5.9  | 6.0  |
| 200  | 12.55    | 2.99  | 0.99  | 0.56  | 73.95   | 11.89 | 2.92 | 1.43 | 2.5      | 4.6   | 5.0   | 4.9   | 0.5     | 4.7  | 4.0  | 5.6  |
| 500  | 7.74     | 2.03  | 0.63  | 0.35  | 46.75   | 7.97  | 1.77 | 0.95 | 3.1      | 5.3   | 5.1   | 5.5   | 1.6     | 4.6  | 4.6  | 5.4  |
| 1000 | 5.38     | 1.42  | 0.41  | 0.26  | 33.09   | 5.61  | 1.30 | 0.66 | 4.1      | 4.9   | 4.8   | 4.8   | 3.3     | 5.6  | 5.7  | 6.9  |
|      | GMM-B1   |       |       |       |         |       |      |      |          |       |       |       |         |      |      |      |
| 50   | 17.52    | 5.35  | 1.79  | 1.04  | 47.33   | 17.82 | 4.97 | 2.65 | 12.6     | 8.2   | 5.6   | 6.2   | 3.7     | 4.8  | 5.4  | 6.0  |
| 100  | 12.82    | 4.26  | 1.27  | 0.73  | 45.43   | 14.09 | 3.82 | 2.00 | 9.3      | 7.0   | 6.1   | 5.5   | 3.8     | 5.6  | 5.0  | 5.4  |
| 200  | 8.62     | 2.66  | 0.94  | 0.56  | 41.76   | 10.51 | 2.72 | 1.38 | 6.8      | 5.2   | 4.4   | 5.3   | 2.4     | 3.7  | 4.7  | 4.6  |
| 500  | 6.33     | 1.93  | 0.60  | 0.34  | 34.60   | 7.40  | 1.69 | 0.90 | 5.8      | 5.8   | 4.6   | 5.3   | 3.3     | 5.3  | 4.7  | 4.7  |
| 1000 | 4.94     | 1.36  | 0.39  | 0.25  | 28.73   | 5.33  | 1.25 | 0.64 | 4.8      | 6.0   | 4.5   | 4.8   | 4.0     | 5.7  | 5.6  | 6.7  |
|      | GMM-B3   |       |       |       |         |       |      |      |          |       |       |       |         |      |      |      |
| 50   | 23.78    | 6.39  | 1.86  | 1.05  | 33.65   | 13.73 | 4.64 | 2.62 | 38.2     | 19.3  | 8.1   | 6.5   | 7.3     | 6.3  | 5.9  | 6.6  |
| 100  | 17.76    | 4.73  | 1.35  | 0.76  | 31.67   | 11.13 | 3.56 | 1.97 | 29.8     | 12.4  | 7.3   | 6.8   | 6.9     | 6.1  | 5.9  | 6.6  |
| 200  | 11.45    | 2.94  | 0.96  | 0.55  | 28.68   | 9.42  | 2.60 | 1.36 | 19.2     | 10.2  | 5.5   | 5.5   | 6.2     | 4.2  | 4.4  | 4.9  |
| 500  | 7.19     | 1.97  | 0.60  | 0.34  | 26.64   | 6.97  | 1.69 | 0.92 | 13.1     | 7.6   | 4.8   | 5.2   | 6.9     | 4.7  | 5.3  | 4.7  |
| 1000 | 5.25     | 1.40  | 0.41  | 0.25  | 24.81   | 5.20  | 1.27 | 0.64 | 10.5     | 7.4   | 5.0   | 5.1   | 6.9     | 5.9  | 5.6  | 6.2  |
|      | HPJ      |       |       |       |         |       |      |      |          |       |       |       |         |      |      |      |
| 50   | 6.06     | 2.99  | 1.24  | 0.80  | 18.94   | 8.24  | 3.03 | 2.14 | —        | —     | —     | —     | —       | —    | —    | —    |
| 100  | 4.87     | 2.35  | 0.90  | 0.56  | 19.04   | 6.43  | 2.23 | 1.52 | —        | —     | —     | —     | —       | —    | —    | —    |
| 200  | 4.46     | 1.83  | 0.69  | 0.41  | 18.89   | 5.84  | 1.70 | 1.07 | —        | —     | —     | —     | —       | —    | —    | —    |
| 500  | 4.63     | 1.75  | 0.50  | 0.28  | 18.97   | 6.08  | 1.21 | 0.65 | —        | —     | —     | —     | —       | —    | —    | —    |
| 1000 | 4.46     | 1.73  | 0.33  | 0.19  | 18.85   | 6.17  | 1.09 | 0.50 | —        | —     | —     | —     | —       | —    | —    | —    |

Table S.11: Trend model, Bias and IQR ( $\alpha = 0.8$ ,  $\beta = 1$ ,  $\sigma_\eta^2 = 5$ ,  $\phi_y = 1$ ,  $\phi_x = 1$ )

| N/T  | Bias     |        |       |       |         |        |       |       | IQR      |       |      |      |         |        |       |      |
|------|----------|--------|-------|-------|---------|--------|-------|-------|----------|-------|------|------|---------|--------|-------|------|
|      | $\alpha$ |        |       |       | $\beta$ |        |       |       | $\alpha$ |       |      |      | $\beta$ |        |       |      |
|      | 10       | 20     | 50    | 100   | 10      | 20     | 50    | 100   | 10       | 20    | 50   | 100  | 10      | 20     | 50    | 100  |
|      | FE       |        |       |       |         |        |       |       |          |       |      |      |         |        |       |      |
| 50   | -36.57   | -15.89 | -5.41 | -2.53 | -9.34   | 0.44   | 2.21  | 1.51  | 6.01     | 3.46  | 1.61 | 0.98 | 15.72   | 10.40  | 5.77  | 4.02 |
| 100  | -36.72   | -15.83 | -5.42 | -2.55 | -10.19  | 0.25   | 2.05  | 1.59  | 4.73     | 2.34  | 1.13 | 0.70 | 12.41   | 6.99   | 4.24  | 2.89 |
| 200  | -36.46   | -15.80 | -5.35 | -2.51 | -10.05  | 0.06   | 2.05  | 1.46  | 3.20     | 1.78  | 0.81 | 0.51 | 8.34    | 4.93   | 3.06  | 2.03 |
| 500  | -36.43   | -15.79 | -5.36 | -2.49 | -10.06  | 0.07   | 2.15  | 1.47  | 2.05     | 1.13  | 0.54 | 0.33 | 5.47    | 3.09   | 1.86  | 1.30 |
| 1000 | -36.42   | -15.82 | -5.37 | -2.50 | -10.03  | 0.10   | 2.15  | 1.53  | 1.45     | 0.74  | 0.37 | 0.24 | 3.49    | 2.15   | 1.32  | 0.87 |
|      | IV-L     |        |       |       |         |        |       |       |          |       |      |      |         |        |       |      |
| 50   | -7.44    | -0.57  | 1.81  | 6.11  | 4.78    | 8.27   | 11.60 | 12.70 | 126.6    | 69.6  | 53.0 | 44.2 | 370.6   | 225.7  | 109.5 | 71.5 |
| 100  | -9.26    | -0.35  | 0.83  | 6.16  | 8.89    | 8.82   | 10.00 | 11.75 | 111.6    | 79.8  | 54.4 | 47.1 | 312.2   | 219.5  | 103.3 | 74.1 |
| 200  | -8.13    | -2.80  | 2.23  | 6.34  | -11.35  | 9.19   | 10.98 | 10.51 | 104.0    | 85.9  | 58.1 | 42.0 | 283.1   | 240.2  | 105.2 | 67.2 |
| 500  | -3.06    | -3.79  | 5.30  | 5.33  | 0.60    | 3.38   | 12.30 | 9.94  | 99.8     | 81.8  | 49.1 | 42.4 | 249.4   | 203.2  | 103.1 | 69.1 |
| 1000 | -1.66    | 0.31   | 0.91  | 4.08  | -0.17   | 11.67  | 6.01  | 7.32  | 75.2     | 65.9  | 51.9 | 41.6 | 216.0   | 180.7  | 104.5 | 68.7 |
|      | GMM-L1   |        |       |       |         |        |       |       |          |       |      |      |         |        |       |      |
| 50   | -40.88   | -15.29 | -4.44 | -2.17 | -12.77  | -9.37  | -7.34 | -3.24 | 33.06    | 16.90 | 6.54 | 4.21 | 79.76   | 48.26  | 17.89 | 8.21 |
| 100  | -38.45   | -13.07 | -4.17 | -2.08 | -21.50  | -16.51 | -8.37 | -3.44 | 31.63    | 13.67 | 6.52 | 3.95 | 80.79   | 43.44  | 15.64 | 8.09 |
| 200  | -38.24   | -11.73 | -3.85 | -1.80 | -31.55  | -21.54 | -8.58 | -3.11 | 33.12    | 14.36 | 6.13 | 3.94 | 84.05   | 42.88  | 15.10 | 7.94 |
| 500  | -32.27   | -9.35  | -2.98 | -1.53 | -41.91  | -19.78 | -6.37 | -2.68 | 30.96    | 12.86 | 6.03 | 3.45 | 76.61   | 32.49  | 14.28 | 6.70 |
| 1000 | -27.37   | -8.30  | -2.63 | -1.05 | -44.74  | -20.12 | -6.12 | -1.90 | 25.69    | 12.12 | 5.46 | 3.08 | 66.35   | 32.15  | 12.55 | 5.64 |
|      | GMM-L3   |        |       |       |         |        |       |       |          |       |      |      |         |        |       |      |
| 50   | -29.64   | -11.59 | -3.79 | -1.66 | -37.83  | -17.81 | -6.22 | -2.23 | 18.02    | 8.38  | 3.63 | 2.41 | 46.58   | 24.80  | 11.16 | 5.90 |
| 100  | -25.14   | -10.63 | -3.23 | -1.34 | -43.79  | -22.59 | -6.95 | -2.19 | 15.05    | 8.05  | 3.79 | 2.09 | 45.97   | 22.20  | 10.77 | 5.29 |
| 200  | -22.33   | -9.50  | -2.74 | -0.88 | -47.89  | -22.84 | -6.89 | -1.73 | 14.71    | 7.46  | 3.14 | 1.69 | 45.95   | 22.46  | 8.85  | 4.23 |
| 500  | -19.46   | -8.34  | -2.33 | -0.57 | -52.66  | -22.44 | -5.92 | -1.09 | 13.82    | 6.84  | 2.94 | 1.37 | 43.30   | 20.21  | 7.75  | 3.23 |
| 1000 | -17.41   | -7.55  | -1.86 | -0.33 | -48.88  | -21.62 | -4.59 | -0.56 | 13.37    | 6.71  | 2.64 | 1.03 | 41.21   | 19.68  | 7.09  | 2.42 |
|      | IV-B     |        |       |       |         |        |       |       |          |       |      |      |         |        |       |      |
| 50   | -19.51   | -3.56  | 0.29  | 0.01  | -51.73  | -6.81  | 1.49  | -0.14 | 114.14   | 62.35 | 8.56 | 2.51 | 349.71  | 175.79 | 19.57 | 6.74 |
| 100  | -18.24   | 0.55   | 0.02  | -0.04 | -54.67  | 2.38   | 0.47  | -0.14 | 119.73   | 50.53 | 5.88 | 1.84 | 346.86  | 139.54 | 13.48 | 4.72 |
| 200  | -13.70   | 0.49   | 0.01  | 0.03  | -34.03  | 3.29   | 0.10  | -0.04 | 116.13   | 37.30 | 3.80 | 1.40 | 341.30  | 103.02 | 9.21  | 3.26 |
| 500  | -14.28   | -0.52  | 0.00  | 0.01  | -38.17  | 0.57   | 0.08  | 0.02  | 116.66   | 22.43 | 2.53 | 0.87 | 343.51  | 61.14  | 5.50  | 2.07 |
| 1000 | -12.40   | -0.47  | 0.03  | 0.00  | -34.44  | -0.08  | -0.02 | 0.01  | 103.19   | 16.93 | 1.75 | 0.61 | 321.56  | 48.01  | 4.20  | 1.51 |
|      | GMM-B1   |        |       |       |         |        |       |       |          |       |      |      |         |        |       |      |
| 50   | -36.42   | -11.90 | -2.47 | -0.55 | -37.35  | -21.64 | -3.77 | -0.46 | 36.27    | 14.82 | 5.00 | 2.18 | 90.48   | 41.46  | 13.26 | 5.98 |
| 100  | -32.26   | -10.25 | -1.63 | -0.35 | -45.73  | -22.88 | -2.58 | -0.34 | 32.77    | 14.49 | 4.25 | 1.64 | 85.08   | 40.40  | 10.51 | 4.34 |
| 200  | -26.34   | -8.89  | -1.04 | -0.13 | -49.56  | -21.64 | -1.85 | -0.08 | 30.91    | 14.13 | 3.38 | 1.24 | 87.77   | 38.75  | 7.83  | 2.99 |
| 500  | -24.15   | -6.82  | -0.45 | -0.06 | -58.82  | -16.30 | -0.80 | -0.03 | 29.22    | 12.36 | 2.21 | 0.78 | 83.18   | 34.48  | 4.84  | 1.99 |
| 1000 | -21.66   | -5.79  | -0.21 | -0.03 | -61.91  | -14.44 | -0.43 | 0.02  | 27.85    | 10.63 | 1.55 | 0.55 | 84.44   | 29.89  | 3.79  | 1.41 |
|      | GMM-B3   |        |       |       |         |        |       |       |          |       |      |      |         |        |       |      |
| 50   | -47.30   | -15.07 | -3.59 | -1.11 | -35.20  | -17.09 | -3.70 | -0.91 | 24.45    | 9.29  | 3.92 | 1.87 | 55.85   | 26.82  | 10.78 | 5.65 |
| 100  | -42.70   | -13.33 | -2.86 | -0.76 | -41.91  | -21.75 | -4.34 | -0.57 | 23.13    | 9.23  | 3.25 | 1.55 | 57.91   | 23.95  | 8.40  | 3.99 |
| 200  | -36.42   | -11.74 | -2.02 | -0.38 | -52.68  | -23.63 | -3.22 | -0.29 | 22.95    | 9.15  | 2.72 | 1.10 | 58.75   | 23.41  | 7.45  | 2.97 |
| 500  | -31.02   | -9.81  | -1.06 | -0.14 | -60.89  | -22.68 | -1.89 | -0.16 | 20.10    | 8.43  | 2.26 | 0.75 | 54.22   | 22.52  | 4.93  | 1.98 |
| 1000 | -27.53   | -8.75  | -0.61 | -0.09 | -64.76  | -21.23 | -1.05 | -0.05 | 19.46    | 8.03  | 1.46 | 0.54 | 57.29   | 21.68  | 3.59  | 1.44 |
|      | HPJ      |        |       |       |         |        |       |       |          |       |      |      |         |        |       |      |
| 50   | 4.72     | 4.98   | 1.35  | 0.40  | 15.14   | 10.48  | 2.96  | 0.82  | 12.12    | 6.30  | 2.51 | 1.26 | 25.94   | 13.91  | 6.01  | 4.21 |
| 100  | 4.84     | 4.85   | 1.36  | 0.35  | 14.30   | 9.87   | 2.92  | 0.92  | 9.20     | 4.40  | 1.68 | 0.83 | 18.42   | 9.46   | 4.41  | 2.92 |
| 200  | 5.16     | 4.93   | 1.39  | 0.36  | 15.11   | 10.11  | 2.92  | 0.82  | 6.14     | 3.05  | 1.21 | 0.63 | 11.95   | 6.28   | 3.14  | 2.05 |
| 500  | 5.41     | 4.90   | 1.37  | 0.39  | 15.45   | 10.05  | 2.95  | 0.82  | 4.01     | 1.85  | 0.75 | 0.40 | 8.41    | 3.91   | 1.97  | 1.29 |
| 1000 | 5.37     | 4.85   | 1.36  | 0.38  | 15.11   | 10.28  | 2.99  | 0.88  | 2.75     | 1.30  | 0.50 | 0.27 | 5.58    | 2.71   | 1.46  | 0.91 |

Table S.12: Trend model, MAE and Size ( $\alpha = 0.8$ ,  $\beta = 1$ ,  $\sigma_\eta^2 = 5$ ,  $\phi_y = 1$ ,  $\phi_x = 1$ )

| N/T  | MAE      |       |       |       |         |        |       |       | Size     |       |       |       |         |      |      |      |
|------|----------|-------|-------|-------|---------|--------|-------|-------|----------|-------|-------|-------|---------|------|------|------|
|      | $\alpha$ |       |       |       | $\beta$ |        |       |       | $\alpha$ |       |       |       | $\beta$ |      |      |      |
|      | 10       | 20    | 50    | 100   | 10      | 20     | 50    | 100   | 10       | 20    | 50    | 100   | 10      | 20   | 50   | 100  |
|      | FE       |       |       |       |         |        |       |       |          |       |       |       |         |      |      |      |
| 50   | 36.57    | 15.89 | 5.41  | 2.53  | 11.04   | 5.19   | 3.29  | 2.14  | 100.0    | 100.0 | 99.7  | 90.9  | 15.6    | 8.2  | 10.7 | 10.2 |
| 100  | 36.72    | 15.83 | 5.42  | 2.55  | 10.41   | 3.44   | 2.52  | 1.82  | 100.0    | 100.0 | 100.0 | 99.8  | 25.1    | 6.9  | 12.7 | 12.0 |
| 200  | 36.46    | 15.80 | 5.35  | 2.51  | 10.05   | 2.46   | 2.15  | 1.53  | 100.0    | 100.0 | 100.0 | 100.0 | 41.7    | 6.6  | 19.6 | 19.6 |
| 500  | 36.43    | 15.79 | 5.36  | 2.49  | 10.06   | 1.54   | 2.15  | 1.47  | 100.0    | 100.0 | 100.0 | 100.0 | 75.4    | 5.5  | 36.6 | 38.1 |
| 1000 | 36.42    | 15.82 | 5.37  | 2.50  | 10.03   | 1.08   | 2.15  | 1.53  | 100.0    | 100.0 | 100.0 | 100.0 | 96.4    | 4.6  | 62.5 | 65.3 |
|      | IV-L     |       |       |       |         |        |       |       |          |       |       |       |         |      |      |      |
| 50   | 63.64    | 34.81 | 27.06 | 23.88 | 187.06  | 111.23 | 57.18 | 35.37 | 0.3      | 0.0   | 0.5   | 0.1   | 0.1     | 0.0  | 0.4  | 0.9  |
| 100  | 57.68    | 39.90 | 27.00 | 25.05 | 156.86  | 107.05 | 51.70 | 39.71 | 0.0      | 0.2   | 0.0   | 0.1   | 0.1     | 0.0  | 0.5  | 1.4  |
| 200  | 52.15    | 43.16 | 28.26 | 21.41 | 142.75  | 119.26 | 52.87 | 34.17 | 0.0      | 0.0   | 0.0   | 0.2   | 0.0     | 0.3  | 0.7  | 0.0  |
| 500  | 49.40    | 41.09 | 25.37 | 22.55 | 124.35  | 100.66 | 50.84 | 36.78 | 0.1      | 0.2   | 0.1   | 0.1   | 0.0     | 0.1  | 0.5  | 0.2  |
| 1000 | 37.71    | 33.00 | 26.38 | 21.98 | 108.19  | 90.18  | 51.82 | 35.81 | 0.0      | 0.1   | 0.1   | 0.4   | 0.2     | 0.1  | 0.3  | 0.4  |
|      | GMM-L1   |       |       |       |         |        |       |       |          |       |       |       |         |      |      |      |
| 50   | 40.88    | 15.32 | 4.74  | 2.67  | 41.23   | 24.77  | 10.75 | 4.80  | 28.8     | 16.6  | 10.7  | 8.2   | 3.6     | 5.3  | 7.7  | 8.0  |
| 100  | 38.45    | 13.07 | 4.55  | 2.53  | 41.42   | 25.65  | 9.97  | 4.72  | 25.6     | 12.2  | 9.9   | 7.4   | 3.3     | 4.9  | 7.1  | 6.1  |
| 200  | 38.24    | 11.86 | 4.20  | 2.38  | 46.62   | 25.71  | 9.79  | 4.17  | 24.0     | 11.9  | 7.7   | 7.1   | 4.2     | 5.8  | 6.0  | 6.1  |
| 500  | 32.32    | 9.56  | 3.57  | 2.10  | 49.03   | 22.42  | 8.31  | 3.85  | 19.2     | 9.7   | 7.7   | 6.0   | 5.4     | 6.1  | 7.0  | 4.4  |
| 1000 | 27.59    | 8.57  | 3.26  | 1.68  | 49.22   | 21.69  | 7.53  | 2.97  | 18.0     | 9.8   | 7.5   | 5.7   | 7.8     | 6.4  | 7.6  | 5.4  |
|      | GMM-L3   |       |       |       |         |        |       |       |          |       |       |       |         |      |      |      |
| 50   | 29.64    | 11.59 | 3.79  | 1.74  | 39.09   | 18.96  | 7.42  | 3.55  | 65.6     | 47.4  | 26.3  | 15.2  | 21.1    | 18.8 | 11.8 | 9.2  |
| 100  | 25.14    | 10.63 | 3.25  | 1.44  | 44.19   | 22.69  | 7.51  | 2.98  | 58.7     | 45.6  | 24.4  | 12.6  | 26.4    | 25.3 | 15.6 | 7.7  |
| 200  | 22.33    | 9.50  | 2.81  | 1.06  | 48.01   | 22.91  | 7.16  | 2.43  | 53.1     | 40.3  | 19.4  | 10.7  | 35.1    | 29.3 | 15.4 | 7.9  |
| 500  | 19.46    | 8.34  | 2.41  | 0.81  | 52.66   | 22.45  | 6.33  | 1.78  | 46.6     | 34.8  | 15.3  | 8.9   | 38.2    | 29.4 | 15.4 | 6.2  |
| 1000 | 17.41    | 7.56  | 1.97  | 0.57  | 48.88   | 21.67  | 4.92  | 1.28  | 41.6     | 32.7  | 13.5  | 6.0   | 36.3    | 29.9 | 12.4 | 5.8  |
|      | IV-B     |       |       |       |         |        |       |       |          |       |       |       |         |      |      |      |
| 50   | 62.84    | 31.39 | 4.30  | 1.27  | 176.87  | 87.96  | 9.80  | 3.34  | 0.6      | 0.4   | 3.4   | 4.0   | 0.2     | 0.2  | 4.0  | 6.1  |
| 100  | 61.55    | 25.51 | 2.93  | 0.91  | 176.61  | 70.24  | 6.74  | 2.35  | 1.0      | 0.5   | 4.5   | 5.4   | 0.1     | 0.2  | 4.0  | 5.0  |
| 200  | 59.70    | 18.70 | 1.90  | 0.69  | 172.40  | 51.27  | 4.64  | 1.63  | 0.6      | 0.5   | 4.4   | 4.1   | 0.1     | 0.5  | 4.3  | 4.9  |
| 500  | 60.40    | 11.21 | 1.26  | 0.43  | 177.08  | 30.65  | 2.75  | 1.04  | 0.6      | 0.7   | 4.9   | 5.0   | 0.2     | 0.8  | 4.8  | 5.1  |
| 1000 | 53.79    | 8.33  | 0.87  | 0.31  | 163.57  | 23.84  | 2.10  | 0.77  | 0.7      | 1.3   | 5.5   | 5.4   | 0.3     | 1.0  | 5.3  | 5.9  |
|      | GMM-B1   |       |       |       |         |        |       |       |          |       |       |       |         |      |      |      |
| 50   | 36.81    | 12.11 | 3.10  | 1.10  | 52.45   | 25.89  | 6.87  | 2.94  | 28.7     | 20.0  | 8.1   | 6.4   | 6.3     | 11.1 | 7.0  | 6.5  |
| 100  | 33.05    | 10.67 | 2.39  | 0.86  | 56.97   | 26.57  | 5.57  | 2.12  | 24.4     | 18.4  | 8.0   | 6.4   | 8.7     | 13.8 | 5.5  | 6.7  |
| 200  | 27.34    | 9.40  | 1.81  | 0.62  | 57.79   | 24.24  | 4.16  | 1.51  | 19.2     | 16.0  | 7.7   | 5.7   | 9.9     | 11.6 | 6.6  | 5.2  |
| 500  | 25.50    | 7.82  | 1.17  | 0.39  | 62.51   | 20.59  | 2.51  | 0.99  | 19.3     | 12.4  | 5.7   | 5.9   | 13.4    | 10.0 | 5.9  | 4.3  |
| 1000 | 22.96    | 6.85  | 0.78  | 0.27  | 65.55   | 18.17  | 1.86  | 0.70  | 15.6     | 10.0  | 5.2   | 5.1   | 12.2    | 9.6  | 5.2  | 6.1  |
|      | GMM-B3   |       |       |       |         |        |       |       |          |       |       |       |         |      |      |      |
| 50   | 47.30    | 15.07 | 3.61  | 1.23  | 39.94   | 18.50  | 5.65  | 2.84  | 76.9     | 57.0  | 25.7  | 14.0  | 11.6    | 14.6 | 9.9  | 7.2  |
| 100  | 42.70    | 13.33 | 2.91  | 0.92  | 45.70   | 22.45  | 5.47  | 2.07  | 72.0     | 51.2  | 19.6  | 9.9   | 17.0    | 20.3 | 9.7  | 7.0  |
| 200  | 36.42    | 11.74 | 2.10  | 0.60  | 53.38   | 23.66  | 4.04  | 1.50  | 63.6     | 44.9  | 16.1  | 8.1   | 21.9    | 26.0 | 10.9 | 5.6  |
| 500  | 31.02    | 9.83  | 1.36  | 0.38  | 60.97   | 23.05  | 2.85  | 0.99  | 55.2     | 39.3  | 10.6  | 7.0   | 32.2    | 28.3 | 7.9  | 5.2  |
| 1000 | 27.53    | 8.75  | 0.86  | 0.29  | 64.76   | 21.29  | 1.96  | 0.73  | 50.9     | 36.5  | 8.7   | 5.7   | 38.4    | 29.7 | 6.8  | 6.0  |
|      | HPJ      |       |       |       |         |        |       |       |          |       |       |       |         |      |      |      |
| 50   | 7.08     | 5.15  | 1.56  | 0.68  | 16.88   | 11.11  | 3.84  | 2.12  | —        | —     | —     | —     | —       | —    | —    | —    |
| 100  | 5.87     | 4.85  | 1.41  | 0.51  | 14.83   | 9.92   | 3.16  | 1.56  | —        | —     | —     | —     | —       | —    | —    | —    |
| 200  | 5.30     | 4.93  | 1.39  | 0.41  | 15.11   | 10.11  | 2.94  | 1.18  | —        | —     | —     | —     | —       | —    | —    | —    |
| 500  | 5.41     | 4.90  | 1.37  | 0.40  | 15.45   | 10.05  | 2.95  | 0.88  | —        | —     | —     | —     | —       | —    | —    | —    |
| 1000 | 5.37     | 4.85  | 1.36  | 0.38  | 15.11   | 10.28  | 2.99  | 0.88  | —        | —     | —     | —     | —       | —    | —    | —    |
